# Supplementary material for: Dissecting Causal Associations of Diet-Derived Circulating Antioxidants with Six Major Mental Disorders: A Mendelian Randomization Study
Source: Antioxidants (Basel). 2023 Jan 10;12(1):162. doi: 10.3390/antiox12010162 (PMC9855039; doi:10.3390/antiox12010162)
Supplement: Supplementary file 1 [file antioxidants-12-00162-s001.zip › Supplemental Figures S1-S4.pdf]

## Supplementary Figures

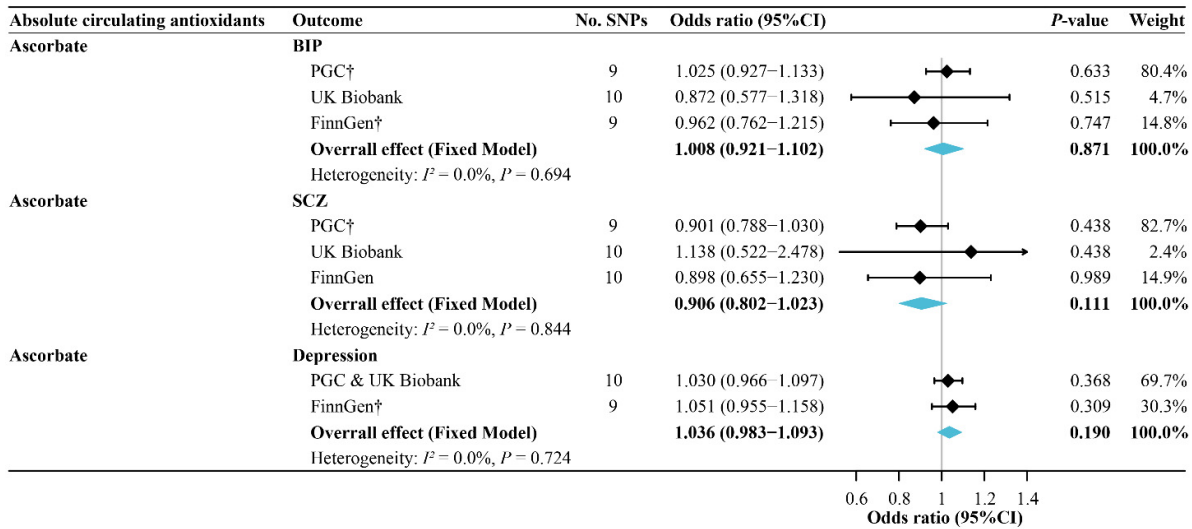

**Figure S1.** The MR analyses for absolute circulating antioxidant levels on the risk of major mental disorders after removing outliers. The ORs are scaled per  $\mu\text{mol/L}$  increase in ascorbate. †: MR analysis results after removing 1 outlier by MR-PRESSO.

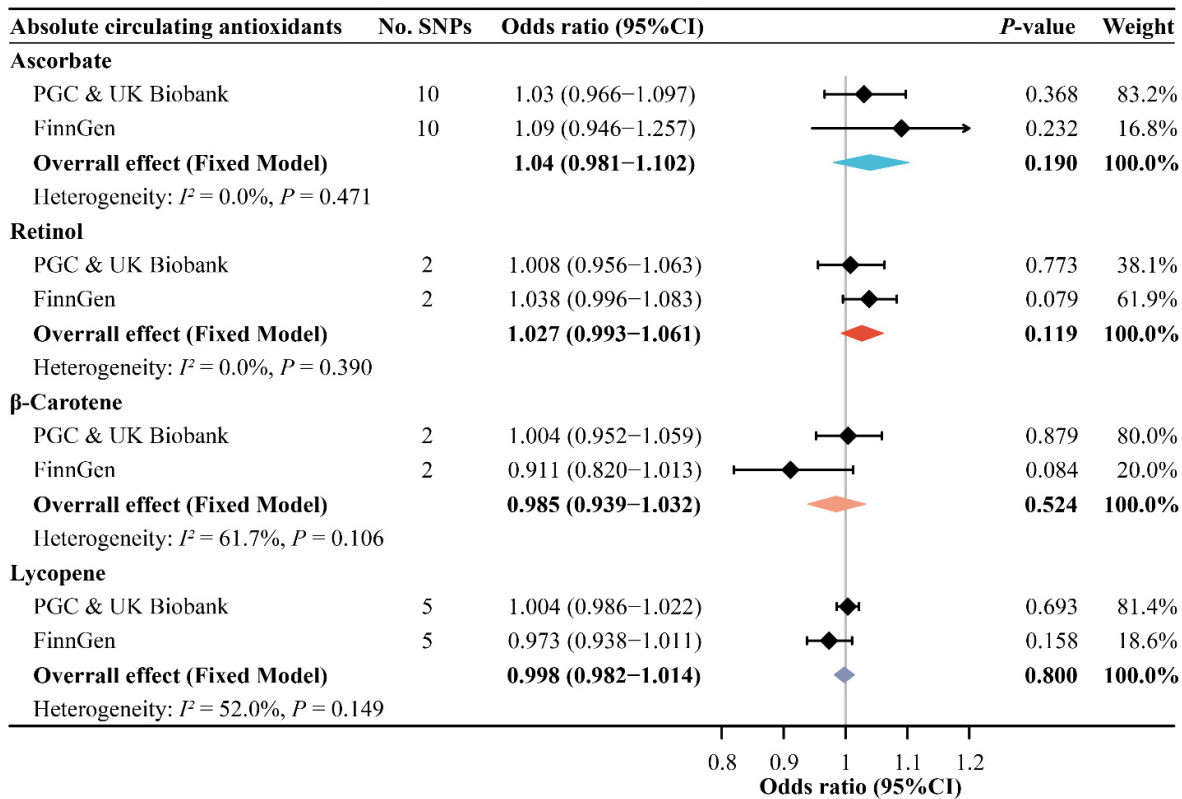

**Figure S2.** The causal effects of four absolute circulating antioxidant levels on the risk of depression. The ORs are scaled per  $\mu\text{mol/L}$  increase in ascorbate, per 0.1 unit increase in  $\ln$ -transformed retinol, per unit increase in  $\ln$ -transformed  $\beta$ -carotene, and per  $\mu\text{g/dL}$  increase in lycopene.

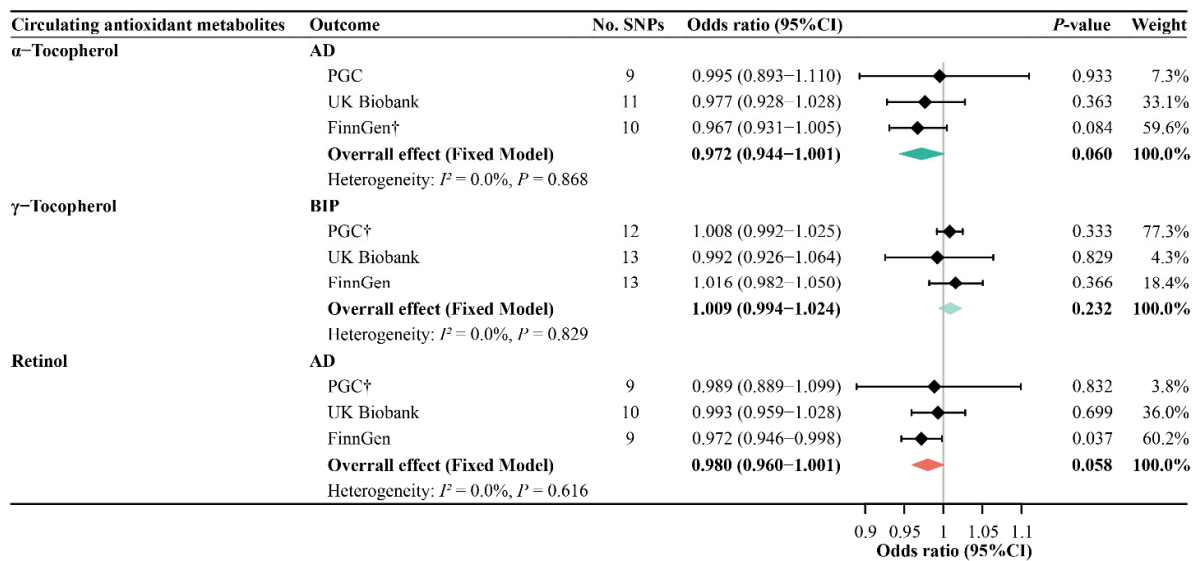

**Figure S3.** The MR analyses for circulating antioxidant metabolites on the risk of major mental disorders after removing outliers. The ORs are scaled per 0.1 unit increase in log-transformed  $\alpha$ -tocopherol and  $\gamma$ -tocopherol, and per unit increase in log-transformed retinol. †: MR analysis results after removing 1 outlier by MR-PRESSO.

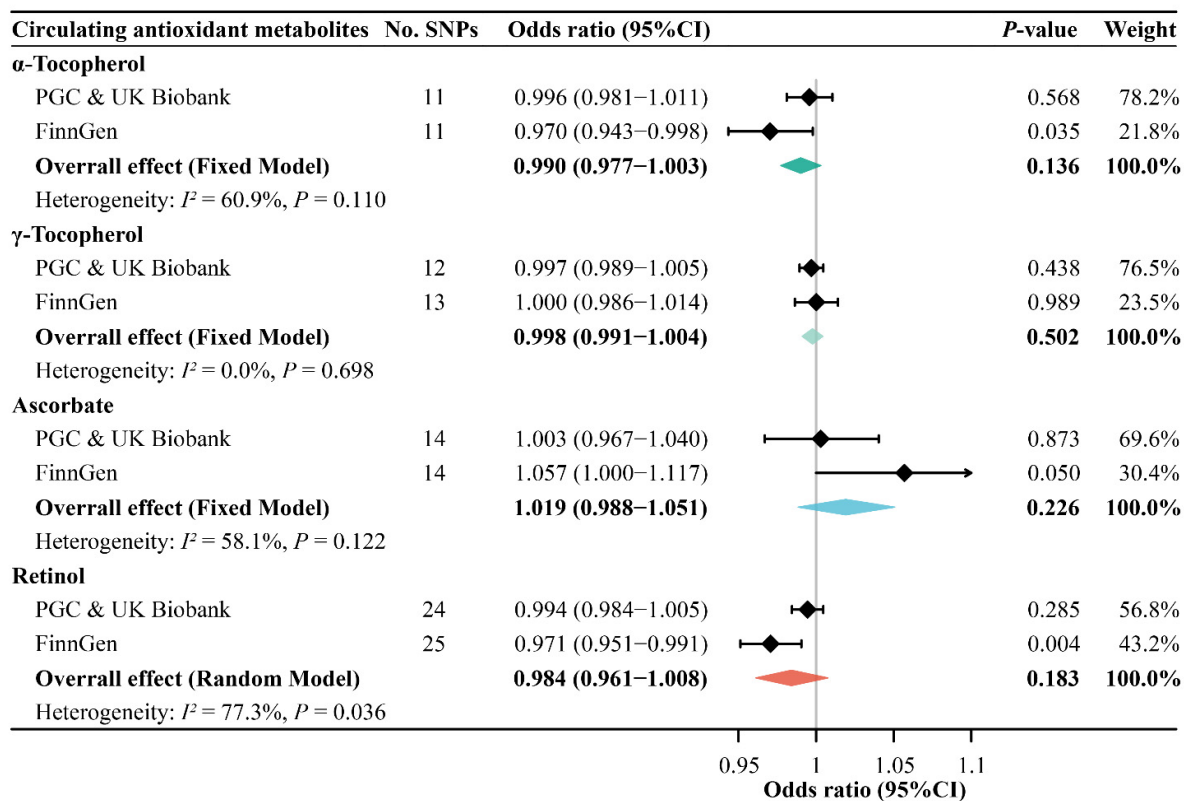

**Figure S4.** The causal effects of four circulating antioxidant metabolites on the risk of depression. The ORs are scaled per 0.1 unit increase in log-transformed  $\alpha$ -tocopherol and  $\gamma$ -tocopherol, and per unit increase in log-transformed ascorbate and retinol
