# Supplementary material for: Dissecting Causal Associations of Diet-Derived Circulating Antioxidants with Six Major Mental Disorders: A Mendelian Randomization Study
Source: Antioxidants (Basel). 2023 Jan 10;12(1):162. doi: 10.3390/antiox12010162 (PMC9855039; doi:10.3390/antiox12010162)
Supplement: Supplementary file 1 [file antioxidants-12-00162-s001.zip › Supplemental Tables S1-S13.pdf]

## Supplementary Tables

### Index

|                                                                                                                                                                                         |    |
|-----------------------------------------------------------------------------------------------------------------------------------------------------------------------------------------|----|
| Table S1. The summary information of the studies used for instrumental variables extraction of absolute circulating antioxidants.....                                                   | 1  |
| Table S2. The summary statistics of the six major mental disorders.....                                                                                                                 | 2  |
| Table S3. Minimum detectable OR with sufficient power in MR analysis.....                                                                                                               | 3  |
| Table S4. The causal effect estimates of the associations between instrumental variables for absolute blood antioxidants and the risk of six major psychiatric disorders.....           | 4  |
| Table S5. The causal effect estimates of the associations between instrumental variables for antioxidant metabolite concentrations and the risk of six major psychiatric disorders..... | 7  |
| Table S6. The MR analysis results of the causal effects of absolute ascorbate levels on major mental disorders. ....                                                                    | 14 |
| Table S7. The MR analysis results of the causal effects of absolute retinol levels on major mental disorders.....                                                                       | 17 |
| Table S8. The MR analysis results of the causal effects of absolute $\beta$ -carotene levels on major mental disorders. ....                                                            | 19 |
| Table S9. The MR analysis results of the causal effects of absolute lycopene levels on major mental disorders. ....                                                                     | 21 |
| Table S10. The MR analysis results of the causal effects of $\alpha$ -tocopherol metabolites on major mental disorders.....                                                             | 24 |
| Table S11. The MR analysis results of the causal effects of $\gamma$ -tocopherol metabolites on major mental disorders. ....                                                            | 27 |
| Table S12. The MR analysis results of the causal effects of ascorbate metabolites on major mental disorders.....                                                                        | 30 |
| Table S13. The MR analysis results of the causal effects of retinol metabolites on major mental disorders. ....                                                                         | 33 |

**Table S1. The summary information of the studies used for instrumental variables extraction of absolute circulating antioxidants.**

| Absolute circulating antioxidants                            | Sample size | Age             | Sex (male) | Antioxidant concentration |
|--------------------------------------------------------------|-------------|-----------------|------------|---------------------------|
| <b><math>\alpha</math>-Tocopherol (mg/L) [1]</b>             |             |                 |            |                           |
| ATBC                                                         | 4,014       | 58.1 $\pm$ 5.0  | 100%       | 11.9 $\pm$ 3.4            |
| <b>Ascorbate (<math>\mu</math>mol/L) [2]</b>                 |             |                 |            |                           |
| Fenland GWAS                                                 | 1,349       | 45 $\pm$ 7      | 44%        | 66.2 $\pm$ 21.3           |
| Fenland UKBB                                                 | 8,391       | 49 $\pm$ 7      | 47%        | 68.6 $\pm$ 21.5           |
| Fenland Core Exome                                           | 1,031       | 51 $\pm$ 7      | 45%        | 68.3 $\pm$ 21.8           |
| InterAct subcohort GWAS                                      | 3,521       | 51 $\pm$ 9      | 35%        | 42.8 $\pm$ 19             |
| InterAct subcohort core-exome                                | 6,504       | 53 $\pm$ 9      | 38%        | 42.9 $\pm$ 19.1           |
| InterAct non-subcohort GWAS                                  | 2,944       | 55 $\pm$ 8      | 48%        | 36.4 $\pm$ 17.6           |
| InterAct non-subcohort core-exome                            | 3,872       | 56 $\pm$ 7      | 52%        | 36.5 $\pm$ 18.9           |
| EPIC-Norfolk GWAS                                            | 16,756      | 59 $\pm$ 9      | 47%        | 53.8 $\pm$ 20.2           |
| EPIC-CVD subcohort                                           | 885         | 53 $\pm$ 12     | 41%        | 41.0 $\pm$ 21.0           |
| EPIC-CVD non-subcohort                                       | 6,765       | 57 $\pm$ 8      | 55%        | 37.9 $\pm$ 20.8           |
| <b>Retinol (<math>\mu</math>g/dL) [3]</b>                    |             |                 |            |                           |
| ATBC                                                         | 4,014       | 58.1 $\pm$ 5.0  | 100%       | 572 (796-654)             |
| PLCO                                                         | 992         | 64.6 $\pm$ 4.9  | 100%       | 672 (562-794)             |
| <b><math>\beta</math>-Carotene (<math>\mu</math>g/L) [4]</b> |             |                 |            |                           |
| NHS                                                          | 2,344       | 58.8 $\pm$ 6.4  | 0%         | 303 $\pm$ 258             |
| <b>Lycopene (<math>\mu</math>g/dL) [5]</b>                   |             |                 |            |                           |
| HAPI                                                         | 441         | 43.1 $\pm$ 13.0 | 58%        | 39.2 $\pm$ 19.9           |

ATBC, Beta-Carotene Cancer Prevention Study; EPIC-Norfolk, the Norfolk arm of the European Prospective Investigation on Cancer study; EPIC, European Prospective Investigation into Cancer and Nutrition; PLCO, Prostate, Lung, Colorectal, and Ovarian Cancer Screening Trial; NHS, the Nurses' Health Study; HAPI, Heredity and Phenotype Intervention Heart Study.

**Table S2. The summary statistics of the six major mental disorders.**

| Trait                    | GWAS data source            | Sample Size | Cases   | Controls | Ancestry      | Publication                  |
|--------------------------|-----------------------------|-------------|---------|----------|---------------|------------------------------|
| <b>Primary outcome</b>   |                             |             |         |          |               |                              |
| AD                       | ANGST Consortium            | 17,310      | 33%     | 67%      | All European  | Otowa et al, 2016[6]         |
| AD                       | UK Biobank-Phecode (300.1)  | 379,635     | 9,705   | 369,930  | All European  | Pan-UKB, 2018                |
| AD                       | FinnGen-F5_ALLANXIOUS       | 297,176     | 18,358  | 278,818  | All European  | Kurki et al, 2022[7]         |
| MDD                      | PGC                         | 173,005     | 59,851  | 113,154  | All European  | Wray et al, 2018[8]          |
| MDD                      | UK Biobank-Phecode (296.22) | 370,408     | 478     | 369,930  | All European  | Pan-UKB, 2018                |
| BIP                      | PGC                         | 413,466     | 41,917  | 371,549  | All European  | Mullins et al, 2021[9]       |
| BIP                      | UK Biobank-Phecode (296.1)  | 371,187     | 1,257   | 369,930  | All European  | Pan-UKB, 2018                |
| BIP                      | FinnGen-F5_BIPO             | 277,143     | 5,763   | 271,380  | All European  | Kurki et al, 2022[7]         |
| SCZ                      | PGC                         | 127,906     | 52,017  | 75,889   | All European  | Trubetskoy et al, 2022[10]   |
| SCZ                      | UK Biobank-Phecode (295.1)  | 370,631     | 701     | 369,930  | All European  | Pan-UKB, 2018                |
| SCZ                      | FinnGen-F5_SCHZPHR          | 303,546     | 6,050   | 297,496  | All European  | Kurki et al, 2022[7]         |
| PTSD                     | PGC                         | 174,659     | 23,212  | 151,447  | ≥90% European | Nievergelt et al, 2019[11]   |
| PTSD                     | UK Biobank-Phecode (300.9)  | 370,117     | 187     | 369,930  | All European  | Pan-UKB, 2018                |
| PTSD                     | FinnGen-F5_PTSD             | 280,457     | 1,639   | 278,818  | All European  | Kurki et al, 2022[7]         |
| OCD                      | IOCDF-GC & OCGAS            | 9,725       | 2,688   | 7,037    | >85% European | IOCDF-GC and OCGAS, 2017[12] |
| OCD                      | UK Biobank-Phecode (300.3)  | 370,123     | 193     | 369,930  | All European  | Pan-UKB, 2018                |
| OCD                      | FinnGen-F5_OCD              | 280,284     | 1,466   | 278,818  | All European  | Kurki et al, 2022[7]         |
| <b>Secondary outcome</b> |                             |             |         |          |               |                              |
| Depression               | PGC & UK Biobank            | 500,199     | 170,756 | 329,443  | All European  | Howard et al, 2019[13]       |
| Depression               | FinnGen-F5_DEPRESSIO        | 305,192     | 33,812  | 271,380  | All European  | Kurki et al, 2022[7]         |

AD, anxiety disorders; MDD, major depressive disorder; BIP, bipolar disorder; SCZ, schizophrenia; PTSD, post-traumatic stress disorder; OCD, obsessive-compulsive disorder; PGC, Psychiatric Genomics Consortium; ANGST, Anxiety NeuroGenetics Study; IOCDF-GC, International Obsessive-Compulsive Disorder Foundation Genetics Collaborative; OCGAS, OCD Collaborative Genetics Association Study.

Pan-UKB project: <https://pan.ukbb.broadinstitute.org/>

FinnGen study: <https://FinnGengen.gitbook.io/documentation/>

**Table S3. Minimum detectable OR with sufficient power in MR analysis.**

| Outcome           | Absolute circulating antioxidants* |             |                   |             | Circulating antioxidant metabolites* |                      |             |             |
|-------------------|------------------------------------|-------------|-------------------|-------------|--------------------------------------|----------------------|-------------|-------------|
|                   | Ascorbate                          | Retinol     | $\beta$ -Carotene | Lycopene    | $\alpha$ -Tocopherol                 | $\gamma$ -Tocopherol | Ascorbate   | Retinol     |
| <b>Primary</b>    |                                    |             |                   |             |                                      |                      |             |             |
| <b>AD</b>         |                                    |             |                   |             |                                      |                      |             |             |
| ANGST             |                                    |             |                   |             |                                      |                      |             |             |
| Consortium        | 0.72 / 1.38                        | 0.75 / 1.33 | 0.82 / 1.22       | 0.92 / 1.09 | 0.84 / 1.18                          | 0.87 / 1.15          | 0.91 / 1.1  | 0.91 / 1.1  |
| UK Biobank        | 0.82 / 1.22                        | 0.84 / 1.19 | 0.88 / 1.13       | 0.95 / 1.05 | 0.99 / 1.01                          | 0.92 / 1.09          | 0.94 / 1.06 | 0.94 / 1.06 |
| FinnGen           | 0.86 / 1.17                        | 0.88 / 1.14 | 0.91 / 1.1        | 0.96 / 1.04 | 0.99 / 1.01                          | 0.94 / 1.07          | 0.96 / 1.05 | 0.96 / 1.05 |
| <b>MDD</b>        |                                    |             |                   |             |                                      |                      |             |             |
| PGC               | 0.9 / 1.11                         | 0.91 / 1.1  | 0.94 / 1.07       | 0.97 / 1.03 | 0.99 / 1.01                          | 0.96 / 1.05          | 0.97 / 1.03 | 0.97 / 1.03 |
| UK Biobank        | 0.5 / 1.99                         | 0.54 / 1.85 | 0.63 / 1.59       | 0.81 / 1.23 | 0.96 / 1.04                          | 0.71 / 1.41          | 0.78 / 1.28 | 0.78 / 1.28 |
| <b>BIP</b>        |                                    |             |                   |             |                                      |                      |             |             |
| PGC               | 0.9 / 1.11                         | 0.91 / 1.1  | 0.94 / 1.07       | 0.97 / 1.03 | 0.99 / 1.01                          | 0.96 / 1.05          | 0.97 / 1.03 | 0.97 / 1.03 |
| UK Biobank        | 0.62 / 1.61                        | 0.66 / 1.52 | 0.74 / 1.36       | 0.87 / 1.14 | 0.97 / 1.03                          | 0.8 / 1.25           | 0.85 / 1.17 | 0.85 / 1.17 |
| FinnGen           | 0.78 / 1.29                        | 0.8 / 1.25  | 0.85 / 1.17       | 0.94 / 1.07 | 0.99 / 1.01                          | 0.89 / 1.12          | 0.93 / 1.08 | 0.92 / 1.08 |
| <b>SCZ</b>        |                                    |             |                   |             |                                      |                      |             |             |
| PGC               | 0.89 / 1.13                        | 0.9 / 1.11  | 0.93 / 1.08       | 0.97 / 1.03 | 0.99 / 1.01                          | 0.95 / 1.05          | 0.97 / 1.04 | 0.97 / 1.04 |
| UK Biobank        | 0.55 / 1.81                        | 0.59 / 1.7  | 0.67 / 1.48       | 0.84 / 1.19 | 0.97 / 1.03                          | 0.75 / 1.34          | 0.81 / 1.23 | 0.81 / 1.23 |
| FinnGen           | 0.78 / 1.28                        | 0.81 / 1.24 | 0.86 / 1.17       | 0.94 / 1.07 | 0.99 / 1.01                          | 0.9 / 1.12           | 0.93 / 1.08 | 0.93 / 1.08 |
| <b>PTSD</b>       |                                    |             |                   |             |                                      |                      |             |             |
| PGC               | 0.87 / 1.15                        | 0.88 / 1.13 | 0.92 / 1.09       | 0.97 / 1.04 | 0.99 / 1.01                          | 0.94 / 1.06          | 0.96 / 1.04 | 0.96 / 1.04 |
| UK Biobank        | 0.39 / 2.57                        | 0.43 / 2.35 | 0.52 / 1.94       | 0.73 / 1.37 | 0.94 / 1.06                          | 0.6 / 1.66           | 0.69 / 1.44 | 0.69 / 1.45 |
| FinnGen           | 0.65 / 1.53                        | 0.69 / 1.46 | 0.76 / 1.32       | 0.89 / 1.13 | 0.98 / 1.02                          | 0.82 / 1.22          | 0.87 / 1.15 | 0.87 / 1.15 |
| <b>OCD</b>        |                                    |             |                   |             |                                      |                      |             |             |
| IOCDF-GC          |                                    |             |                   |             |                                      |                      |             |             |
| & OCGAS           | 0.65 / 1.55                        | 0.68 / 1.46 | 0.76 / 1.31       | 0.89 / 1.12 | 0.98 / 1.02                          | 0.82 / 1.21          | 0.88 / 1.14 | 0.87 / 1.15 |
| UK Biobank        | 0.39 / 2.54                        | 0.43 / 2.33 | 0.73 / 1.37       | 0.52 / 1.92 | 0.94 / 1.06                          | 0.61 / 1.64          | 0.7 / 1.43  | 0.69 / 1.44 |
| FinnGen           | 0.64 / 1.56                        | 0.67 / 1.48 | 0.75 / 1.33       | 0.88 / 1.13 | 0.98 / 1.02                          | 0.81 / 1.23          | 0.86 / 1.16 | 0.86 / 1.16 |
| <b>Secondary</b>  |                                    |             |                   |             |                                      |                      |             |             |
| <b>Depression</b> |                                    |             |                   |             |                                      |                      |             |             |
| PGC & UK          |                                    |             |                   |             |                                      |                      |             |             |
| Biobank           | 0.94 / 1.07                        | 0.95 / 1.06 | 0.96 / 1.04       | 0.98 / 1.02 | 0.99 / 1.01                          | 0.97 / 1.03          | 0.98 / 1.02 | 0.98 / 1.02 |
| UK Biobank        | 0.89 / 1.13                        | 0.9 / 1.11  | 0.93 / 1.07       | 0.97 / 1.03 | 0.99 / 1.01                          | 0.95 / 1.05          | 0.97 / 1.04 | 0.97 / 1.04 |

AD, anxiety disorders; MDD, major depressive disorder; BIP, bipolar disorder; SCZ, schizophrenia; PTSD, post-traumatic stress disorder; OCD, obsessive-compulsive disorder; PGC, Psychiatric Genomics Consortium; ANGST, Anxiety NeuroGenetics Study; IOCDF-GC, International Obsessive-Compulsive Disorder Foundation Genetics Collaborative; OCGAS, OCD Collaborative Genetics Association Study.

\*: The data in the table were the minimum detectable OR (protective effect / risk effect).

**Table S4. The causal effect estimates of the associations between instrumental variables for absolute blood antioxidants and the risk of six major psychiatric disorders.**

| Trait                               | SNP         | Gene     | Effect allele | F   | Exposure |       | Primary outcome |       |        |       |        |       |        |       |        |       |        |       | Depression |       |
|-------------------------------------|-------------|----------|---------------|-----|----------|-------|-----------------|-------|--------|-------|--------|-------|--------|-------|--------|-------|--------|-------|------------|-------|
|                                     |             |          |               |     |          |       | AD              |       | MDD    |       | BIP    |       | SCZ    |       | PTSD   |       | OCD    |       |            |       |
|                                     |             |          |               |     | Beta     | SE    | Beta            | SE    | Beta   | SE    | Beta   | SE    | Beta   | SE    | Beta   | SE    | Beta   | SE    | Beta       | SE    |
| The largest GWAS published to date* |             |          |               |     |          |       |                 |       |        |       |        |       |        |       |        |       |        |       |            |       |
| ascorbate                           | rs10051765  | RGS14    | C             | 31  | 0.039    | 0.007 | -0.002          | 0.031 | -0.001 | 0.009 | 0.000  | 0.010 | -0.014 | 0.009 | 0.001  | 0.016 | -0.003 | 0.037 | -0.001     | 0.005 |
| ascorbate                           | rs10136000  | AKT1     | A             | 33  | 0.040    | 0.007 | -0.061          | 0.044 | 0.003  | 0.010 | 0.020  | 0.011 | 0.017  | 0.010 | -0.009 | 0.018 | 0.054  | 0.045 | 0.001      | 0.005 |
| ascorbate                           | rs117885456 | SNRPF    | A             | 42  | 0.078    | 0.012 | 0.020           | 0.075 | -0.022 | 0.016 | 0.010  | 0.017 | -0.007 | 0.016 | 0.012  | 0.030 | 0.054  | 0.077 | -0.010     | 0.008 |
| ascorbate                           | rs13028225  | SLC23A3  | T             | 128 | 0.102    | 0.009 | 0.015           | 0.040 | -0.010 | 0.012 | 0.013  | 0.014 | -0.031 | 0.013 | -0.003 | 0.021 | 0.070  | 0.050 | -0.005     | 0.006 |
| ascorbate                           | rs174547    | FADS1    | C             | 26  | 0.036    | 0.007 | -0.008          | 0.030 | 0.020  | 0.008 | 0.068  | 0.010 | 0.024  | 0.009 | -0.003 | 0.016 | 0.015  | 0.036 | 0.015      | 0.005 |
| ascorbate                           | rs2559850   | CHPT1    | A             | 93  | 0.058    | 0.006 | -0.014          | 0.028 | 0.016  | 0.008 | 0.004  | 0.010 | 0.015  | 0.009 | 0.014  | 0.015 | -0.027 | 0.035 | 0.002      | 0.004 |
| ascorbate                           | rs33972313  | SLC23A1  | C             | 400 | 0.360    | 0.018 | -0.097          | 0.105 | -0.015 | 0.022 | -0.029 | 0.027 | -0.035 | 0.025 | -0.022 | 0.042 | 0.031  | 0.103 | 0.004      | 0.012 |
| ascorbate                           | rs56738967  | MAF      | C             | 34  | 0.041    | 0.007 | 0.010           | 0.028 | 0.001  | 0.008 | 0.000  | 0.010 | -0.011 | 0.009 | 0.020  | 0.016 | -0.070 | 0.036 | 0.007      | 0.005 |
| ascorbate                           | rs6693447   | RER1     | T             | 42  | 0.039    | 0.006 | -0.014          | 0.030 | 0.015  | 0.009 | 0.007  | 0.010 | -0.016 | 0.009 | 0.011  | 0.015 | 0.012  | 0.034 | 0.002      | 0.005 |
| ascorbate                           | rs9895661   | BCAS3    | T             | 62  | 0.063    | 0.008 | -0.073          | 0.042 | 0.004  | 0.011 | 0.005  | 0.012 | -0.004 | 0.011 | 0.010  | 0.019 | 0.013  | 0.044 | 0.012      | 0.006 |
| retinol                             | rs10882272  | RBP4     | C             | 56  | -0.030   | 0.004 | 0.051           | 0.031 | 0.002  | 0.008 | -0.004 | 0.010 | -0.012 | 0.009 | -0.023 | 0.015 | -0.010 | 0.034 | 0.006      | 0.004 |
| retinol                             | rs1667255   | TTR      | C             | 56  | 0.030    | 0.004 | -0.009          | 0.027 | 0.017  | 0.008 | -0.008 | 0.010 | 0.012  | 0.008 | 0.008  | 0.015 | 0.040  | 0.034 | 0.011      | 0.004 |
| carotene                            | rs6564851   | BCMO1    | G             | 99  | 0.149    | 0.015 | 0.049           | 0.027 | 0.006  | 0.008 | -0.008 | 0.009 | 0.003  | 0.009 | -0.010 | 0.015 | -0.042 | 0.034 | 0.003      | 0.004 |
| carotene                            | rs7501331   | BCMO1    | T             | 18  | -0.067   | 0.016 | -0.003          | 0.034 | 0.014  | 0.009 | 0.003  | 0.011 | 0.000  | 0.010 | 0.013  | 0.017 | -0.032 | 0.041 | 0.008      | 0.005 |
| lycopene                            | rs2232315   | G6PC2    | A             | 24  | 0.740    | 0.150 | -               | -     | -0.039 | 0.036 | -0.041 | 0.043 | -0.026 | 0.036 | -0.026 | 0.070 | -0.235 | 0.230 | -0.016     | 0.017 |
| lycopene                            | rs341075    | -        | A             | 26  | -0.870   | 0.170 | 0.053           | 0.060 | 0.006  | 0.025 | -0.039 | 0.028 | 0.020  | 0.026 | -0.006 | 0.047 | -0.131 | 0.103 | 0.007      | 0.013 |
| lycopene                            | rs4635297   | BC039545 | A             | 27  | 0.260    | 0.050 | 0.029           | 0.042 | 0.036  | 0.011 | -0.011 | 0.013 | 0.024  | 0.012 | 0.007  | 0.021 | 0.044  | 0.044 | 0.010      | 0.006 |
| lycopene                            | rs6108801   | -        | C             | 28  | -0.480   | 0.090 | 0.046           | 0.039 | -0.011 | 0.022 | -0.008 | 0.027 | 0.011  | 0.025 | 0.011  | 0.041 | 0.043  | 0.097 | -0.006     | 0.012 |
| lycopene                            | rs7680948   | SETD7    | A             | 40  | -0.190   | 0.030 | -0.050          | 0.033 | -0.015 | 0.009 | 0.003  | 0.011 | -0.006 | 0.010 | -0.002 | 0.017 | 0.034  | 0.040 | -0.003     | 0.005 |
| UK Biobank                          |             |          |               |     |          |       |                 |       |        |       |        |       |        |       |        |       |        |       |            |       |
| ascorbate                           | rs10051765  | RGS14    | C             | 31  | 0.039    | 0.007 | -0.009          | 0.016 | 0.198  | 0.069 | -0.020 | 0.043 | 0.039  | 0.057 | 0.108  | 0.110 | 0.083  | 0.108 | -          | -     |
| ascorbate                           | rs10136000  | AKT1     | A             | 33  | 0.040    | 0.007 | -0.018          | 0.016 | 0.021  | 0.072 | -0.065 | 0.045 | -0.001 | 0.060 | -0.126 | 0.115 | 0.059  | 0.114 | -          | -     |

|           |             |          |   |     |        |       |        |       |        |       |        |       |        |       |        |       |        |       |   |   |
|-----------|-------------|----------|---|-----|--------|-------|--------|-------|--------|-------|--------|-------|--------|-------|--------|-------|--------|-------|---|---|
| ascorbate | rs117885456 | SNRPF    | A | 42  | 0.078  | 0.012 | -0.003 | 0.026 | -0.034 | 0.115 | 0.033  | 0.072 | 0.261  | 0.095 | 0.192  | 0.183 | -0.235 | 0.181 | - | - |
| ascorbate | rs13028225  | SLC23A3  | T | 128 | 0.102  | 0.009 | -0.013 | 0.021 | -0.044 | 0.093 | -0.035 | 0.058 | 0.061  | 0.077 | 0.199  | 0.149 | -0.162 | 0.147 | - | - |
| ascorbate | rs174547    | FADS1    | C | 26  | 0.036  | 0.007 | 0.005  | 0.015 | 0.018  | 0.068 | 0.049  | 0.042 | 0.052  | 0.056 | 0.126  | 0.109 | -0.029 | 0.107 | - | - |
| ascorbate | rs2559850   | CHPT1    | A | 93  | 0.058  | 0.006 | -0.001 | 0.015 | -0.059 | 0.067 | 0.016  | 0.042 | -0.145 | 0.055 | 0.042  | 0.106 | -0.026 | 0.105 | - | - |
| ascorbate | rs33972313  | SLC23A1  | C | 400 | 0.360  | 0.018 | -0.035 | 0.040 | 0.357  | 0.176 | -0.164 | 0.110 | -0.080 | 0.146 | 0.087  | 0.281 | 0.349  | 0.276 | - | - |
| ascorbate | rs56738967  | MAF      | C | 34  | 0.041  | 0.007 | -0.006 | 0.016 | 0.068  | 0.070 | 0.072  | 0.043 | 0.001  | 0.058 | -0.052 | 0.111 | -0.163 | 0.110 | - | - |
| ascorbate | rs6693447   | RER1     | T | 42  | 0.039  | 0.006 | -0.002 | 0.015 | 0.193  | 0.065 | 0.010  | 0.041 | 0.038  | 0.054 | 0.082  | 0.104 | -0.072 | 0.102 | - | - |
| ascorbate | rs9895661   | BCAS3    | T | 62  | 0.063  | 0.008 | 0.025  | 0.020 | 0.024  | 0.086 | 0.036  | 0.054 | 0.076  | 0.072 | 0.039  | 0.138 | 0.153  | 0.136 | - | - |
| retinol   | rs10882272  | RBP4     | C | 56  | -0.030 | 0.004 | 0.019  | 0.015 | 0.078  | 0.067 | 0.085  | 0.042 | -0.027 | 0.055 | -0.121 | 0.106 | -0.036 | 0.105 | - | - |
| retinol   | rs1667255   | TTR      | C | 56  | 0.030  | 0.004 | 0.013  | 0.015 | -0.048 | 0.067 | 0.006  | 0.042 | -0.041 | 0.055 | 0.090  | 0.106 | -0.107 | 0.105 | - | - |
| carotene  | rs6564851   | BCMO1    | G | 99  | 0.149  | 0.015 | 0.024  | 0.015 | 0.057  | 0.065 | -0.055 | 0.040 | -0.026 | 0.054 | 0.263  | 0.104 | 0.018  | 0.102 | - | - |
| carotene  | rs7501331   | BCMO1    | T | 18  | -0.067 | 0.016 | 0.007  | 0.017 | -0.005 | 0.076 | -0.007 | 0.047 | 0.076  | 0.063 | 0.016  | 0.121 | -0.164 | 0.119 | - | - |
| lycopene  | rs2232315   | G6PC2    | A | 24  | 0.740  | 0.150 | 0.044  | 0.054 | 0.051  | 0.238 | -0.319 | 0.148 | -0.359 | 0.198 | -0.152 | 0.379 | 0.247  | 0.375 | - | - |
| lycopene  | rs341075    | -        | A | 26  | -0.870 | 0.170 | -0.040 | 0.044 | -0.434 | 0.191 | -0.061 | 0.120 | -0.086 | 0.159 | -0.383 | 0.306 | 0.390  | 0.302 | - | - |
| lycopene  | rs4635297   | BC039545 | A | 27  | 0.260  | 0.050 | 0.012  | 0.019 | -0.005 | 0.083 | -0.005 | 0.052 | 0.003  | 0.068 | 0.027  | 0.132 | 0.108  | 0.130 | - | - |
| lycopene  | rs6108801   | -        | C | 28  | -0.480 | 0.090 | -0.011 | 0.040 | -0.048 | 0.174 | 0.013  | 0.109 | -0.120 | 0.144 | 0.030  | 0.278 | 0.453  | 0.275 | - | - |
| lycopene  | rs7680948   | SETD7    | A | 40  | -0.190 | 0.030 | 0.004  | 0.017 | -0.018 | 0.073 | 0.036  | 0.045 | 0.011  | 0.060 | 0.053  | 0.116 | 0.098  | 0.115 | - | - |

#### FinnGen study

|           |             |         |   |     |        |       |        |       |   |   |        |       |        |       |        |       |        |       |        |       |
|-----------|-------------|---------|---|-----|--------|-------|--------|-------|---|---|--------|-------|--------|-------|--------|-------|--------|-------|--------|-------|
| ascorbate | rs10051765  | RGS14   | C | 31  | 0.039  | 0.007 | 0.001  | 0.011 | - | - | 0.037  | 0.021 | 0.026  | 0.029 | -0.068 | 0.036 | -0.007 | 0.038 | 0.009  | 0.009 |
| ascorbate | rs10136000  | AKT1    | A | 33  | 0.040  | 0.007 | 0.007  | 0.012 | - | - | -0.015 | 0.023 | -0.002 | 0.031 | 0.033  | 0.039 | 0.019  | 0.041 | -0.004 | 0.009 |
| ascorbate | rs117885456 | SNRPF   | A | 42  | 0.078  | 0.012 | -0.002 | 0.020 | - | - | 0.044  | 0.038 | 0.062  | 0.052 | -0.075 | 0.065 | -0.061 | 0.069 | -0.007 | 0.015 |
| ascorbate | rs13028225  | SLC23A3 | T | 128 | 0.102  | 0.009 | -0.005 | 0.016 | - | - | 0.032  | 0.028 | -0.033 | 0.039 | -0.066 | 0.049 | 0.027  | 0.052 | 0.008  | 0.012 |
| ascorbate | rs174547    | FADS1   | C | 26  | 0.036  | 0.007 | 0.023  | 0.011 | - | - | 0.090  | 0.021 | -0.019 | 0.028 | 0.032  | 0.036 | 0.075  | 0.038 | 0.034  | 0.009 |
| ascorbate | rs2559850   | CHPT1   | A | 93  | 0.058  | 0.006 | 0.023  | 0.011 | - | - | 0.010  | 0.021 | 0.002  | 0.029 | 0.002  | 0.036 | 0.044  | 0.038 | 0.015  | 0.009 |
| ascorbate | rs33972313  | SLC23A1 | C | 400 | 0.360  | 0.018 | 0.027  | 0.038 | - | - | -0.135 | 0.070 | -0.049 | 0.098 | 0.214  | 0.120 | 0.065  | 0.127 | 0.012  | 0.029 |
| ascorbate | rs56738967  | MAF     | C | 34  | 0.041  | 0.007 | 0.012  | 0.012 | - | - | -0.018 | 0.022 | -0.039 | 0.030 | 0.018  | 0.038 | 0.016  | 0.041 | -0.009 | 0.009 |
| ascorbate | rs6693447   | RER1    | T | 42  | 0.039  | 0.006 | -0.011 | 0.011 | - | - | 0.009  | 0.021 | 0.021  | 0.028 | -0.053 | 0.035 | -0.065 | 0.038 | 0.010  | 0.009 |
| ascorbate | rs9895661   | BCAS3   | T | 62  | 0.063  | 0.008 | -0.003 | 0.014 | - | - | -0.023 | 0.026 | -0.032 | 0.036 | -0.025 | 0.045 | 0.039  | 0.048 | -0.006 | 0.011 |
| retinol   | rs10882272  | RBP4    | C | 56  | -0.030 | 0.004 | 0.031  | 0.012 | - | - | -0.013 | 0.021 | 0.060  | 0.029 | 0.056  | 0.037 | 0.013  | 0.039 | -0.001 | 0.009 |

|          |           |          |   |    |        |       |        |       |   |   |        |       |        |       |        |       |        |       |        |       |
|----------|-----------|----------|---|----|--------|-------|--------|-------|---|---|--------|-------|--------|-------|--------|-------|--------|-------|--------|-------|
| retinol  | rs1667255 | TTR      | C | 56 | 0.030  | 0.004 | 0.021  | 0.012 | - | - | 0.007  | 0.023 | 0.048  | 0.031 | 0.005  | 0.039 | -0.012 | 0.042 | 0.023  | 0.009 |
| carotene | rs6564851 | BCMO1    | G | 99 | 0.149  | 0.015 | 0.000  | 0.012 | - | - | -0.016 | 0.021 | 0.028  | 0.029 | 0.042  | 0.036 | -0.035 | 0.039 | -0.011 | 0.009 |
| carotene | rs7501331 | BCMO1    | T | 18 | -0.067 | 0.016 | 0.000  | 0.012 | - | - | -0.006 | 0.022 | -0.032 | 0.031 | -0.025 | 0.038 | -0.061 | 0.041 | 0.012  | 0.009 |
| lycopene | rs2232315 | G6PC2    | A | 24 | 0.740  | 0.150 | -0.156 | 0.079 | - | - | -0.052 | 0.142 | 0.089  | 0.195 | 0.153  | 0.249 | -0.296 | 0.260 | -0.067 | 0.060 |
| lycopene | rs341075  | -        | A | 26 | -0.870 | 0.170 | 0.040  | 0.030 | - | - | 0.014  | 0.055 | -0.053 | 0.076 | 0.004  | 0.095 | -0.005 | 0.100 | 0.000  | 0.022 |
| lycopene | rs4635297 | BC039545 | A | 27 | 0.260  | 0.050 | -0.021 | 0.015 | - | - | -0.002 | 0.027 | 0.086  | 0.037 | 0.028  | 0.046 | -0.025 | 0.049 | -0.002 | 0.011 |
| lycopene | rs6108801 | -        | C | 28 | -0.480 | 0.090 | 0.042  | 0.050 | - | - | -0.059 | 0.092 | -0.047 | 0.128 | -0.183 | 0.160 | 0.018  | 0.171 | 0.047  | 0.038 |
| lycopene | rs7680948 | SETD7    | A | 40 | -0.190 | 0.030 | 0.005  | 0.013 | - | - | 0.026  | 0.024 | 0.059  | 0.033 | 0.038  | 0.042 | 0.050  | 0.044 | 0.021  | 0.010 |

AD, anxiety disorders; MDD, major depressive disorder; BIP, bipolar disorder; SCZ, schizophrenia; PTSD, post-traumatic stress disorder; OCD, obsessive-compulsive disorder;

\*: The largest GWAS study to date for AD from ANGST Consortium, for MDD, BIP, SCZ and PTSD from PGC, and for OCD from IOCDF-GC & OCGAS. The following table S5 description is the same as this table description

**Table S5. The causal effect estimates of the associations between instrumental variables for antioxidant metabolite concentrations and the risk of six major psychiatric disorders.**

| Trait                               | SNP        | Gene          | Effect allele | F  | Exposure |       | Primary outcome |       |        |       |        |       |        |       |        |       |        |       | Depression |       |
|-------------------------------------|------------|---------------|---------------|----|----------|-------|-----------------|-------|--------|-------|--------|-------|--------|-------|--------|-------|--------|-------|------------|-------|
|                                     |            |               |               |    |          |       | AD              |       | MDD    |       | BIP    |       | SCZ    |       | PTSD   |       | OCD    |       |            |       |
|                                     |            |               |               |    | Beta     | SE    | Beta            | SE    | Beta   | SE    | Beta   | SE    | Beta   | SE    | Beta   | SE    | Beta   | SE    | Beta       | SE    |
| The largest GWAS published to date* |            |               |               |    |          |       |                 |       |        |       |        |       |        |       |        |       |        |       |            |       |
| α-tocopherol                        | rs10163969 | -             | T             | 19 | -0.035   | 0.008 | 0.043           | 0.142 | 0.044  | 0.022 | 0.016  | 0.022 | 0.003  | 0.020 | 0.062  | 0.037 | 0.096  | 0.080 | 0.003      | 0.011 |
| α-tocopherol                        | rs10245705 | LOC105375199  | T             | 27 | -0.066   | 0.013 | -               | -     | 0.013  | 0.032 | -0.010 | 0.037 | 0.064  | 0.033 | -0.031 | 0.057 | -0.224 | 0.140 | 0.004      | 0.016 |
| α-tocopherol                        | rs10935814 | -             | A             | 20 | -0.037   | 0.008 | -0.015          | 0.045 | -0.006 | 0.012 | -0.007 | 0.014 | 0.011  | 0.013 | -0.009 | 0.023 | -0.003 | 0.052 | -0.004     | 0.007 |
| α-tocopherol                        | rs11145330 | -             | C             | 23 | -0.032   | 0.007 | -0.028          | 0.041 | -0.003 | 0.012 | 0.015  | 0.015 | 0.006  | 0.014 | -0.042 | 0.023 | 0.040  | 0.054 | 0.000      | 0.007 |
| α-tocopherol                        | rs11992435 | -             | G             | 21 | -0.033   | 0.007 | -0.002          | 0.067 | -0.006 | 0.017 | -0.036 | 0.020 | -0.001 | 0.018 | 0.032  | 0.032 | -0.073 | 0.071 | -0.005     | 0.009 |
| α-tocopherol                        | rs1404410  | -             | G             | 21 | 0.024    | 0.005 | 0.009           | 0.032 | -0.002 | 0.010 | 0.014  | 0.011 | 0.025  | 0.011 | 0.017  | 0.018 | 0.016  | 0.041 | 0.000      | 0.005 |
| α-tocopherol                        | rs1532701  | SLC6A2        | A             | 21 | 0.014    | 0.003 | -0.025          | 0.026 | 0.007  | 0.008 | -0.004 | 0.009 | -0.011 | 0.009 | 0.005  | 0.015 | -0.011 | 0.034 | 0.000      | 0.004 |
| α-tocopherol                        | rs2074731  | SF3A1         | A             | 22 | -0.018   | 0.004 | 0.043           | 0.035 | 0.011  | 0.011 | 0.004  | 0.012 | -0.001 | 0.011 | -0.014 | 0.020 | 0.058  | 0.044 | 0.010      | 0.006 |
| α-tocopherol                        | rs261342   | LIPC/LIPC-AS1 | C             | 21 | -0.017   | 0.004 | -0.023          | 0.036 | -0.005 | 0.010 | -0.013 | 0.011 | -0.016 | 0.010 | 0.000  | 0.018 | -0.005 | 0.041 | 0.004      | 0.005 |
| α-tocopherol                        | rs7238006  | -             | C             | 24 | -0.028   | 0.006 | 0.021           | 0.050 | -0.020 | 0.015 | -0.008 | 0.017 | -0.004 | 0.016 | 0.012  | 0.027 | 0.128  | 0.062 | 0.000      | 0.008 |
| α-tocopherol                        | rs7930821  | ZDHHC13       | T             | 20 | 0.067    | 0.015 | -               | -     | -0.019 | 0.026 | 0.010  | 0.031 | -0.033 | 0.029 | 0.025  | 0.051 | -0.242 | 0.119 | -0.011     | 0.015 |
| γ-tocopherol                        | rs10077932 | -             | T             | 21 | -0.040   | 0.009 | 0.036           | 0.041 | 0.000  | 0.011 | -0.033 | 0.012 | -0.003 | 0.011 | -0.031 | 0.020 | 0.029  | 0.048 | -0.012     | 0.006 |
| γ-tocopherol                        | rs1013104  | -             | T             | 21 | -0.021   | 0.005 | -0.053          | 0.026 | -0.007 | 0.008 | 0.003  | 0.009 | 0.000  | 0.009 | -0.033 | 0.015 | -0.030 | 0.034 | 0.003      | 0.004 |
| γ-tocopherol                        | rs10466757 | BCAT1         | T             | 20 | -0.063   | 0.014 | -0.023          | 0.030 | 0.016  | 0.009 | -0.022 | 0.011 | -0.015 | 0.010 | -0.015 | 0.018 | -0.002 | 0.038 | 0.007      | 0.005 |
| γ-tocopherol                        | rs10492212 | -             | T             | 20 | -0.027   | 0.006 | 0.059           | 0.038 | 0.019  | 0.011 | -0.005 | 0.013 | 0.005  | 0.012 | -0.016 | 0.020 | 0.106  | 0.043 | -0.006     | 0.006 |
| γ-tocopherol                        | rs10520845 | MYO10         | A             | 21 | 0.191    | 0.042 | -               | -     | -0.064 | 0.036 | -0.086 | 0.039 | -0.022 | 0.036 | -0.014 | 0.063 | -0.053 | 0.128 | -0.004     | 0.019 |
| γ-tocopherol                        | rs1060467  | CYP4F11       | G             | 27 | -0.023   | 0.005 | -0.058          | 0.027 | -0.009 | 0.008 | -0.015 | 0.010 | 0.007  | 0.009 | 0.010  | 0.015 | -0.020 | 0.034 | -0.007     | 0.004 |
| γ-tocopherol                        | rs13336771 | LONP2         | A             | 20 | 0.062    | 0.014 | -0.039          | 0.036 | -0.008 | 0.011 | -0.013 | 0.013 | -0.011 | 0.012 | 0.000  | 0.020 | -0.017 | 0.044 | -0.014     | 0.006 |
| γ-tocopherol                        | rs261301   | -             | C             | 23 | -0.032   | 0.007 | -0.031          | 0.041 | -0.013 | 0.011 | -0.007 | 0.014 | 0.005  | 0.012 | 0.020  | 0.021 | -0.063 | 0.049 | -0.003     | 0.006 |
| γ-tocopherol                        | rs2794327  | MEGF6         | T             | 20 | -0.036   | 0.008 | -0.016          | 0.051 | 0.004  | 0.010 | -0.009 | 0.011 | 0.001  | 0.010 | 0.002  | 0.018 | -0.033 | 0.041 | -          | -     |
| γ-tocopherol                        | rs5994305  | SEC14L2       | G             | 25 | -0.031   | 0.006 | 0.061           | 0.034 | 0.005  | 0.011 | 0.007  | 0.012 | -0.003 | 0.011 | -0.022 | 0.020 | 0.066  | 0.044 | 0.009      | 0.006 |
| γ-tocopherol                        | rs6821770  | SORCS2        | A             | 20 | 0.038    | 0.009 | -0.047          | 0.048 | -0.012 | 0.011 | 0.008  | 0.012 | 0.017  | 0.011 | -0.009 | 0.019 | -0.076 | 0.046 | 0.001      | 0.006 |

|              |             |              |   |    |        |       |        |       |        |       |        |       |        |       |        |       |        |       |        |       |
|--------------|-------------|--------------|---|----|--------|-------|--------|-------|--------|-------|--------|-------|--------|-------|--------|-------|--------|-------|--------|-------|
| γ-tocopherol | rs7038957   | -            | C | 21 | 0.029  | 0.006 | 0.052  | 0.037 | 0.000  | 0.011 | 0.035  | 0.013 | 0.012  | 0.012 | 0.013  | 0.020 | -0.056 | 0.045 | -0.001 | 0.006 |
| γ-tocopherol | rs7350776   | RYR3         | G | 21 | -0.024 | 0.005 | 0.003  | 0.031 | 0.005  | 0.009 | 0.002  | 0.010 | 0.016  | 0.009 | 0.005  | 0.016 | -0.042 | 0.037 | -0.005 | 0.005 |
| ascorbate    | rs11167905  | -            | C | 24 | -0.080 | 0.016 | 0.030  | 0.038 | 0.005  | 0.011 | 0.041  | 0.013 | 0.003  | 0.012 | 0.001  | 0.021 | -0.043 | 0.048 | 0.003  | 0.006 |
| ascorbate    | rs13069990  | LSAMP        | T | 21 | -0.051 | 0.011 | 0.036  | 0.027 | 0.009  | 0.008 | 0.007  | 0.010 | 0.020  | 0.009 | -0.003 | 0.015 | -0.075 | 0.035 | -0.001 | 0.004 |
| ascorbate    | rs13103690  | SLC2A9       | G | 21 | 0.047  | 0.010 | 0.043  | 0.029 | 0.019  | 0.008 | 0.004  | 0.009 | 0.012  | 0.009 | 0.021  | 0.015 | 0.029  | 0.034 | 0.009  | 0.005 |
| ascorbate    | rs2070006   | FGA          | C | 21 | -0.051 | 0.011 | -0.023 | 0.028 | -0.002 | 0.008 | 0.000  | 0.010 | 0.003  | 0.009 | 0.002  | 0.015 | -0.009 | 0.034 | -0.004 | 0.004 |
| ascorbate    | rs577596    | -            | A | 25 | -0.057 | 0.011 | -0.011 | 0.038 | -0.006 | 0.009 | 0.001  | 0.011 | -0.002 | 0.010 | 0.025  | 0.017 | -0.027 | 0.038 | -0.001 | 0.005 |
| ascorbate    | rs6713914   | LOC105374754 | C | 26 | -0.059 | 0.012 | -0.042 | 0.027 | -0.006 | 0.008 | -0.005 | 0.009 | 0.006  | 0.009 | 0.001  | 0.015 | -0.079 | 0.034 | -0.006 | 0.004 |
| ascorbate    | rs6826474   | -            | T | 23 | -0.138 | 0.029 | -0.033 | 0.135 | 0.028  | 0.023 | 0.005  | 0.027 | -0.003 | 0.024 | 0.069  | 0.041 | -0.021 | 0.087 | 0.018  | 0.013 |
| ascorbate    | rs6834631   | LOC107986309 | G | 24 | -0.131 | 0.027 | -0.091 | 0.133 | -0.015 | 0.019 | -0.004 | 0.023 | 0.006  | 0.022 | -0.012 | 0.037 | -0.100 | 0.087 | -0.027 | 0.011 |
| ascorbate    | rs7112460   | HYLS1        | T | 24 | 0.108  | 0.022 | 0.070  | 0.055 | 0.013  | 0.016 | -0.017 | 0.019 | -0.001 | 0.018 | 0.009  | 0.030 | -0.037 | 0.070 | 0.011  | 0.009 |
| ascorbate    | rs8057559   | ZFHX3        | T | 20 | 0.140  | 0.031 | -      | -     | 0.007  | 0.026 | 0.047  | 0.031 | -0.014 | 0.028 | 0.083  | 0.046 | 0.242  | 0.102 | -0.011 | 0.013 |
| ascorbate    | rs808686    | -            | A | 22 | 0.060  | 0.013 | 0.017  | 0.027 | 0.011  | 0.008 | -0.001 | 0.010 | 0.010  | 0.009 | 0.027  | 0.015 | 0.067  | 0.034 | 0.002  | 0.004 |
| ascorbate    | rs8105491   | -            | T | 22 | -0.070 | 0.015 | -0.025 | 0.037 | 0.015  | 0.011 | -0.004 | 0.013 | 0.021  | 0.012 | 0.007  | 0.021 | 0.003  | 0.046 | 0.007  | 0.006 |
| ascorbate    | rs9419004   | ADGRA1       | C | 20 | -0.254 | 0.056 | -0.018 | 0.061 | -0.019 | 0.014 | -0.012 | 0.013 | -0.002 | 0.011 | 0.035  | 0.020 | -0.015 | 0.062 | 0.004  | 0.005 |
| ascorbate    | rs9606290   | LOC105372863 | A | 20 | 0.159  | 0.035 | 0.028  | 0.042 | 0.012  | 0.011 | 0.027  | 0.012 | 0.016  | 0.011 | 0.008  | 0.019 | 0.023  | 0.038 | 0.008  | 0.005 |
| retinol      | rs10019071  | -            | A | 17 | 0.657  | 0.161 | -      | -     | -0.011 | 0.037 | -0.055 | 0.043 | 0.025  | 0.036 | 0.066  | 0.076 | -0.150 | 0.159 | 0.004  | 0.017 |
| retinol      | rs112293959 | ZFAND6       | G | 11 | -0.429 | 0.130 | 0.043  | 0.198 | -0.005 | 0.025 | 0.035  | 0.030 | -0.007 | 0.029 | 0.024  | 0.045 | -0.103 | 0.123 | -0.016 | 0.013 |
| retinol      | rs114515641 | IGSF11       | G | 10 | 0.414  | 0.129 | 0.250  | 0.157 | 0.030  | 0.022 | -0.029 | 0.026 | 0.007  | 0.024 | -0.027 | 0.041 | -0.133 | 0.094 | 0.014  | 0.012 |
| retinol      | rs1153379   | -            | A | 15 | -0.323 | 0.083 | -0.061 | 0.128 | 0.033  | 0.024 | 0.005  | 0.024 | 0.021  | 0.023 | 0.020  | 0.044 | -0.005 | 0.117 | 0.023  | 0.009 |
| retinol      | rs117468033 | -            | T | 26 | -0.961 | 0.188 | -      | -     | 0.065  | 0.062 | -0.080 | 0.059 | -0.037 | 0.062 | -      | -     | -      | -     | -      | -     |
| retinol      | rs1176744   | HTR3B        | C | 21 | -0.207 | 0.045 | 0.008  | 0.028 | -0.002 | 0.008 | -0.012 | 0.010 | -0.002 | 0.009 | 0.000  | 0.016 | -0.017 | 0.036 | 0.005  | 0.005 |
| retinol      | rs118025446 | CEP162       | A | 17 | -0.481 | 0.115 | 0.137  | 0.158 | -0.011 | 0.021 | -0.001 | 0.024 | 0.040  | 0.022 | -0.023 | 0.037 | -0.010 | 0.087 | 0.000  | 0.011 |
| retinol      | rs12955464  | -            | G | 15 | -0.234 | 0.061 | -0.055 | 0.068 | -0.007 | 0.013 | 0.001  | 0.015 | -0.014 | 0.013 | 0.032  | 0.035 | 0.026  | 0.059 | -0.006 | 0.006 |
| retinol      | rs139726207 | -            | G | 11 | 0.370  | 0.110 | 0.120  | 0.055 | -0.011 | 0.016 | 0.015  | 0.018 | 0.003  | 0.017 | -0.012 | 0.032 | -0.106 | 0.063 | -0.004 | 0.009 |
| retinol      | rs149113848 | -            | G | 13 | -0.964 | 0.265 | -      | -     | 0.037  | 0.066 | -      | -     | -      | -     | -      | -     | -0.161 | 0.248 | 0.006  | 0.026 |
| retinol      | rs149478645 | CTTNBP2      | G | 13 | -0.507 | 0.142 | -      | -     | 0.017  | 0.031 | -0.050 | 0.038 | 0.014  | 0.033 | 0.036  | 0.053 | -0.145 | 0.146 | 0.002  | 0.015 |
| retinol      | rs17005512  | -            | C | 13 | -0.218 | 0.060 | -0.018 | 0.036 | 0.017  | 0.011 | -0.011 | 0.013 | -0.003 | 0.012 | -0.013 | 0.020 | 0.026  | 0.045 | 0.001  | 0.006 |
| retinol      | rs1842947   | OR3A3        | G | 20 | -0.192 | 0.043 | 0.058  | 0.031 | 0.018  | 0.008 | 0.019  | 0.010 | -0.008 | 0.009 | -0.009 | 0.015 | 0.014  | 0.035 | 0.003  | 0.004 |

|         |             |              |   |    |        |       |        |       |        |       |        |       |        |       |        |       |        |       |        |       |
|---------|-------------|--------------|---|----|--------|-------|--------|-------|--------|-------|--------|-------|--------|-------|--------|-------|--------|-------|--------|-------|
| retinol | rs2147337   | SIRPG        | G | 13 | 0.158  | 0.044 | -0.051 | 0.028 | 0.003  | 0.008 | 0.004  | 0.010 | -0.027 | 0.009 | 0.015  | 0.016 | 0.028  | 0.036 | -0.001 | 0.005 |
| retinol | rs2367816   | LOC105374455 | G | 20 | 0.228  | 0.051 | 0.007  | 0.031 | -0.012 | 0.009 | 0.011  | 0.011 | 0.004  | 0.010 | 0.019  | 0.017 | 0.071  | 0.040 | -0.005 | 0.005 |
| retinol | rs2417325   | -            | T | 15 | 0.329  | 0.084 | -0.077 | 0.053 | 0.005  | 0.015 | 0.002  | 0.018 | -0.004 | 0.016 | -0.059 | 0.028 | -0.099 | 0.064 | -0.001 | 0.008 |
| retinol | rs3890033   | TNK2         | C | 12 | 0.144  | 0.042 | 0.084  | 0.050 | 0.005  | 0.010 | -0.001 | 0.010 | 0.007  | 0.009 | 0.016  | 0.016 | 0.053  | 0.053 | 0.005  | 0.005 |
| retinol | rs3898702   | LOC101927394 | T | 16 | -0.217 | 0.054 | -0.064 | 0.034 | 0.011  | 0.010 | 0.015  | 0.012 | -0.010 | 0.011 | 0.036  | 0.020 | -0.046 | 0.043 | -0.004 | 0.005 |
| retinol | rs4135385   | CTNNB1       | G | 19 | 0.212  | 0.049 | -0.037 | 0.036 | -0.007 | 0.010 | -0.013 | 0.012 | -0.005 | 0.011 | -0.022 | 0.018 | -0.018 | 0.040 | -0.005 | 0.005 |
| retinol | rs568632536 | -            | T | 14 | 0.531  | 0.140 | -      | -     | -      | -     | -      | -     | -      | -     | -      | -     | -      | -     | -      | -     |
| retinol | rs58411567  | DNAH10       | A | 16 | -0.208 | 0.052 | 0.073  | 0.032 | 0.021  | 0.009 | 0.014  | 0.011 | 0.023  | 0.010 | 0.018  | 0.017 | 0.058  | 0.040 | 0.019  | 0.005 |
| retinol | rs6550239   | RAB5A        | A | 15 | -0.183 | 0.048 | 0.008  | 0.034 | 0.002  | 0.009 | 0.017  | 0.011 | 0.033  | 0.010 | -0.004 | 0.018 | 0.045  | 0.039 | 0.002  | 0.005 |
| retinol | rs75308833  | -            | T | 11 | -0.494 | 0.147 | -      | -     | -0.005 | 0.025 | 0.026  | 0.030 | -0.019 | 0.027 | 0.039  | 0.046 | -0.167 | 0.113 | -0.022 | 0.014 |
| retinol | rs7926028   | -            | T | 10 | -0.135 | 0.042 | -0.126 | 0.033 | -0.008 | 0.009 | 0.005  | 0.010 | -0.023 | 0.009 | 0.010  | 0.015 | -0.009 | 0.034 | -0.006 | 0.004 |
| retinol | rs945817    | LOC105377858 | A | 25 | -0.275 | 0.055 | -0.025 | 0.034 | 0.012  | 0.010 | -0.005 | 0.012 | 0.018  | 0.011 | -0.035 | 0.019 | 0.017  | 0.043 | 0.003  | 0.005 |
| retinol | rs9586119   | -            | C | 18 | 0.355  | 0.083 | 0.006  | 0.057 | 0.002  | 0.015 | 0.012  | 0.017 | 0.028  | 0.016 | 0.021  | 0.027 | 0.021  | 0.063 | 0.001  | 0.008 |

#### UK Biobank

|                      |            |                   |   |    |        |       |        |       |        |       |        |       |        |       |        |       |        |       |   |   |
|----------------------|------------|-------------------|---|----|--------|-------|--------|-------|--------|-------|--------|-------|--------|-------|--------|-------|--------|-------|---|---|
| $\alpha$ -tocopherol | rs10163969 | -                 | T | 19 | -0.035 | 0.008 | -0.045 | 0.039 | -0.357 | 0.169 | 0.125  | 0.105 | 0.001  | 0.139 | 0.116  | 0.268 | -0.056 | 0.265 | - | - |
| $\alpha$ -tocopherol | rs10245705 | LOC105375199      | T | 27 | -0.066 | 0.013 | 0.050  | 0.054 | -0.104 | 0.238 | -0.124 | 0.149 | -0.035 | 0.199 | 0.180  | 0.380 | 0.087  | 0.376 | - | - |
| $\alpha$ -tocopherol | rs10935814 | -                 | A | 20 | -0.037 | 0.008 | -0.001 | 0.023 | -0.008 | 0.100 | 0.034  | 0.062 | -0.051 | 0.082 | -0.127 | 0.158 | -0.245 | 0.156 | - | - |
| $\alpha$ -tocopherol | rs11145330 | -                 | C | 23 | -0.032 | 0.007 | 0.031  | 0.023 | -0.010 | 0.102 | -0.100 | 0.064 | 0.007  | 0.085 | -0.013 | 0.163 | -0.279 | 0.161 | - | - |
| $\alpha$ -tocopherol | rs11992435 | -                 | G | 21 | -0.033 | 0.007 | -0.028 | 0.032 | 0.092  | 0.141 | -0.051 | 0.087 | -0.044 | 0.115 | 0.060  | 0.223 | -0.033 | 0.221 | - | - |
| $\alpha$ -tocopherol | rs1404410  | -                 | G | 21 | 0.024  | 0.005 | 0.012  | 0.019 | 0.046  | 0.081 | 0.064  | 0.051 | 0.045  | 0.068 | 0.154  | 0.130 | -0.031 | 0.128 | - | - |
| $\alpha$ -tocopherol | rs1532701  | SLC6A2            | A | 21 | 0.014  | 0.003 | -0.001 | 0.015 | -0.114 | 0.065 | 0.049  | 0.041 | -0.020 | 0.054 | -0.041 | 0.104 | -0.182 | 0.102 | - | - |
| $\alpha$ -tocopherol | rs2074731  | SF3A1             | A | 22 | -0.018 | 0.004 | 0.026  | 0.020 | 0.229  | 0.088 | 0.087  | 0.055 | -0.009 | 0.073 | 0.131  | 0.140 | -0.116 | 0.139 | - | - |
| $\alpha$ -tocopherol | rs261342   | LIPC/LIPC-<br>AS1 | C | 21 | -0.017 | 0.004 | 0.002  | 0.018 | 0.051  | 0.079 | -0.070 | 0.049 | 0.074  | 0.065 | 0.098  | 0.125 | 0.072  | 0.124 | - | - |
| $\alpha$ -tocopherol | rs7238006  | -                 | C | 24 | -0.028 | 0.006 | 0.047  | 0.029 | -0.174 | 0.128 | 0.025  | 0.080 | 0.135  | 0.106 | 0.140  | 0.204 | 0.025  | 0.202 | - | - |
| $\alpha$ -tocopherol | rs7930821  | ZDHHC13           | T | 20 | 0.067  | 0.015 | -0.018 | 0.053 | 0.363  | 0.232 | -0.059 | 0.145 | -0.307 | 0.194 | -0.602 | 0.372 | 0.186  | 0.366 | - | - |
| $\gamma$ -tocopherol | rs10077932 | -                 | T | 21 | -0.040 | 0.009 | -0.026 | 0.019 | 0.031  | 0.084 | -0.011 | 0.052 | -0.061 | 0.069 | -0.050 | 0.134 | -0.015 | 0.132 | - | - |
| $\gamma$ -tocopherol | rs1013104  | -                 | T | 21 | -0.021 | 0.005 | -0.012 | 0.015 | 0.119  | 0.065 | -0.069 | 0.041 | -0.096 | 0.054 | -0.229 | 0.104 | -0.019 | 0.103 | - | - |
| $\gamma$ -tocopherol | rs10466757 | BCAT1             | T | 20 | -0.063 | 0.014 | 0.003  | 0.017 | -0.041 | 0.075 | -0.058 | 0.046 | 0.046  | 0.062 | -0.174 | 0.119 | 0.131  | 0.117 | - | - |

|              |             |              |   |    |        |       |        |       |        |       |        |       |        |       |        |       |        |       |   |   |
|--------------|-------------|--------------|---|----|--------|-------|--------|-------|--------|-------|--------|-------|--------|-------|--------|-------|--------|-------|---|---|
| γ-tocopherol | rs10492212  | -            | T | 20 | -0.027 | 0.006 | -0.012 | 0.020 | 0.058  | 0.089 | 0.057  | 0.055 | 0.019  | 0.074 | -0.062 | 0.142 | 0.064  | 0.139 | - | - |
| γ-tocopherol | rs10520845  | MYO10        | A | 21 | 0.191  | 0.042 | -0.193 | 0.069 | -0.198 | 0.301 | -0.009 | 0.188 | -0.200 | 0.251 | 0.618  | 0.482 | -0.327 | 0.478 | - | - |
| γ-tocopherol | rs1060467   | CYP4F11      | G | 27 | -0.023 | 0.005 | -0.022 | 0.015 | 0.147  | 0.066 | 0.028  | 0.041 | 0.031  | 0.054 | -0.099 | 0.105 | -0.009 | 0.103 | - | - |
| γ-tocopherol | rs13336771  | LONP2        | A | 20 | 0.062  | 0.014 | 0.010  | 0.021 | -0.157 | 0.091 | 0.071  | 0.056 | 0.009  | 0.075 | 0.148  | 0.145 | 0.106  | 0.143 | - | - |
| γ-tocopherol | rs261301    | -            | C | 23 | -0.032 | 0.007 | 0.016  | 0.021 | 0.012  | 0.093 | -0.004 | 0.058 | 0.041  | 0.077 | 0.094  | 0.149 | -0.028 | 0.147 | - | - |
| γ-tocopherol | rs2794327   | MEGF6        | T | 20 | -0.036 | 0.008 | 0.007  | 0.016 | 0.083  | 0.070 | 0.014  | 0.044 | -0.101 | 0.058 | 0.038  | 0.112 | 0.110  | 0.110 | - | - |
| γ-tocopherol | rs5994305   | SEC14L2      | G | 25 | -0.031 | 0.006 | 0.018  | 0.020 | 0.209  | 0.087 | 0.087  | 0.054 | 0.012  | 0.072 | 0.069  | 0.138 | -0.174 | 0.137 | - | - |
| γ-tocopherol | rs6821770   | SORCS2       | A | 20 | 0.038  | 0.009 | 0.044  | 0.019 | 0.090  | 0.085 | -0.143 | 0.053 | -0.148 | 0.070 | 0.037  | 0.135 | 0.008  | 0.134 | - | - |
| γ-tocopherol | rs7038957   | -            | C | 21 | 0.029  | 0.006 | 0.002  | 0.020 | -0.078 | 0.087 | 0.002  | 0.054 | -0.021 | 0.072 | 0.084  | 0.138 | 0.188  | 0.136 | - | - |
| γ-tocopherol | rs7350776   | RYR3         | G | 21 | -0.024 | 0.005 | -0.004 | 0.016 | -0.046 | 0.071 | 0.062  | 0.044 | -0.032 | 0.058 | 0.082  | 0.113 | -0.011 | 0.111 | - | - |
| ascorbate    | rs11167905  | -            | C | 24 | -0.080 | 0.016 | 0.039  | 0.020 | 0.008  | 0.090 | 0.039  | 0.056 | -0.042 | 0.074 | -0.036 | 0.143 | -0.103 | 0.141 | - | - |
| ascorbate    | rs13069990  | LSAMP        | T | 21 | -0.051 | 0.011 | -0.016 | 0.015 | 0.095  | 0.066 | 0.005  | 0.041 | -0.088 | 0.055 | -0.005 | 0.106 | 0.091  | 0.105 | - | - |
| ascorbate    | rs13103690  | SLC2A9       | G | 21 | 0.047  | 0.010 | -0.015 | 0.015 | 0.010  | 0.065 | 0.026  | 0.041 | 0.022  | 0.054 | 0.079  | 0.104 | 0.181  | 0.102 | - | - |
| ascorbate    | rs2070006   | FGA          | C | 21 | -0.051 | 0.011 | 0.005  | 0.015 | 0.207  | 0.067 | 0.019  | 0.042 | 0.008  | 0.055 | -0.110 | 0.107 | 0.065  | 0.105 | - | - |
| ascorbate    | rs577596    | -            | A | 25 | -0.057 | 0.011 | -0.013 | 0.015 | -0.019 | 0.068 | -0.012 | 0.042 | 0.128  | 0.056 | 0.041  | 0.108 | -0.154 | 0.107 | - | - |
| ascorbate    | rs6713914   | LOC105374754 | C | 26 | -0.059 | 0.012 | -0.021 | 0.015 | -0.087 | 0.065 | 0.067  | 0.040 | 0.066  | 0.054 | 0.118  | 0.104 | 0.071  | 0.102 | - | - |
| ascorbate    | rs6826474   | -            | T | 23 | -0.138 | 0.029 | 0.027  | 0.046 | 0.003  | 0.201 | -0.040 | 0.126 | -0.130 | 0.168 | 0.843  | 0.325 | 0.606  | 0.320 | - | - |
| ascorbate    | rs6834631   | LOC107986309 | G | 24 | -0.131 | 0.027 | -0.022 | 0.036 | -0.038 | 0.157 | -0.011 | 0.098 | -0.031 | 0.130 | -0.337 | 0.250 | 0.294  | 0.247 | - | - |
| ascorbate    | rs7112460   | HYLS1        | T | 24 | 0.108  | 0.022 | -0.029 | 0.030 | -0.061 | 0.133 | 0.102  | 0.083 | -0.003 | 0.110 | 0.332  | 0.212 | -0.051 | 0.209 | - | - |
| ascorbate    | rs8057559   | ZFHX3        | T | 20 | 0.140  | 0.031 | 0.026  | 0.045 | 0.206  | 0.198 | 0.029  | 0.123 | 0.145  | 0.163 | -0.044 | 0.314 | -0.071 | 0.310 | - | - |
| ascorbate    | rs808686    | -            | A | 22 | 0.060  | 0.013 | -0.002 | 0.015 | -0.108 | 0.065 | -0.013 | 0.040 | -0.018 | 0.054 | -0.015 | 0.103 | -0.067 | 0.102 | - | - |
| ascorbate    | rs8105491   | -            | T | 22 | -0.070 | 0.015 | -0.016 | 0.021 | 0.057  | 0.090 | 0.030  | 0.056 | 0.071  | 0.075 | -0.152 | 0.144 | -0.110 | 0.142 | - | - |
| ascorbate    | rs9419004   | ADGRA1       | C | 20 | -0.254 | 0.056 | -0.013 | 0.017 | 0.164  | 0.073 | 0.018  | 0.045 | 0.057  | 0.060 | 0.115  | 0.116 | -0.253 | 0.114 | - | - |
| ascorbate    | rs9606290   | LOC105372863 | A | 20 | 0.159  | 0.035 | 0.000  | 0.017 | 0.036  | 0.075 | -0.053 | 0.047 | -0.060 | 0.062 | -0.066 | 0.119 | 0.022  | 0.118 | - | - |
| retinol      | rs10019071  | -            | A | 17 | 0.657  | 0.161 | 0.013  | 0.054 | -0.011 | 0.237 | 0.010  | 0.147 | 0.113  | 0.195 | -0.018 | 0.377 | 0.251  | 0.376 | - | - |
| retinol      | rs112293959 | ZFAND6       | G | 11 | -0.429 | 0.130 | 0.033  | 0.041 | -0.279 | 0.181 | -0.202 | 0.114 | -0.097 | 0.151 | -0.100 | 0.291 | 0.037  | 0.287 | - | - |
| retinol      | rs114515641 | IGSF11       | G | 10 | 0.414  | 0.129 | -0.011 | 0.043 | -0.155 | 0.188 | 0.149  | 0.117 | 0.150  | 0.156 | 0.011  | 0.299 | -0.006 | 0.295 | - | - |
| retinol      | rs1153379   | -            | A | 15 | -0.323 | 0.083 | 0.024  | 0.031 | -0.201 | 0.135 | 0.024  | 0.084 | 0.084  | 0.112 | -0.081 | 0.215 | 0.305  | 0.212 | - | - |
| retinol      | rs117468033 |              | T | 26 | -0.961 | 0.188 | -      | -     | -      | -     | -      | -     | -      | -     | -      | -     | -      | -     | - | - |

|                      |             |              |   |    |        |       |        |       |        |       |        |       |        |       |        |       |        |       |        |       |
|----------------------|-------------|--------------|---|----|--------|-------|--------|-------|--------|-------|--------|-------|--------|-------|--------|-------|--------|-------|--------|-------|
| retinol              | rs1176744   | HTR3B        | C | 21 | -0.207 | 0.045 | 0.017  | 0.016 | 0.180  | 0.070 | -0.026 | 0.043 | -0.038 | 0.058 | 0.204  | 0.111 | -0.159 | 0.110 | -      | -     |
| retinol              | rs118025446 | CEP162       | A | 17 | -0.481 | 0.115 | -0.006 | 0.038 | 0.004  | 0.166 | 0.024  | 0.103 | 0.092  | 0.136 | -0.414 | 0.263 | -0.096 | 0.260 | -      | -     |
| retinol              | rs12955464  | -            | G | 15 | -0.234 | 0.061 | 0.020  | 0.021 | 0.052  | 0.092 | -0.003 | 0.057 | -0.011 | 0.076 | 0.159  | 0.147 | -0.259 | 0.144 | -      | -     |
| retinol              | rs139726207 | -            | G | 11 | 0.370  | 0.110 | 0.038  | 0.031 | 0.206  | 0.134 | 0.054  | 0.084 | -0.145 | 0.111 | 0.168  | 0.214 | -0.009 | 0.211 | -      | -     |
| retinol              | rs149113848 | -            | G | 13 | -0.964 | 0.265 | 0.031  | 0.086 | 0.670  | 0.383 | -0.129 | 0.238 | -0.191 | 0.313 | 0.779  | 0.609 | -0.312 | 0.599 | -      | -     |
| retinol              | rs149478645 | CTTNBP2      | G | 13 | -0.507 | 0.142 | -0.021 | 0.050 | 0.223  | 0.221 | 0.073  | 0.137 | -0.208 | 0.182 | 0.087  | 0.351 | -0.056 | 0.346 | -      | -     |
| retinol              | rs17005512  | -            | C | 13 | -0.218 | 0.060 | -0.032 | 0.020 | -0.008 | 0.090 | 0.044  | 0.056 | -0.052 | 0.074 | 0.311  | 0.143 | 0.242  | 0.141 | -      | -     |
| retinol              | rs1842947   | OR3A3        | G | 20 | -0.192 | 0.043 | 0.011  | 0.015 | 0.141  | 0.065 | 0.022  | 0.041 | 0.034  | 0.054 | 0.082  | 0.104 | 0.099  | 0.103 | -      | -     |
| retinol              | rs2147337   | SIRPG        | G | 13 | 0.158  | 0.044 | 0.026  | 0.015 | -0.134 | 0.068 | 0.001  | 0.042 | 0.045  | 0.056 | 0.062  | 0.108 | 0.121  | 0.106 | -      | -     |
| retinol              | rs2367816   | LOC105374455 | G | 20 | 0.228  | 0.051 | 0.003  | 0.017 | -0.042 | 0.076 | 0.071  | 0.047 | -0.051 | 0.063 | -0.032 | 0.121 | -0.121 | 0.120 | -      | -     |
| retinol              | rs2417325   | -            | T | 15 | 0.329  | 0.084 | -0.044 | 0.029 | -0.111 | 0.126 | 0.167  | 0.079 | 0.117  | 0.104 | 0.201  | 0.201 | 0.026  | 0.198 | -      | -     |
| retinol              | rs3890033   | TNK2         | C | 12 | 0.144  | 0.042 | -0.004 | 0.015 | -0.056 | 0.066 | -0.065 | 0.041 | 0.031  | 0.054 | 0.048  | 0.105 | 0.011  | 0.103 | -      | -     |
| retinol              | rs3898702   | LOC101927394 | T | 16 | -0.217 | 0.054 | 0.002  | 0.018 | -0.065 | 0.081 | -0.015 | 0.050 | 0.027  | 0.067 | -0.029 | 0.129 | 0.164  | 0.127 | -      | -     |
| retinol              | rs4135385   | CTNNB1       | G | 19 | 0.212  | 0.049 | -0.017 | 0.018 | 0.043  | 0.077 | -0.025 | 0.048 | 0.004  | 0.064 | 0.167  | 0.123 | -0.067 | 0.121 | -      | -     |
| retinol              | rs568632536 |              | T | 14 | 0.531  | 0.140 | -      | -     | -      | -     | -      | -     | -      | -     | -      | -     | -      | -     | -      | -     |
| retinol              | rs58411567  | DNAH10       | A | 16 | -0.208 | 0.052 | 0.017  | 0.018 | -0.122 | 0.077 | -0.001 | 0.048 | 0.214  | 0.064 | 0.063  | 0.123 | 0.110  | 0.122 | -      | -     |
| retinol              | rs6550239   | RAB5A        | A | 15 | -0.183 | 0.048 | -0.021 | 0.018 | 0.024  | 0.078 | 0.034  | 0.048 | 0.063  | 0.064 | 0.029  | 0.124 | 0.244  | 0.122 | -      | -     |
| retinol              | rs75308833  | -            | T | 11 | -0.494 | 0.147 | 0.031  | 0.046 | 0.498  | 0.204 | 0.032  | 0.127 | 0.235  | 0.167 | 0.313  | 0.323 | 0.095  | 0.321 | -      | -     |
| retinol              | rs7926028   | -            | T | 10 | -0.135 | 0.042 | -0.030 | 0.015 | -0.009 | 0.065 | 0.019  | 0.040 | 0.039  | 0.054 | 0.010  | 0.103 | 0.028  | 0.102 | -      | -     |
| retinol              | rs945817    | LOC105377858 | A | 25 | -0.275 | 0.055 | 0.025  | 0.019 | 0.032  | 0.082 | -0.063 | 0.051 | -0.055 | 0.068 | 0.093  | 0.131 | -0.232 | 0.129 | -      | -     |
| retinol              | rs9586119   | -            | C | 18 | 0.355  | 0.083 | 0.029  | 0.026 | 0.204  | 0.115 | -0.024 | 0.072 | 0.041  | 0.095 | -0.045 | 0.184 | -0.011 | 0.181 | -      | -     |
| <b>FinnGen study</b> |             |              |   |    |        |       |        |       |        |       |        |       |        |       |        |       |        |       |        |       |
| $\alpha$ -tocopherol | rs10163969  | -            | T | 19 | -0.035 | 0.008 | 0.014  | 0.017 | -      | -     | 0.056  | 0.032 | -0.019 | 0.043 | 0.046  | 0.054 | -0.004 | 0.058 | 0.027  | 0.013 |
| $\alpha$ -tocopherol | rs10245705  | LOC105375199 | T | 27 | -0.066 | 0.013 | 0.065  | 0.048 | -      | -     | -0.001 | 0.088 | -0.079 | 0.121 | -0.021 | 0.154 | 0.021  | 0.165 | 0.026  | 0.036 |
| $\alpha$ -tocopherol | rs10935814  | -            | A | 20 | -0.037 | 0.008 | 0.035  | 0.018 | -      | -     | 0.009  | 0.033 | 0.055  | 0.045 | -0.068 | 0.056 | 0.130  | 0.060 | 0.005  | 0.014 |
| $\alpha$ -tocopherol | rs11145330  | -            | C | 23 | -0.032 | 0.007 | 0.016  | 0.016 | -      | -     | -0.001 | 0.029 | 0.042  | 0.039 | -0.013 | 0.050 | -0.030 | 0.053 | 0.006  | 0.012 |
| $\alpha$ -tocopherol | rs11992435  | -            | G | 21 | -0.033 | 0.007 | -0.014 | 0.027 | -      | -     | -0.067 | 0.049 | 0.067  | 0.067 | -0.070 | 0.085 | -0.088 | 0.091 | -0.013 | 0.020 |
| $\alpha$ -tocopherol | rs1404410   | -            | G | 21 | 0.024  | 0.005 | -0.007 | 0.014 | -      | -     | 0.036  | 0.026 | -0.043 | 0.035 | -0.021 | 0.044 | -0.007 | 0.047 | 0.002  | 0.011 |
| $\alpha$ -tocopherol | rs1532701   | SLC6A2       | A | 21 | 0.014  | 0.003 | -0.002 | 0.011 | -      | -     | -0.018 | 0.021 | -0.070 | 0.028 | -0.027 | 0.036 | 0.009  | 0.038 | -0.003 | 0.009 |

|                      |            |                   |   |    |        |       |        |       |   |   |        |       |        |       |        |       |        |       |        |       |
|----------------------|------------|-------------------|---|----|--------|-------|--------|-------|---|---|--------|-------|--------|-------|--------|-------|--------|-------|--------|-------|
| $\alpha$ -tocopherol | rs2074731  | SF3A1             | A | 22 | -0.018 | 0.004 | 0.022  | 0.015 | - | - | 0.029  | 0.027 | 0.032  | 0.036 | 0.008  | 0.046 | 0.026  | 0.049 | 0.018  | 0.011 |
| $\alpha$ -tocopherol | rs261342   | LIPC/LIPC-<br>AS1 | C | 21 | -0.017 | 0.004 | -0.038 | 0.013 | - | - | -0.044 | 0.025 | -0.003 | 0.034 | -0.066 | 0.042 | 0.011  | 0.045 | -0.008 | 0.010 |
| $\alpha$ -tocopherol | rs7238006  | -                 | C | 24 | -0.028 | 0.006 | 0.005  | 0.016 | - | - | -0.010 | 0.030 | 0.033  | 0.041 | -0.024 | 0.051 | -0.009 | 0.055 | 0.017  | 0.012 |
| $\alpha$ -tocopherol | rs7930821  | ZDHHC13           | T | 20 | 0.067  | 0.015 | -0.187 | 0.059 | - | - | -0.127 | 0.102 | -0.209 | 0.134 | -0.246 | 0.177 | -0.067 | 0.185 | -0.044 | 0.043 |
| $\gamma$ -tocopherol | rs10077932 | -                 | T | 21 | -0.040 | 0.009 | 0.009  | 0.014 | - | - | 0.023  | 0.026 | -0.058 | 0.036 | -0.004 | 0.045 | -0.025 | 0.048 | -0.005 | 0.011 |
| $\gamma$ -tocopherol | rs1013104  | -                 | T | 21 | -0.021 | 0.005 | -0.008 | 0.011 | - | - | -0.013 | 0.021 | 0.002  | 0.028 | 0.044  | 0.036 | 0.070  | 0.038 | -0.005 | 0.009 |
| $\gamma$ -tocopherol | rs10466757 | BCAT1             | T | 20 | -0.063 | 0.014 | -0.020 | 0.013 | - | - | -0.011 | 0.024 | -0.004 | 0.032 | 0.025  | 0.041 | -0.045 | 0.043 | -0.015 | 0.010 |
| $\gamma$ -tocopherol | rs10492212 | -                 | T | 20 | -0.027 | 0.006 | 0.005  | 0.014 | - | - | -0.014 | 0.026 | 0.005  | 0.036 | -0.026 | 0.045 | 0.010  | 0.048 | -0.013 | 0.011 |
| $\gamma$ -tocopherol | rs10520845 | MYO10             | A | 21 | 0.191  | 0.042 | -0.025 | 0.043 | - | - | 0.077  | 0.079 | 0.089  | 0.109 | 0.176  | 0.135 | -0.045 | 0.141 | -0.033 | 0.032 |
| $\gamma$ -tocopherol | rs1060467  | CYP4F11           | G | 27 | -0.023 | 0.005 | -0.012 | 0.011 | - | - | -0.006 | 0.021 | 0.037  | 0.029 | 0.003  | 0.036 | 0.036  | 0.038 | -0.016 | 0.009 |
| $\gamma$ -tocopherol | rs13336771 | LONP2             | A | 20 | 0.062  | 0.014 | 0.006  | 0.015 | - | - | 0.022  | 0.027 | 0.004  | 0.038 | -0.022 | 0.047 | 0.043  | 0.050 | -0.001 | 0.011 |
| $\gamma$ -tocopherol | rs261301   | -                 | C | 23 | -0.032 | 0.007 | 0.041  | 0.015 | - | - | 0.034  | 0.028 | -0.004 | 0.038 | -0.100 | 0.047 | 0.049  | 0.050 | 0.010  | 0.011 |
| $\gamma$ -tocopherol | rs2794327  | MEGF6             | T | 20 | -0.036 | 0.008 | 0.022  | 0.012 | - | - | 0.014  | 0.022 | 0.008  | 0.030 | 0.033  | 0.038 | 0.014  | 0.040 | 0.012  | 0.009 |
| $\gamma$ -tocopherol | rs5994305  | SEC14L2           | G | 25 | -0.031 | 0.006 | 0.017  | 0.014 | - | - | 0.020  | 0.026 | 0.028  | 0.036 | 0.005  | 0.045 | 0.029  | 0.048 | 0.016  | 0.011 |
| $\gamma$ -tocopherol | rs6821770  | SORCS2            | A | 20 | 0.038  | 0.009 | 0.008  | 0.013 | - | - | 0.032  | 0.025 | 0.000  | 0.033 | 0.016  | 0.042 | 0.005  | 0.045 | -0.010 | 0.010 |
| $\gamma$ -tocopherol | rs7038957  | -                 | C | 21 | 0.029  | 0.006 | 0.000  | 0.015 | - | - | 0.036  | 0.028 | -0.032 | 0.039 | -0.031 | 0.049 | 0.047  | 0.052 | 0.006  | 0.012 |
| $\gamma$ -tocopherol | rs7350776  | RYR3              | G | 21 | -0.024 | 0.005 | -0.003 | 0.012 | - | - | 0.005  | 0.022 | -0.027 | 0.030 | 0.015  | 0.038 | -0.001 | 0.040 | 0.001  | 0.009 |
| ascorbate            | rs11167905 | -                 | C | 24 | -0.080 | 0.016 | 0.003  | 0.017 | - | - | 0.035  | 0.031 | -0.036 | 0.043 | 0.098  | 0.054 | -0.030 | 0.057 | 0.001  | 0.013 |
| ascorbate            | rs13069990 | LSAMP             | T | 21 | -0.051 | 0.011 | -0.003 | 0.012 | - | - | -0.009 | 0.021 | 0.031  | 0.029 | -0.039 | 0.037 | -0.020 | 0.039 | 0.000  | 0.009 |
| ascorbate            | rs13103690 | SLC2A9            | G | 21 | 0.047  | 0.010 | -0.001 | 0.011 | - | - | 0.017  | 0.021 | 0.028  | 0.028 | 0.069  | 0.036 | 0.029  | 0.038 | 0.017  | 0.009 |
| ascorbate            | rs2070006  | FGA               | C | 21 | -0.051 | 0.011 | -0.009 | 0.011 | - | - | 0.010  | 0.021 | -0.023 | 0.028 | 0.003  | 0.035 | 0.042  | 0.038 | -0.001 | 0.008 |
| ascorbate            | rs577596   | -                 | A | 25 | -0.057 | 0.011 | 0.018  | 0.011 | - | - | -0.007 | 0.021 | -0.011 | 0.029 | 0.047  | 0.036 | 0.007  | 0.038 | 0.010  | 0.009 |
| ascorbate            | rs6713914  | LOC105374754      | C | 26 | -0.059 | 0.012 | -0.023 | 0.011 | - | - | 0.002  | 0.021 | -0.021 | 0.029 | 0.000  | 0.036 | 0.032  | 0.038 | -0.012 | 0.009 |
| ascorbate            | rs6826474  | -                 | T | 23 | -0.138 | 0.029 | 0.009  | 0.041 | - | - | 0.006  | 0.076 | -0.175 | 0.105 | 0.143  | 0.131 | 0.173  | 0.141 | 0.006  | 0.031 |
| ascorbate            | rs6834631  | LOC107986309      | G | 24 | -0.131 | 0.027 | -0.024 | 0.040 | - | - | 0.101  | 0.074 | -0.157 | 0.102 | 0.080  | 0.126 | -0.031 | 0.137 | -0.010 | 0.031 |
| ascorbate            | rs7112460  | HYLS1             | T | 24 | 0.108  | 0.022 | -0.054 | 0.026 | - | - | 0.017  | 0.049 | 0.037  | 0.067 | -0.040 | 0.084 | 0.048  | 0.089 | 0.007  | 0.020 |
| ascorbate            | rs8057559  | ZFHX3             | T | 20 | 0.140  | 0.031 | -0.021 | 0.035 | - | - | 0.004  | 0.064 | -0.097 | 0.086 | 0.281  | 0.100 | -0.053 | 0.117 | -0.013 | 0.026 |
| ascorbate            | rs808686   | -                 | A | 22 | 0.060  | 0.013 | 0.011  | 0.012 | - | - | 0.009  | 0.021 | -0.014 | 0.029 | 0.021  | 0.036 | 0.066  | 0.039 | 0.002  | 0.009 |

|           |             |              |   |    |        |       |        |       |   |   |        |       |        |       |        |       |        |       |        |       |
|-----------|-------------|--------------|---|----|--------|-------|--------|-------|---|---|--------|-------|--------|-------|--------|-------|--------|-------|--------|-------|
| ascorbate | rs8105491   | -            | T | 22 | -0.070 | 0.015 | -0.011 | 0.015 | - | - | 0.022  | 0.027 | -0.011 | 0.037 | -0.031 | 0.047 | -0.009 | 0.050 | -0.009 | 0.011 |
| ascorbate | rs9419004   | ADGRA1       | C | 20 | -0.254 | 0.056 | 0.002  | 0.013 | - | - | -0.006 | 0.024 | -0.001 | 0.033 | -0.047 | 0.041 | 0.019  | 0.045 | -0.010 | 0.010 |
| ascorbate | rs9606290   | LOC105372863 | A | 20 | 0.159  | 0.035 | 0.010  | 0.015 | - | - | 0.049  | 0.028 | 0.044  | 0.039 | 0.023  | 0.048 | 0.092  | 0.052 | 0.020  | 0.012 |
| retinol   | rs10019071  | -            | A | 17 | 0.657  | 0.161 | -0.032 | 0.071 | - | - | -0.197 | 0.130 | 0.037  | 0.178 | 0.008  | 0.218 | 0.078  | 0.232 | -0.110 | 0.055 |
| retinol   | rs112293959 | ZFAND6       | G | 11 | -0.429 | 0.130 | -0.047 | 0.039 | - | - | -0.024 | 0.071 | 0.056  | 0.097 | 0.216  | 0.125 | -0.057 | 0.133 | -0.002 | 0.029 |
| retinol   | rs114515641 | IGSF11       | G | 10 | 0.414  | 0.129 | -0.031 | 0.034 | - | - | -0.034 | 0.063 | 0.013  | 0.086 | -0.057 | 0.109 | -0.148 | 0.116 | -0.040 | 0.026 |
| retinol   | rs1153379   | -            | A | 15 | -0.323 | 0.083 | 0.013  | 0.024 | - | - | 0.052  | 0.044 | -0.069 | 0.061 | -0.044 | 0.077 | 0.001  | 0.082 | 0.033  | 0.018 |
| retinol   | rs117468033 |              | T | 26 | -0.961 | 0.188 | 0.013  | 0.048 | - | - | -0.110 | 0.088 | 0.205  | 0.120 | -0.138 | 0.150 | 0.117  | 0.161 | -0.025 | 0.037 |
| retinol   | rs1176744   | HTR3B        | C | 21 | -0.207 | 0.045 | 0.002  | 0.012 | - | - | -0.021 | 0.022 | 0.032  | 0.031 | -0.020 | 0.039 | 0.011  | 0.041 | -0.008 | 0.009 |
| retinol   | rs118025446 | CEP162       | A | 17 | -0.481 | 0.115 | 0.094  | 0.040 | - | - | -0.014 | 0.074 | 0.011  | 0.102 | 0.230  | 0.128 | 0.031  | 0.138 | 0.014  | 0.030 |
| retinol   | rs12955464  | -            | G | 15 | -0.234 | 0.061 | 0.031  | 0.017 | - | - | 0.016  | 0.031 | 0.054  | 0.042 | 0.136  | 0.053 | 0.033  | 0.056 | 0.002  | 0.013 |
| retinol   | rs139726207 | -            | G | 11 | 0.370  | 0.110 | 0.021  | 0.021 | - | - | -0.017 | 0.039 | -0.073 | 0.053 | 0.000  | 0.066 | 0.064  | 0.071 | 0.011  | 0.016 |
| retinol   | rs149113848 | -            | G | 13 | -0.964 | 0.265 | -0.064 | 0.092 | - | - | -0.147 | 0.169 | -0.197 | 0.229 | -0.088 | 0.293 | -0.246 | 0.317 | -0.076 | 0.069 |
| retinol   | rs149478645 | CTTNBP2      | G | 13 | -0.507 | 0.142 | 0.003  | 0.049 | - | - | 0.016  | 0.090 | 0.047  | 0.123 | -0.015 | 0.153 | 0.099  | 0.164 | 0.052  | 0.037 |
| retinol   | rs17005512  | -            | C | 13 | -0.218 | 0.060 | -0.008 | 0.015 | - | - | 0.003  | 0.027 | -0.057 | 0.037 | 0.037  | 0.046 | -0.016 | 0.049 | 0.003  | 0.011 |
| retinol   | rs1842947   | OR3A3        | G | 20 | -0.192 | 0.043 | -0.004 | 0.011 | - | - | -0.005 | 0.021 | -0.023 | 0.028 | 0.028  | 0.036 | -0.045 | 0.038 | 0.013  | 0.009 |
| retinol   | rs2147337   | SIRPG        | G | 13 | 0.158  | 0.044 | 0.008  | 0.012 | - | - | 0.009  | 0.023 | 0.021  | 0.031 | 0.043  | 0.039 | -0.116 | 0.040 | 0.012  | 0.009 |
| retinol   | rs2367816   | LOC105374455 | G | 20 | 0.228  | 0.051 | -0.022 | 0.013 | - | - | -0.029 | 0.024 | 0.006  | 0.033 | -0.044 | 0.042 | -0.105 | 0.045 | -0.008 | 0.010 |
| retinol   | rs2417325   | -            | T | 15 | 0.329  | 0.084 | 0.013  | 0.019 | - | - | 0.001  | 0.035 | 0.025  | 0.048 | -0.051 | 0.060 | 0.056  | 0.064 | 0.014  | 0.014 |
| retinol   | rs3890033   | TNK2         | C | 12 | 0.144  | 0.042 | 0.013  | 0.011 | - | - | -0.021 | 0.021 | -0.017 | 0.028 | -0.011 | 0.036 | -0.027 | 0.038 | 0.005  | 0.009 |
| retinol   | rs3898702   | LOC101927394 | T | 16 | -0.217 | 0.054 | 0.028  | 0.013 | - | - | 0.046  | 0.025 | -0.014 | 0.033 | -0.053 | 0.042 | 0.082  | 0.045 | 0.025  | 0.010 |
| retinol   | rs4135385   | CTNNB1       | G | 19 | 0.212  | 0.049 | -0.005 | 0.014 | - | - | -0.020 | 0.025 | -0.001 | 0.035 | -0.031 | 0.044 | 0.001  | 0.047 | -0.015 | 0.010 |
| retinol   | rs568632536 |              | T | 14 | 0.531  | 0.140 | -      | -     | - | - | -      | -     | -      | -     | -      | -     | -      | -     | -      | -     |
| retinol   | rs58411567  | DNAH10       | A | 16 | -0.208 | 0.052 | 0.032  | 0.013 | - | - | 0.027  | 0.024 | 0.019  | 0.033 | -0.009 | 0.042 | 0.031  | 0.045 | 0.023  | 0.010 |
| retinol   | rs6550239   | RAB5A        | A | 15 | -0.183 | 0.048 | 0.042  | 0.013 | - | - | 0.015  | 0.023 | 0.055  | 0.032 | -0.055 | 0.040 | 0.074  | 0.043 | 0.021  | 0.010 |
| retinol   | rs75308833  | -            | T | 11 | -0.494 | 0.147 | -0.019 | 0.047 | - | - | 0.009  | 0.087 | 0.038  | 0.120 | -0.186 | 0.150 | 0.118  | 0.158 | -0.014 | 0.035 |
| retinol   | rs7926028   | -            | T | 10 | -0.135 | 0.042 | 0.001  | 0.011 | - | - | 0.027  | 0.021 | 0.013  | 0.028 | -0.002 | 0.035 | -0.023 | 0.038 | 0.016  | 0.008 |
| retinol   | rs945817    | LOC105377858 | A | 25 | -0.275 | 0.055 | -0.006 | 0.018 | - | - | 0.067  | 0.033 | -0.041 | 0.045 | 0.001  | 0.057 | -0.041 | 0.060 | 0.000  | 0.013 |
| retinol   | rs9586119   | -            | C | 18 | 0.355  | 0.083 | -0.011 | 0.018 | - | - | -0.050 | 0.032 | 0.008  | 0.044 | -0.057 | 0.055 | -0.032 | 0.059 | -0.020 | 0.013 |

**Table S6. The MR analysis results of the causal effects of absolute ascorbate levels on major mental disorders.**

| Outcome          | $P_h$  | $P_p$ | MR method              | No. SNPs | OR (95% CI)         | $P$ -value |
|------------------|--------|-------|------------------------|----------|---------------------|------------|
| Primary outcome  |        |       |                        |          |                     |            |
| AD               |        |       |                        |          |                     |            |
| ANGST Consortium | 0.827  | 0.854 | Fixed-effect IVW       | 10       | 0.805 (0.574-1.128) | 0.208      |
|                  |        |       | Random effect IVW      | 10       | 0.805 (0.625-1.038) | 0.094      |
|                  |        |       | Maximum likelihood     | 10       | 0.807 (0.575-1.132) | 0.214      |
|                  |        |       | MR Egger               | 10       | 0.843 (0.471-1.509) | 0.581      |
|                  |        |       | Weighted median        | 10       | 0.781 (0.51-1.196)  | 0.255      |
|                  |        |       | MR-PRESSO <sup>†</sup> |          | NA                  | NA         |
| UK Biobank       | 0.929  | 0.894 | Fixed-effect IVW       | 10       | 0.931 (0.801-1.082) | 0.351      |
|                  |        |       | Random effect IVW      | 10       | 0.931 (0.845-1.026) | 0.147      |
|                  |        |       | Maximum likelihood     | 10       | 0.931 (0.8-1.082)   | 0.350      |
|                  |        |       | MR Egger               | 10       | 0.919 (0.726-1.163) | 0.502      |
|                  |        |       | Weighted median        | 10       | 0.909 (0.754-1.096) | 0.316      |
|                  |        |       | MR-PRESSO <sup>†</sup> |          | NA                  | NA         |
| FinnGen          | 0.431  | 0.468 | Fixed-effect IVW       | 10       | 1.093 (0.964-1.238) | 0.165      |
|                  |        |       | Random effect IVW      | 10       | 1.093 (0.964-1.239) | 0.167      |
|                  |        |       | Maximum likelihood     | 10       | 1.094 (0.965-1.241) | 0.161      |
|                  |        |       | MR Egger               | 10       | 1.019 (0.817-1.271) | 0.872      |
|                  |        |       | Weighted median        | 10       | 1.056 (0.899-1.241) | 0.507      |
|                  |        |       | MR-PRESSO <sup>†</sup> |          | NA                  | NA         |
| MDD              |        |       |                        |          |                     |            |
| PGC              | 0.071  | 0.059 | Fixed-effect IVW       | 10       | 1.018 (0.936-1.107) | 0.676      |
|                  |        |       | Random effect IVW      | 10       | 1.018 (0.911-1.137) | 0.752      |
|                  |        |       | Maximum likelihood     | 10       | 1.019 (0.936-1.108) | 0.665      |
|                  |        |       | MR Egger               | 10       | 0.899 (0.779-1.039) | 0.187      |
|                  |        |       | Weighted median        | 10       | 0.962 (0.866-1.068) | 0.464      |
|                  |        |       | MR-PRESSO <sup>†</sup> |          | NA                  | NA         |
| UK Biobank       | 0.040  | 0.477 | Fixed-effect IVW       | 10       | 2.263 (1.167-4.39)  | 0.016      |
|                  |        |       | Random effect IVW      | 10       | 2.263 (0.896-5.717) | 0.084      |
|                  |        |       | Maximum likelihood     | 10       | 2.341 (1.196-4.579) | 0.013      |
|                  |        |       | MR Egger               | 10       | 1.467 (0.333-6.467) | 0.626      |
|                  |        |       | Weighted median        | 10       | 2.038 (0.856-4.852) | 0.107      |
|                  |        |       | MR-PRESSO <sup>†</sup> |          | NA                  | NA         |
| BIP              |        |       |                        |          |                     |            |
| PGC              | <0.001 | 0.087 | Fixed-effect IVW       | 10       | 1.093 (0.991-1.206) | 0.076      |
|                  |        |       | Random effect IVW      | 10       | 1.093 (0.862-1.386) | 0.462      |
|                  |        |       | Maximum likelihood     | 10       | 1.1 (0.993-1.218)   | 0.067      |
|                  |        |       | MR Egger               | 10       | 0.848 (0.611-1.179) | 0.356      |
|                  |        |       | Weighted median        | 10       | 0.998 (0.88-1.132)  | 0.975      |
|                  |        |       | MR-PRESSO              | 9        | 1.025 (0.927-1.133) | 0.633      |
| UK Biobank       | 0.400  | 0.158 | Fixed-effect IVW       | 10       | 0.872 (0.577-1.318) | 0.515      |
|                  |        |       | Random effect IVW      | 10       | 0.872 (0.572-1.33)  | 0.525      |
|                  |        |       | Maximum likelihood     | 10       | 0.871 (0.575-1.319) | 0.514      |
|                  |        |       | MR Egger               | 10       | 0.588 (0.309-1.121) | 0.145      |

|             |        |       |                          |           |                            |              |
|-------------|--------|-------|--------------------------|-----------|----------------------------|--------------|
| FinnGen     | <0.001 | 0.111 | Weighted median          | 10        | 0.679 (0.402-1.146)        | 0.147        |
|             |        |       | MR-PRESSO                |           | NA                         | NA           |
|             |        |       | Fixed-effect IVW         | 10        | 1.069 (0.85-1.343)         | 0.568        |
|             |        |       | <b>Random effect IVW</b> | <b>10</b> | <b>1.069 (0.701-1.629)</b> | <b>0.757</b> |
|             |        |       | Maximum likelihood       | 10        | 1.073 (0.85-1.355)         | 0.554        |
|             |        |       | MR Egger                 | 10        | 0.661 (0.346-1.262)        | 0.245        |
|             |        |       | Weighted median          | 10        | 0.703 (0.493-1.004)        | 0.053        |
| <b>SCZ</b>  |        |       | MR-PRESSO                | 9         | 0.962 (0.762-1.215)        | 0.747        |
|             |        |       |                          |           |                            |              |
|             |        |       |                          |           |                            |              |
|             |        |       |                          |           |                            |              |
|             |        |       |                          |           |                            |              |
|             |        |       |                          |           |                            |              |
|             |        |       |                          |           |                            |              |
| PGC         | 0.003  | 0.502 | Fixed-effect IVW         | 10        | 0.925 (0.844-1.014)        | 0.098        |
|             |        |       | <b>Random effect IVW</b> | <b>10</b> | <b>0.925 (0.793-1.079)</b> | <b>0.323</b> |
|             |        |       | Maximum likelihood       | 10        | 0.923 (0.841-1.014)        | 0.094        |
|             |        |       | MR Egger                 | 10        | 0.862 (0.669-1.111)        | 0.284        |
|             |        |       | Weighted median          | 10        | 0.909 (0.807-1.023)        | 0.113        |
|             |        |       | MR-PRESSO                | 9         | 0.901 (0.788-1.03)         | 0.127        |
|             |        |       |                          |           |                            |              |
| UK Biobank  | 0.034  | 0.585 | Fixed-effect IVW         | 10        | 1.138 (0.658-1.969)        | 0.645        |
|             |        |       | <b>Random effect IVW</b> | <b>10</b> | <b>1.138 (0.522-2.478)</b> | <b>0.745</b> |
|             |        |       | Maximum likelihood       | 10        | 1.14 (0.655-1.984)         | 0.643        |
|             |        |       | MR Egger                 | 10        | 0.858 (0.243-3.039)        | 0.819        |
|             |        |       | Weighted median          | 10        | 0.908 (0.449-1.837)        | 0.788        |
|             |        |       | MR-PRESSO <sup>†</sup>   |           | NA                         | NA           |
|             |        |       |                          |           |                            |              |
| FinnGen     | 0.726  | 0.804 | <b>Fixed-effect IVW</b>  | <b>10</b> | <b>0.898 (0.655-1.23)</b>  | <b>0.503</b> |
|             |        |       | Random effect IVW        | 10        | 0.898 (0.692-1.165)        | 0.417        |
|             |        |       | Maximum likelihood       | 10        | 0.897 (0.654-1.231)        | 0.502        |
|             |        |       | MR Egger                 | 10        | 0.847 (0.491-1.461)        | 0.567        |
|             |        |       | Weighted median          | 10        | 0.861 (0.561-1.32)         | 0.492        |
|             |        |       | MR-PRESSO <sup>†</sup>   |           | NA                         | NA           |
|             |        |       |                          |           |                            |              |
| <b>PTSD</b> |        |       |                          |           |                            |              |
|             |        |       |                          |           |                            |              |
|             |        |       |                          |           |                            |              |
|             |        |       |                          |           |                            |              |
|             |        |       |                          |           |                            |              |
|             |        |       |                          |           |                            |              |
|             |        |       |                          |           |                            |              |
| PGC         | 0.920  | 0.294 | <b>Fixed-effect IVW</b>  | <b>10</b> | <b>1.031 (0.882-1.205)</b> | <b>0.701</b> |
|             |        |       | Random effect IVW        | 10        | 1.031 (0.931-1.142)        | 0.558        |
|             |        |       | Maximum likelihood       | 10        | 1.031 (0.882-1.206)        | 0.697        |
|             |        |       | MR Egger                 | 10        | 0.925 (0.723-1.182)        | 0.550        |
|             |        |       | Weighted median          | 10        | 0.958 (0.792-1.16)         | 0.661        |
|             |        |       | MR-PRESSO <sup>†</sup>   |           | NA                         | NA           |
|             |        |       |                          |           |                            |              |
| UK Biobank  | 0.776  | 0.638 | <b>Fixed-effect IVW</b>  | <b>10</b> | <b>2.119 (0.736-6.099)</b> | <b>0.164</b> |
|             |        |       | Random effect IVW        | 10        | 2.119 (0.918-4.889)        | 0.078        |
|             |        |       | Maximum likelihood       | 10        | 2.129 (0.736-6.156)        | 0.163        |
|             |        |       | MR Egger                 | 10        | 1.545 (0.296-8.051)        | 0.620        |
|             |        |       | Weighted median          | 10        | 1.641 (0.435-6.194)        | 0.465        |
|             |        |       | MR-PRESSO <sup>†</sup>   |           | NA                         | NA           |
|             |        |       |                          |           |                            |              |
| FinnGen     | 0.117  | 0.261 | <b>Fixed-effect IVW</b>  | <b>10</b> | <b>0.963 (0.65-1.427)</b>  | <b>0.851</b> |
|             |        |       | Random effect IVW        | 10        | 0.963 (0.588-1.577)        | 0.881        |
|             |        |       | Maximum likelihood       | 10        | 0.964 (0.648-1.434)        | 0.858        |
|             |        |       | MR Egger                 | 10        | 1.455 (0.639-3.316)        | 0.398        |
|             |        |       | Weighted median          | 10        | 1.316 (0.718-2.413)        | 0.374        |
|             |        |       | MR-PRESSO <sup>†</sup>   |           | NA                         | NA           |
|             |        |       |                          |           |                            |              |

| OCD               |       |       |                        |    |                      |       |
|-------------------|-------|-------|------------------------|----|----------------------|-------|
| IOCDF-GC & OCGAS  | 0.497 | 0.680 | Fixed-effect IVW       | 10 | 1.131 (0.779-1.641)  | 0.518 |
|                   |       |       | Random effect IVW      | 10 | 1.131 (0.79-1.619)   | 0.503 |
|                   |       |       | Maximum likelihood     | 10 | 1.133 (0.779-1.647)  | 0.514 |
|                   |       |       | MR Egger               | 10 | 1.254 (0.684-2.298)  | 0.485 |
|                   |       |       | Weighted median        | 10 | 1.14 (0.702-1.851)   | 0.597 |
|                   |       |       | MR-PRESSO <sup>†</sup> |    | NA                   | NA    |
| UK Biobank        | 0.395 | 0.310 | Fixed-effect IVW       | 10 | 1.071 (0.378-3.033)  | 0.897 |
|                   |       |       | Random effect IVW      | 10 | 1.071 (0.368-3.115)  | 0.900 |
|                   |       |       | Maximum likelihood     | 10 | 1.073 (0.377-3.057)  | 0.895 |
|                   |       |       | MR Egger               | 10 | 2.159 (0.414-11.245) | 0.387 |
|                   |       |       | Weighted median        | 10 | 1.401 (0.34-5.783)   | 0.641 |
|                   |       |       | MR-PRESSO <sup>†</sup> |    | NA                   | NA    |
| FinnGen           | 0.409 | 0.844 | Fixed-effect IVW       | 10 | 1.256 (0.827-1.909)  | 0.285 |
|                   |       |       | Random effect IVW      | 10 | 1.256 (0.821-1.923)  | 0.293 |
|                   |       |       | Maximum likelihood     | 10 | 1.26 (0.827-1.919)   | 0.282 |
|                   |       |       | MR Egger               | 10 | 1.178 (0.546-2.54)   | 0.687 |
|                   |       |       | Weighted median        | 10 | 1.264 (0.731-2.185)  | 0.402 |
|                   |       |       | MR-PRESSO <sup>†</sup> |    | NA                   | NA    |
| Secondary outcome |       |       |                        |    |                      |       |
| Depression        |       |       |                        |    |                      |       |
| PGC & UK Biobank  | 0.029 | 0.171 | Fixed-effect IVW       | 10 | 1.03 (0.985-1.076)   | 0.196 |
|                   |       |       | Random effect IVW      | 10 | 1.03 (0.966-1.097)   | 0.368 |
|                   |       |       | Maximum likelihood     | 10 | 1.03 (0.985-1.078)   | 0.193 |
|                   |       |       | MR Egger               | 10 | 0.975 (0.888-1.07)   | 0.603 |
|                   |       |       | Weighted median        | 10 | 1.012 (0.957-1.071)  | 0.670 |
|                   |       |       | MR-PRESSO <sup>†</sup> |    | NA                   | NA    |
| FinnGen           | 0.016 | 0.308 | Fixed-effect IVW       | 10 | 1.09 (0.992-1.199)   | 0.073 |
|                   |       |       | Random effect IVW      | 10 | 1.09 (0.946-1.257)   | 0.232 |
|                   |       |       | Maximum likelihood     | 10 | 1.094 (0.994-1.204)  | 0.067 |
|                   |       |       | MR Egger               | 10 | 0.977 (0.767-1.245)  | 0.857 |
|                   |       |       | Weighted median        | 10 | 1.048 (0.923-1.189)  | 0.471 |
|                   |       |       | MR-PRESSO              | 9  | 1.051 (0.955-1.158)  | 0.309 |

The best causal estimation highlighted in bold.

AD, anxiety disorders; MDD, major depressive disorder; BIP, bipolar disorder; SCZ, schizophrenia; PTSD, post-traumatic stress disorder; OCD, obsessive-compulsive disorder; PGC, Psychiatric Genomics Consortium; ANGST, Anxiety NeuroGenetics Study; IOCDF-GC, International Obsessive-Compulsive Disorder Foundation Genetics Collaborative; OCGAS, OCD Collaborative Genetics Association Study.  $P_h$ ,  $P$ -value for heterogeneity;  $P_p$ ,  $P$ -value for pleiotropy; NA, not applicable;

\*: The ORs are scaled per  $\mu\text{mol/L}$  increase in ascorbate.

†: No significant outliers.

**Table S7. The MR analysis results of the causal effects of absolute retinol levels on major mental disorders.**

| Outcome          | $P_h$ | MR method <sup>§</sup> | No. SNPs | OR (95% CI)         | $P$ -value |
|------------------|-------|------------------------|----------|---------------------|------------|
| Primary outcome  |       |                        |          |                     |            |
| AD               |       |                        |          |                     |            |
| ANGST Consortium | 0.305 | Fixed-effect IVW       | 2        | 0.912 (0.799-1.041) | 0.171      |
|                  |       | Random effect IVW      | 2        | 0.912 (0.796-1.044) | 0.182      |
|                  |       | Maximum likelihood     | 2        | 0.911 (0.797-1.042) | 0.174      |
| UK Biobank       | 0.146 | Fixed-effect IVW       | 2        | 0.99 (0.923-1.062)  | 0.777      |
|                  |       | Random effect IVW      | 2        | 0.99 (0.894-1.096)  | 0.845      |
|                  |       | Maximum likelihood     | 2        | 0.99 (0.922-1.062)  | 0.775      |
| FinnGen          | 0.002 | Fixed-effect IVW       | 2        | 0.979 (0.926-1.034) | 0.445      |
|                  |       | Random effect IVW      | 2        | 0.979 (0.827-1.158) | 0.802      |
|                  |       | Maximum likelihood     | 2        | 0.977 (0.922-1.035) | 0.426      |
| MDD              |       |                        |          |                     |            |
| PGC              | 0.101 | Fixed-effect IVW       | 2        | 1.026 (0.988-1.065) | 0.183      |
|                  |       | Random effect IVW      | 2        | 1.026 (0.964-1.091) | 0.417      |
|                  |       | Maximum likelihood     | 2        | 1.027 (0.988-1.067) | 0.182      |
| UK Biobank       | 0.748 | Fixed-effect IVW       | 2        | 0.811 (0.596-1.103) | 0.182      |
|                  |       | Random effect IVW      | 2        | 0.811 (0.735-0.895) | <0.001     |
|                  |       | Maximum likelihood     | 2        | 0.811 (0.595-1.106) | 0.186      |
| BIP              |       |                        |          |                     |            |
| PGC              | 0.387 | Fixed-effect IVW       | 2        | 0.993 (0.949-1.039) | 0.768      |
|                  |       | Random effect IVW      | 2        | 0.993 (0.955-1.033) | 0.733      |
|                  |       | Maximum likelihood     | 2        | 0.993 (0.949-1.039) | 0.767      |
| UK Biobank       | 0.123 | Fixed-effect IVW       | 2        | 0.877 (0.724-1.063) | 0.181      |
|                  |       | Random effect IVW      | 2        | 0.877 (0.653-1.179) | 0.386      |
|                  |       | Maximum likelihood     | 2        | 0.875 (0.72-1.064)  | 0.180      |
| FinnGen          | 0.839 | Fixed-effect IVW       | 2        | 1.035 (0.935-1.145) | 0.511      |
|                  |       | Random effect IVW      | 2        | 1.035 (1.013-1.056) | 0.001      |
|                  |       | Maximum likelihood     | 2        | 1.035 (0.935-1.145) | 0.512      |
| SCZ              |       |                        |          |                     |            |
| PGC              | 0.993 | Fixed-effect IVW       | 2        | 1.039 (0.999-1.081) | 0.054      |
|                  |       | Random effect IVW      | 2        | 1.039 (1.039-1.04)  | <0.001     |
|                  |       | Maximum likelihood     | 2        | 1.039 (0.999-1.081) | 0.058      |
| UK Biobank       | 0.385 | Fixed-effect IVW       | 2        | 0.977 (0.757-1.259) | 0.855      |
|                  |       | Random effect IVW      | 2        | 0.977 (0.783-1.218) | 0.833      |
|                  |       | Maximum likelihood     | 2        | 0.976 (0.756-1.26)  | 0.854      |
| FinnGen          | 0.012 | Fixed-effect IVW       | 2        | 0.969 (0.843-1.114) | 0.657      |
|                  |       | Random effect IVW      | 2        | 0.969 (0.682-1.376) | 0.860      |
|                  |       | Maximum likelihood     | 2        | 0.967 (0.838-1.116) | 0.648      |
| PTSD             |       |                        |          |                     |            |
| PGC              | 0.484 | Fixed-effect IVW       | 2        | 1.054 (0.983-1.13)  | 0.142      |
|                  |       | Random effect IVW      | 2        | 1.054 (1.004-1.107) | 0.036      |
|                  |       | Maximum likelihood     | 2        | 1.054 (0.982-1.132) | 0.145      |
| UK Biobank       | 0.838 | Fixed-effect IVW       | 2        | 1.421 (0.87-2.32)   | 0.160      |
|                  |       | Random effect IVW      | 2        | 1.421 (1.285-1.571) | <0.001     |

|                          |       |                          |          |                            |              |
|--------------------------|-------|--------------------------|----------|----------------------------|--------------|
| FinnGen                  | 0.262 | Maximum likelihood       | 2        | 1.421 (0.866-2.331)        | 0.164        |
|                          |       | <b>Fixed-effect IVW</b>  | <b>2</b> | <b>0.914 (0.767-1.088)</b> | <b>0.312</b> |
|                          |       | Random effect IVW        | 2        | 0.914 (0.751-1.112)        | 0.368        |
|                          |       | Maximum likelihood       | 2        | 0.913 (0.765-1.089)        | 0.311        |
| <b>OCD</b>               |       |                          |          |                            |              |
| IOCDF-GC & OCGAS         | 0.536 | <b>Fixed-effect IVW</b>  | <b>2</b> | <b>1.087 (0.928-1.273)</b> | <b>0.303</b> |
|                          |       | Random effect IVW        | 2        | 1.087 (0.985-1.199)        | 0.096        |
|                          |       | Maximum likelihood       | 2        | 1.087 (0.927-1.275)        | 0.304        |
| UK Biobank               | 0.332 | <b>Fixed-effect IVW</b>  | <b>2</b> | <b>0.888 (0.547-1.44)</b>  | <b>0.629</b> |
|                          |       | Random effect IVW        | 2        | 0.888 (0.555-1.419)        | 0.619        |
|                          |       | Maximum likelihood       | 2        | 0.887 (0.546-1.442)        | 0.628        |
| FinnGen                  | 0.984 | <b>Fixed-effect IVW</b>  | <b>2</b> | <b>0.959 (0.796-1.156)</b> | <b>0.662</b> |
|                          |       | Random effect IVW        | 2        | 0.959 (0.956-0.963)        | <0.001       |
|                          |       | Maximum likelihood       | 2        | 0.959 (0.796-1.156)        | 0.663        |
| <b>Secondary outcome</b> |       |                          |          |                            |              |
| <b>Depression</b>        |       |                          |          |                            |              |
| PGC & UK Biobank         | 0.009 | Fixed-effect IVW         | 2        | 1.008 (0.988-1.029)        | 0.450        |
|                          |       | <b>Random effect IVW</b> | <b>2</b> | <b>1.008 (0.956-1.063)</b> | <b>0.773</b> |
|                          |       | Maximum likelihood       | 2        | 1.008 (0.987-1.03)         | 0.437        |
| FinnGen                  | 0.092 | <b>Fixed-effect IVW</b>  | <b>2</b> | <b>1.038 (0.996-1.083)</b> | <b>0.079</b> |
|                          |       | Random effect IVW        | 2        | 1.038 (0.968-1.114)        | 0.296        |
|                          |       | Maximum likelihood       | 2        | 1.039 (0.995-1.085)        | 0.080        |

The best causal estimation highlighted in bold.

AD, anxiety disorders; MDD, major depressive disorder; BIP, bipolar disorder; SCZ, schizophrenia; PTSD, post-traumatic stress disorder; OCD, obsessive-compulsive disorder; PGC, Psychiatric Genomics Consortium; ANGST, Anxiety NeuroGenetics Study; IOCDF-GC, International Obsessive-Compulsive Disorder Foundation Genetics Collaborative; OCGAS, OCD Collaborative Genetics Association Study.  $P_h$ ,  $P$ -value for heterogeneity.

\*: The ORs are scaled per 0.1 unit increase in ln-transformed retinol.

§: Since the number of instrumental variable SNPs was less than 3, the weighted median, MR-Egger and MR-PRESSO were not included in the analysis method.

**Table S8. The MR analysis results of the causal effects of absolute  $\beta$ -carotene levels on major mental disorders.**

| Outcome          | $P_h$ | MR method <sup>§</sup> | No. SNPs | OR (95% CI)         | $P$ -value |
|------------------|-------|------------------------|----------|---------------------|------------|
| Primary outcome  |       |                        |          |                     |            |
| AD               |       |                        |          |                     |            |
| ANGST Consortium | 0.604 | Fixed-effect IVW       | 2        | 1.348 (0.968-1.878) | 0.077      |
|                  |       | Random effect IVW      | 2        | 1.348 (1.135-1.601) | 0.001      |
|                  |       | Maximum likelihood     | 2        | 1.348 (0.964-1.886) | 0.081      |
| UK Biobank       | 0.349 | Fixed-effect IVW       | 2        | 1.136 (0.947-1.361) | 0.169      |
|                  |       | Random effect IVW      | 2        | 1.136 (0.958-1.345) | 0.142      |
|                  |       | Maximum likelihood     | 2        | 1.136 (0.946-1.365) | 0.171      |
| FinnGen          | 0.987 | Fixed-effect IVW       | 2        | 0.997 (0.867-1.147) | 0.971      |
|                  |       | Random effect IVW      | 2        | 0.997 (0.995-1)     | 0.025      |
|                  |       | Maximum likelihood     | 2        | 0.997 (0.867-1.147) | 0.971      |
| MDD              |       |                        |          |                     |            |
| PGC              | 0.091 | Fixed-effect IVW       | 2        | 1.004 (0.911-1.108) | 0.931      |
|                  |       | Random effect IVW      | 2        | 1.004 (0.851-1.185) | 0.959      |
|                  |       | Maximum likelihood     | 2        | 1.004 (0.91-1.109)  | 0.930      |
| UK Biobank       | 0.803 | Fixed-effect IVW       | 2        | 1.408 (0.635-3.124) | 0.400      |
|                  |       | Random effect IVW      | 2        | 1.408 (1.155-1.718) | 0.001      |
|                  |       | Maximum likelihood     | 2        | 1.409 (0.633-3.132) | 0.401      |
| BIP              |       |                        |          |                     |            |
| PGC              | 0.953 | Fixed-effect IVW       | 2        | 0.946 (0.843-1.062) | 0.349      |
|                  |       | Random effect IVW      | 2        | 0.946 (0.94-0.953)  | <0.001     |
|                  |       | Maximum likelihood     | 2        | 0.946 (0.843-1.062) | 0.351      |
| UK Biobank       | 0.524 | Fixed-effect IVW       | 2        | 0.733 (0.446-1.205) | 0.221      |
|                  |       | Random effect IVW      | 2        | 0.733 (0.534-1.007) | 0.055      |
|                  |       | Maximum likelihood     | 2        | 0.733 (0.444-1.209) | 0.223      |
| FinnGen          | 0.583 | Fixed-effect IVW       | 2        | 0.926 (0.717-1.196) | 0.556      |
|                  |       | Random effect IVW      | 2        | 0.926 (0.805-1.066) | 0.284      |
|                  |       | Maximum likelihood     | 2        | 0.926 (0.717-1.196) | 0.556      |
| SCZ              |       |                        |          |                     |            |
| PGC              | 0.926 | Fixed-effect IVW       | 2        | 1.018 (0.915-1.132) | 0.748      |
|                  |       | Random effect IVW      | 2        | 1.018 (1.008-1.028) | 0.001      |
|                  |       | Maximum likelihood     | 2        | 1.018 (0.915-1.132) | 0.748      |
| UK Biobank       | 0.337 | Fixed-effect IVW       | 2        | 0.743 (0.384-1.436) | 0.377      |
|                  |       | Random effect IVW      | 2        | 0.743 (0.395-1.398) | 0.357      |
|                  |       | Maximum likelihood     | 2        | 0.741 (0.382-1.44)  | 0.377      |
| FinnGen          | 0.570 | Fixed-effect IVW       | 2        | 1.261 (0.89-1.787)  | 0.191      |
|                  |       | Random effect IVW      | 2        | 1.261 (1.035-1.537) | 0.022      |
|                  |       | Maximum likelihood     | 2        | 1.262 (0.888-1.793) | 0.194      |
| PTSD             |       |                        |          |                     |            |
| PGC              | 0.656 | Fixed-effect IVW       | 2        | 0.919 (0.767-1.1)   | 0.357      |
|                  |       | Random effect IVW      | 2        | 0.919 (0.848-0.996) | 0.038      |
|                  |       | Maximum likelihood     | 2        | 0.919 (0.766-1.101) | 0.359      |
| UK Biobank       | 0.832 | Fixed-effect IVW       | 2        | 1.131 (0.317-4.033) | 0.849      |
|                  |       | Random effect IVW      | 2        | 1.131 (0.864-1.482) | 0.370      |

|                          |       |                         |          |                            |              |
|--------------------------|-------|-------------------------|----------|----------------------------|--------------|
| FinnGen                  | 0.881 | Maximum likelihood      | 2        | 1.132 (0.317-4.035)        | 0.849        |
|                          |       | <b>Fixed-effect IVW</b> | <b>2</b> | <b>1.347 (0.867-2.093)</b> | <b>0.184</b> |
|                          |       | Random effect IVW       | 2        | 1.347 (1.261-1.44)         | <0.001       |
|                          |       | Maximum likelihood      | 2        | 1.348 (0.865-2.1)          | 0.188        |
| <b>OCD</b>               |       |                         |          |                            |              |
| IOCDF-GC & OCGAS         | 0.246 | <b>Fixed-effect IVW</b> | <b>2</b> | <b>0.83 (0.546-1.261)</b>  | <b>0.382</b> |
|                          |       | Random effect IVW       | 2        | 0.83 (0.511-1.348)         | 0.451        |
|                          |       | Maximum likelihood      | 2        | 0.828 (0.544-1.263)        | 0.381        |
| UK Biobank               | 0.222 | <b>Fixed-effect IVW</b> | <b>2</b> | <b>1.522 (0.435-5.326)</b> | <b>0.511</b> |
|                          |       | Random effect IVW       | 2        | 1.522 (0.329-7.037)        | 0.591        |
|                          |       | Maximum likelihood      | 2        | 1.529 (0.432-5.409)        | 0.510        |
| FinnGen                  | 0.081 | <b>Fixed-effect IVW</b> | <b>2</b> | <b>0.947 (0.593-1.514)</b> | <b>0.821</b> |
|                          |       | Random effect IVW       | 2        | 0.947 (0.418-2.149)        | 0.897        |
|                          |       | Maximum likelihood      | 2        | 0.946 (0.588-1.522)        | 0.819        |
| <b>Secondary outcome</b> |       |                         |          |                            |              |
| <b>Depression</b>        |       |                         |          |                            |              |
| PGC                      | 0.079 | <b>Fixed-effect IVW</b> | <b>2</b> | <b>1.004 (0.952-1.059)</b> | <b>0.879</b> |
|                          |       | Random effect IVW       | 2        | 1.004 (0.915-1.102)        | 0.931        |
|                          |       | Maximum likelihood      | 2        | 1.004 (0.952-1.059)        | 0.878        |
| FinnGen                  | 0.461 | <b>Fixed-effect IVW</b> | <b>2</b> | <b>0.911 (0.82-1.013)</b>  | <b>0.084</b> |
|                          |       | Random effect IVW       | 2        | 0.911 (0.843-0.985)        | 0.019        |
|                          |       | Maximum likelihood      | 2        | 0.911 (0.818-1.014)        | 0.087        |

The best causal estimation highlighted in bold.

AD, anxiety disorders; MDD, major depressive disorder; BIP, bipolar disorder; SCZ, schizophrenia; PTSD, post-traumatic stress disorder; OCD, obsessive-compulsive disorder; PGC, Psychiatric Genomics Consortium; ANGST, Anxiety NeuroGenetics Study; IOCDF-GC, International Obsessive-Compulsive Disorder Foundation Genetics Collaborative; OCGAS, OCD Collaborative Genetics Association Study.  $P_h$ ,  $P$ -value for heterogeneity.

\*: The ORs are scaled per unit increase in ln-transformed  $\beta$ -carotene.

§: Since the number of instrumental variable SNPs was less than 3, the weighted median, MR-Egger and MR-PRESSO were not included in the analysis method.

**Table S9. The MR analysis results of the causal effects of absolute lycopene levels on major mental disorders.**

| Outcome          | $P_h$ | $P_p$ | MR method              | No. SNPs | OR (95% CI)         | $P$ -value |
|------------------|-------|-------|------------------------|----------|---------------------|------------|
| Primary outcome  |       |       |                        |          |                     |            |
| AD               |       |       |                        |          |                     |            |
| ANGST Consortium | 0.210 | 0.205 | Fixed-effect IVW       | 4        | 0.968 (0.881-1.063) | 0.494      |
|                  |       |       | Random effect IVW      | 4        | 0.968 (0.862-1.086) | 0.577      |
|                  |       |       | Maximum likelihood     | 4        | 0.967 (0.881-1.063) | 0.489      |
|                  |       |       | MR Egger               | 4        | 0.834 (0.694-1.002) | 0.192      |
|                  |       |       | Weighted median        | 4        | 0.934 (0.833-1.047) | 0.240      |
|                  |       |       | MR-PRESSO <sup>†</sup> |          | NA                  | NA         |
| UK Biobank       | 0.964 | 0.612 | Fixed-effect IVW       | 5        | 1.038 (0.977-1.102) | 0.227      |
|                  |       |       | Random effect IVW      | 5        | 1.038 (1.014-1.062) | 0.002      |
|                  |       |       | Maximum likelihood     | 5        | 1.038 (0.977-1.103) | 0.228      |
|                  |       |       | MR Egger               | 5        | 1.066 (0.953-1.193) | 0.342      |
|                  |       |       | Weighted median        | 5        | 1.047 (0.976-1.124) | 0.200      |
|                  |       |       | MR-PRESSO <sup>†</sup> |          | NA                  | NA         |
| FinnGen          | 0.897 | 0.627 | Fixed-effect IVW       | 5        | 0.939 (0.894-0.987) | 0.013      |
|                  |       |       | Random effect IVW      | 5        | 0.939 (0.902-0.977) | 0.002      |
|                  |       |       | Maximum likelihood     | 5        | 0.937 (0.889-0.989) | 0.018      |
|                  |       |       | MR Egger               | 5        | 0.934 (0.855-1.021) | 0.228      |
|                  |       |       | Weighted median        | 5        | 0.947 (0.892-1.006) | 0.075      |
|                  |       |       | MR-PRESSO <sup>†</sup> |          | NA                  | NA         |
| MDD              |       |       |                        |          |                     |            |
| PGC              | 0.013 | 0.082 | Fixed-effect IVW       | 5        | 1.033 (0.997-1.069) | 0.071      |
|                  |       |       | Random effect IVW      | 5        | 1.033 (0.971-1.099) | 0.310      |
|                  |       |       | Maximum likelihood     | 5        | 1.037 (0.998-1.077) | 0.066      |
|                  |       |       | MR Egger               | 5        | 0.95 (0.881-1.024)  | 0.272      |
|                  |       |       | Weighted median        | 5        | 1.01 (0.962-1.06)   | 0.689      |
|                  |       |       | MR-PRESSO <sup>†</sup> |          | NA                  | NA         |
| UK Biobank       | 0.626 | 0.380 | Fixed-effect IVW       | 5        | 1.251 (0.959-1.63)  | 0.098      |
|                  |       |       | Random effect IVW      | 5        | 1.251 (1.01-1.549)  | 0.041      |
|                  |       |       | Maximum likelihood     | 5        | 1.256 (0.962-1.639) | 0.094      |
|                  |       |       | MR Egger               | 5        | 1.554 (0.95-2.542)  | 0.177      |
|                  |       |       | Weighted median        | 5        | 1.101 (0.79-1.533)  | 0.570      |
|                  |       |       | MR-PRESSO <sup>†</sup> |          | NA                  | NA         |
| BIP              |       |       |                        |          |                     |            |
| PGC              | 0.465 | 0.374 | Fixed-effect IVW       | 5        | 1.005 (0.965-1.047) | 0.813      |
|                  |       |       | Random effect IVW      | 5        | 1.005 (0.967-1.045) | 0.803      |
|                  |       |       | Maximum likelihood     | 5        | 1.005 (0.964-1.048) | 0.809      |
|                  |       |       | MR Egger               | 5        | 1.039 (0.964-1.12)  | 0.389      |
|                  |       |       | Weighted median        | 5        | 1.012 (0.957-1.07)  | 0.671      |
|                  |       |       | MR-PRESSO <sup>†</sup> |          | NA                  | NA         |
| UK Biobank       | 0.330 | 0.855 | Fixed-effect IVW       | 5        | 0.922 (0.782-1.088) | 0.338      |
|                  |       |       | Random effect IVW      | 5        | 0.922 (0.772-1.102) | 0.372      |
|                  |       |       | Maximum likelihood     | 5        | 0.919 (0.774-1.091) | 0.332      |
|                  |       |       | MR Egger               | 5        | 0.953 (0.653-1.391) | 0.818      |

|                        |       |                     |                         |          |                           |                         |          |                            |              |
|------------------------|-------|---------------------|-------------------------|----------|---------------------------|-------------------------|----------|----------------------------|--------------|
| FinnGen                | 0.836 | 0.597               | Weighted median         | 5        | 0.979 (0.796-1.203)       | 0.838                   |          |                            |              |
|                        |       |                     | MR-PRESSO <sup>†</sup>  |          | NA                        | NA                      |          |                            |              |
|                        |       |                     | <b>Fixed-effect IVW</b> | <b>5</b> | <b>0.975 (0.89-1.068)</b> | <b>0.587</b>            |          |                            |              |
|                        |       |                     | Random effect IVW       | 5        | 0.975 (0.923-1.03)        | 0.366                   |          |                            |              |
|                        |       |                     | Maximum likelihood      | 5        | 0.975 (0.889-1.069)       | 0.587                   |          |                            |              |
|                        |       |                     | MR Egger                | 5        | 1.015 (0.863-1.195)       | 0.865                   |          |                            |              |
|                        |       |                     | Weighted median         | 5        | 0.985 (0.881-1.1)         | 0.784                   |          |                            |              |
|                        |       |                     | MR-PRESSO <sup>†</sup>  |          | NA                        | NA                      |          |                            |              |
| <b>SCZ</b>             |       |                     |                         |          |                           |                         |          |                            |              |
| PGC                    | 0.212 | 0.158               | <b>Fixed-effect IVW</b> | <b>5</b> | <b>1.003 (0.966-1.04)</b> | <b>0.882</b>            |          |                            |              |
|                        |       |                     | Random effect IVW       | 5        | 1.003 (0.959-1.048)       | 0.902                   |          |                            |              |
|                        |       |                     | Maximum likelihood      | 5        | 1.003 (0.966-1.042)       | 0.880                   |          |                            |              |
|                        |       |                     | MR Egger                | 5        | 0.95 (0.887-1.016)        | 0.232                   |          |                            |              |
|                        |       |                     | Weighted median         | 5        | 0.978 (0.935-1.023)       | 0.337                   |          |                            |              |
|                        |       |                     | MR-PRESSO <sup>†</sup>  |          | NA                        | NA                      |          |                            |              |
|                        |       |                     | UK Biobank              | 0.370    | 0.950                     | <b>Fixed-effect IVW</b> | <b>5</b> | <b>0.982 (0.788-1.223)</b> | <b>0.869</b> |
|                        |       |                     |                         |          |                           | Random effect IVW       | 5        | 0.982 (0.782-1.232)        | 0.873        |
| Maximum likelihood     | 5     | 0.981 (0.784-1.227) |                         |          |                           | 0.866                   |          |                            |              |
| MR Egger               | 5     | 0.968 (0.594-1.577) |                         |          |                           | 0.904                   |          |                            |              |
| Weighted median        | 5     | 1.048 (0.794-1.384) |                         |          |                           | 0.741                   |          |                            |              |
| MR-PRESSO <sup>†</sup> |       | NA                  |                         |          |                           | NA                      |          |                            |              |
| FinnGen                | 0.084 | 0.708               |                         |          |                           | <b>Fixed-effect IVW</b> | <b>5</b> | <b>1.075 (0.948-1.219)</b> | <b>0.257</b> |
|                        |       |                     |                         |          |                           | Random effect IVW       | 5        | 1.075 (0.898-1.287)        | 0.430        |
|                        |       |                     | Maximum likelihood      | 5        | 1.078 (0.948-1.227)       | 0.251                   |          |                            |              |
|                        |       |                     | MR Egger                | 5        | 1.145 (0.797-1.645)       | 0.516                   |          |                            |              |
|                        |       |                     | Weighted median         | 5        | 1.074 (0.919-1.256)       | 0.368                   |          |                            |              |
|                        |       |                     | MR-PRESSO <sup>†</sup>  |          | NA                        | NA                      |          |                            |              |
|                        |       |                     | <b>PTSD</b>             |          |                           |                         |          |                            |              |
|                        |       |                     | PGC                     | 0.986    | 0.797                     | <b>Fixed-effect IVW</b> | <b>5</b> | <b>1.001 (0.937-1.069)</b> | <b>0.969</b> |
| Random effect IVW      | 5     | 1.001 (0.982-1.021) |                         |          |                           | 0.897                   |          |                            |              |
| Maximum likelihood     | 5     | 1.001 (0.937-1.07)  |                         |          |                           | 0.969                   |          |                            |              |
| MR Egger               | 5     | 0.987 (0.873-1.115) |                         |          |                           | 0.842                   |          |                            |              |
| Weighted median        | 5     | 1.007 (0.933-1.087) |                         |          |                           | 0.853                   |          |                            |              |
| MR-PRESSO <sup>†</sup> |       | NA                  |                         |          |                           | NA                      |          |                            |              |
| UK Biobank             | 0.782 | 0.526               |                         |          |                           | <b>Fixed-effect IVW</b> | <b>5</b> | <b>1.111 (0.728-1.697)</b> | <b>0.625</b> |
|                        |       |                     |                         |          |                           | Random effect IVW       | 5        | 1.111 (0.84-1.47)          | 0.460        |
|                        |       |                     | Maximum likelihood      | 5        | 1.113 (0.728-1.703)       | 0.622                   |          |                            |              |
|                        |       |                     | MR Egger                | 5        | 1.416 (0.645-3.108)       | 0.450                   |          |                            |              |
|                        |       |                     | Weighted median         | 5        | 1.063 (0.636-1.776)       | 0.816                   |          |                            |              |
|                        |       |                     | MR-PRESSO <sup>†</sup>  |          | NA                        | NA                      |          |                            |              |
|                        |       |                     | FinnGen                 | 0.597    | 0.670                     | <b>Fixed-effect IVW</b> | <b>5</b> | <b>1.027 (0.878-1.202)</b> | <b>0.738</b> |
|                        |       |                     |                         |          |                           | Random effect IVW       | 5        | 1.027 (0.901-1.171)        | 0.688        |
| Maximum likelihood     | 5     | 1.027 (0.877-1.204) |                         |          |                           | 0.738                   |          |                            |              |
| MR Egger               | 5     | 1.086 (0.82-1.44)   |                         |          |                           | 0.604                   |          |                            |              |
| Weighted median        | 5     | 1.023 (0.846-1.238) |                         |          |                           | 0.812                   |          |                            |              |
| MR-PRESSO <sup>†</sup> |       | NA                  |                         |          |                           | NA                      |          |                            |              |

| OCD                    |       |                     |                        |       |                     |                  |
|------------------------|-------|---------------------|------------------------|-------|---------------------|------------------|
| IOCDF-GC & OCGAS       | 0.367 | 0.603               | Fixed-effect IVW       | 5     | 1.043 (0.895-1.216) | 0.588            |
|                        |       |                     | Random effect IVW      | 5     | 1.043 (0.89-1.223)  | 0.601            |
|                        |       |                     | Maximum likelihood     | 5     | 1.044 (0.895-1.218) | 0.581            |
|                        |       |                     | MR Egger               | 5     | 1.132 (0.817-1.57)  | 0.510            |
|                        |       |                     | Weighted median        | 5     | 1.092 (0.899-1.326) | 0.376            |
|                        |       |                     | MR-PRESSO <sup>†</sup> |       | NA                  | NA               |
|                        |       |                     | UK Biobank             | 0.279 | 0.829               | Fixed-effect IVW |
| Random effect IVW      | 5     | 0.794 (0.496-1.271) |                        |       |                     | 0.336            |
| Maximum likelihood     | 5     | 0.788 (0.514-1.206) |                        |       |                     | 0.272            |
| MR Egger               | 5     | 0.717 (0.264-1.95)  |                        |       |                     | 0.561            |
| Weighted median        | 5     | 0.742 (0.427-1.289) |                        |       |                     | 0.290            |
| MR-PRESSO <sup>†</sup> |       | NA                  |                        |       |                     | NA               |
| FinnGen                | 0.730 | 0.450               |                        |       |                     | Fixed-effect IVW |
|                        |       |                     | Random effect IVW      | 5     | 0.926 (0.822-1.043) | 0.203            |
|                        |       |                     | Maximum likelihood     | 5     | 0.924 (0.778-1.097) | 0.367            |
|                        |       |                     | MR Egger               | 5     | 1.033 (0.766-1.392) | 0.847            |
|                        |       |                     | Weighted median        | 5     | 0.974 (0.798-1.189) | 0.799            |
|                        |       |                     | MR-PRESSO <sup>†</sup> |       | NA                  | NA               |
|                        |       |                     | Secondary outcome      |       |                     |                  |
| Depression             |       |                     |                        |       |                     |                  |
| PGC & UK Biobank       | 0.307 | 0.200               | Fixed-effect IVW       | 5     | 1.004 (0.986-1.022) | 0.693            |
|                        |       |                     | Random effect IVW      | 5     | 1.004 (0.984-1.024) | 0.719            |
|                        |       |                     | Maximum likelihood     | 5     | 1.004 (0.985-1.022) | 0.688            |
|                        |       |                     | MR Egger               | 5     | 0.98 (0.948-1.014)  | 0.328            |
|                        |       |                     | Weighted median        | 5     | 1.002 (0.98-1.026)  | 0.837            |
|                        |       |                     | MR-PRESSO <sup>†</sup> |       | NA                  | NA               |
|                        |       |                     | FinnGen                | 0.265 | 0.307               | Fixed-effect IVW |
| Random effect IVW      | 5     | 0.973 (0.933-1.016) |                        |       |                     | 0.217            |
| Maximum likelihood     | 5     | 0.972 (0.933-1.012) |                        |       |                     | 0.166            |
| MR Egger               | 5     | 1.01 (0.94-1.086)   |                        |       |                     | 0.796            |
| Weighted median        | 5     | 0.996 (0.947-1.046) |                        |       |                     | 0.860            |
| MR-PRESSO <sup>†</sup> |       | NA                  |                        |       |                     | NA               |

The best causal estimation highlighted in bold.

AD, anxiety disorders; MDD, major depressive disorder; BIP, bipolar disorder; SCZ, schizophrenia; PTSD, post-traumatic stress disorder; OCD, obsessive-compulsive disorder; PGC, Psychiatric Genomics Consortium; ANGST, Anxiety NeuroGenetics Study; IOCDF-GC, International Obsessive-Compulsive Disorder Foundation Genetics Collaborative; OCGAS, OCD Collaborative Genetics Association Study.  $P_h$ ,  $P$ -value for heterogeneity;  $P_p$ ,  $P$ -value for pleiotropy; NA, not applicable;

\*: The ORs are scaled per  $\mu\text{g/dL}$  increase in lycopene.

†: No significant outliers.

**Table S10. The MR analysis results of the causal effects of  $\alpha$ -tocopherol metabolites on major mental disorders.**

| Outcome          | $P_h$ | $P_p$ | MR method              | No. SNPs | OR (95% CI)         | $P$ -value |
|------------------|-------|-------|------------------------|----------|---------------------|------------|
| Primary outcome  |       |       |                        |          |                     |            |
| AD               |       |       |                        |          |                     |            |
| ANGST Consortium | 0.878 | 0.329 | Fixed-effect IVW       | 9        | 0.995 (0.893-1.11)  | 0.933      |
|                  |       |       | Random effect IVW      | 9        | 0.995 (0.924-1.072) | 0.902      |
|                  |       |       | Maximum likelihood     | 9        | 0.995 (0.892-1.111) | 0.932      |
|                  |       |       | MR Egger               | 9        | 1.175 (0.846-1.63)  | 0.368      |
|                  |       |       | Weighted median        | 9        | 1.039 (0.9-1.2)     | 0.598      |
|                  |       |       | MR-PRESSO <sup>†</sup> |          | NA                  | NA         |
| UK Biobank       | 0.558 | 0.986 | Fixed-effect IVW       | 11       | 0.977 (0.928-1.028) | 0.363      |
|                  |       |       | Random effect IVW      | 11       | 0.977 (0.931-1.024) | 0.330      |
|                  |       |       | Maximum likelihood     | 11       | 0.976 (0.926-1.028) | 0.357      |
|                  |       |       | MR Egger               | 11       | 0.976 (0.864-1.101) | 0.698      |
|                  |       |       | Weighted median        | 11       | 0.99 (0.923-1.062)  | 0.788      |
|                  |       |       | MR-PRESSO <sup>†</sup> |          | NA                  | NA         |
| FinnGen          | 0.011 | 0.086 | Fixed-effect IVW       | 11       | 0.956 (0.921-0.993) | 0.018      |
|                  |       |       | Random effect IVW      | 11       | 0.956 (0.904-1.012) | 0.120      |
|                  |       |       | Maximum likelihood     | 11       | 0.953 (0.917-0.991) | 0.016      |
|                  |       |       | MR Egger               | 11       | 0.848 (0.742-0.968) | 0.037      |
|                  |       |       | Weighted median        | 11       | 0.958 (0.91-1.008)  | 0.101      |
|                  |       |       | MR-PRESSO              | 10       | 0.967 (0.931-1.005) | 0.084      |
| MDD              |       |       |                        |          |                     |            |
| PGC              | 0.519 | 0.392 | Fixed-effect IVW       | 11       | 0.999 (0.973-1.027) | 0.963      |
|                  |       |       | Random effect IVW      | 11       | 0.999 (0.974-1.026) | 0.961      |
|                  |       |       | Maximum likelihood     | 11       | 0.999 (0.972-1.027) | 0.962      |
|                  |       |       | MR Egger               | 11       | 0.973 (0.912-1.038) | 0.425      |
|                  |       |       | Weighted median        | 11       | 1.009 (0.974-1.044) | 0.619      |
|                  |       |       | MR-PRESSO <sup>†</sup> |          | NA                  | NA         |
| UK Biobank       | 0.031 | 0.052 | Fixed-effect IVW       | 11       | 1.045 (0.835-1.308) | 0.702      |
|                  |       |       | Random effect IVW      | 11       | 1.045 (0.762-1.433) | 0.786      |
|                  |       |       | Maximum likelihood     | 11       | 1.048 (0.831-1.321) | 0.693      |
|                  |       |       | MR Egger               | 11       | 2.146 (1.183-3.892) | 0.033      |
|                  |       |       | Weighted median        | 11       | 1.033 (0.76-1.405)  | 0.835      |
|                  |       |       | MR-PRESSO <sup>†</sup> |          | NA                  | NA         |
| BIP              |       |       |                        |          |                     |            |
| PGC              | 0.680 | 0.932 | Fixed-effect IVW       | 11       | 1.015 (0.984-1.048) | 0.346      |
|                  |       |       | Random effect IVW      | 11       | 1.015 (0.988-1.043) | 0.276      |
|                  |       |       | Maximum likelihood     | 11       | 1.016 (0.984-1.049) | 0.340      |
|                  |       |       | MR Egger               | 11       | 1.012 (0.938-1.092) | 0.763      |
|                  |       |       | Weighted median        | 11       | 1.016 (0.974-1.059) | 0.459      |
|                  |       |       | MR-PRESSO <sup>†</sup> |          | NA                  | NA         |
| UK Biobank       | 0.272 | 0.429 | Fixed-effect IVW       | 11       | 1.069 (0.93-1.23)   | 0.349      |
|                  |       |       | Random effect IVW      | 11       | 1.069 (0.916-1.248) | 0.397      |
|                  |       |       | Maximum likelihood     | 11       | 1.074 (0.93-1.241)  | 0.330      |
|                  |       |       | MR Egger               | 11       | 0.927 (0.638-1.346) | 0.699      |

|                        |       |                     |                         |           |                            |                         |           |                            |              |
|------------------------|-------|---------------------|-------------------------|-----------|----------------------------|-------------------------|-----------|----------------------------|--------------|
| FinnGen                | 0.184 | 0.546               | Weighted median         | 11        | 1.129 (0.927-1.376)        | 0.228                   |           |                            |              |
|                        |       |                     | MR-PRESSO <sup>†</sup>  |           | NA                         | NA                      |           |                            |              |
|                        |       |                     | <b>Fixed-effect IVW</b> | <b>11</b> | <b>0.992 (0.927-1.062)</b> | <b>0.825</b>            |           |                            |              |
|                        |       |                     | Random effect IVW       | 11        | 0.992 (0.916-1.075)        | 0.850                   |           |                            |              |
|                        |       |                     | Maximum likelihood      | 11        | 0.992 (0.925-1.064)        | 0.827                   |           |                            |              |
|                        |       |                     | MR Egger                | 11        | 0.93 (0.748-1.156)         | 0.532                   |           |                            |              |
|                        |       |                     | Weighted median         | 11        | 1.001 (0.911-1.1)          | 0.979                   |           |                            |              |
|                        |       |                     | MR-PRESSO <sup>†</sup>  |           | NA                         | NA                      |           |                            |              |
| <b>SCZ</b>             |       |                     |                         |           |                            |                         |           |                            |              |
| PGC                    | 0.124 | 0.172               | <b>Fixed-effect IVW</b> | <b>11</b> | <b>0.992 (0.964-1.022)</b> | <b>0.608</b>            |           |                            |              |
|                        |       |                     | Random effect IVW       | 11        | 0.992 (0.957-1.029)        | 0.678                   |           |                            |              |
|                        |       |                     | Maximum likelihood      | 11        | 0.992 (0.963-1.023)        | 0.614                   |           |                            |              |
|                        |       |                     | MR Egger                | 11        | 0.938 (0.865-1.018)        | 0.160                   |           |                            |              |
|                        |       |                     | Weighted median         | 11        | 0.981 (0.941-1.023)        | 0.374                   |           |                            |              |
|                        |       |                     | MR-PRESSO <sup>†</sup>  |           | NA                         | NA                      |           |                            |              |
|                        |       |                     | UK Biobank              | 0.793     | 0.898                      | <b>Fixed-effect IVW</b> | <b>11</b> | <b>0.948 (0.788-1.142)</b> | <b>0.576</b> |
|                        |       |                     |                         |           |                            | Random effect IVW       | 11        | 0.948 (0.819-1.098)        | 0.479        |
| Maximum likelihood     | 11    | 0.947 (0.784-1.144) |                         |           |                            | 0.572                   |           |                            |              |
| MR Egger               | 11    | 0.974 (0.627-1.515) |                         |           |                            | 0.911                   |           |                            |              |
| Weighted median        | 11    | 1.051 (0.818-1.351) |                         |           |                            | 0.696                   |           |                            |              |
| MR-PRESSO <sup>†</sup> |       | NA                  |                         |           |                            | NA                      |           |                            |              |
| FinnGen                | 0.522 | 0.216               |                         |           |                            | <b>Fixed-effect IVW</b> | <b>11</b> | <b>0.886 (0.808-0.972)</b> | <b>0.011</b> |
|                        |       |                     |                         |           |                            | Random effect IVW       | 11        | 0.886 (0.811-0.968)        | 0.008        |
|                        |       |                     | Maximum likelihood      | 11        | 0.883 (0.801-0.972)        | 0.011                   |           |                            |              |
|                        |       |                     | MR Egger                | 11        | 1.033 (0.81-1.319)         | 0.798                   |           |                            |              |
|                        |       |                     | Weighted median         | 11        | 0.875 (0.772-0.993)        | 0.039                   |           |                            |              |
|                        |       |                     | MR-PRESSO <sup>†</sup>  |           | NA                         | NA                      |           |                            |              |
|                        |       |                     | <b>PTSD</b>             |           |                            |                         |           |                            |              |
|                        |       |                     | PGC                     | 0.567     | 0.851                      | <b>Fixed-effect IVW</b> | <b>11</b> | <b>1.024 (0.973-1.077)</b> | <b>0.362</b> |
| Random effect IVW      | 11    | 1.024 (0.977-1.073) |                         |           |                            | 0.327                   |           |                            |              |
| Maximum likelihood     | 11    | 1.025 (0.973-1.079) |                         |           |                            | 0.355                   |           |                            |              |
| MR Egger               | 11    | 1.013 (0.898-1.143) |                         |           |                            | 0.841                   |           |                            |              |
| Weighted median        | 11    | 1.038 (0.97-1.11)   |                         |           |                            | 0.285                   |           |                            |              |
| MR-PRESSO <sup>†</sup> |       | NA                  |                         |           |                            | NA                      |           |                            |              |
| UK Biobank             | 0.758 | 0.953               |                         |           |                            | <b>Fixed-effect IVW</b> | <b>11</b> | <b>0.868 (0.607-1.241)</b> | <b>0.438</b> |
|                        |       |                     |                         |           |                            | Random effect IVW       | 11        | 0.868 (0.648-1.162)        | 0.341        |
|                        |       |                     | Maximum likelihood      | 11        | 0.863 (0.598-1.247)        | 0.433                   |           |                            |              |
|                        |       |                     | MR Egger                | 11        | 0.847 (0.362-1.982)        | 0.711                   |           |                            |              |
|                        |       |                     | Weighted median         | 11        | 0.802 (0.489-1.314)        | 0.381                   |           |                            |              |
|                        |       |                     | MR-PRESSO <sup>†</sup>  |           | NA                         | NA                      |           |                            |              |
|                        |       |                     | FinnGen                 | 0.603     | 0.826                      | <b>Fixed-effect IVW</b> | <b>11</b> | <b>1.018 (0.906-1.145)</b> | <b>0.761</b> |
|                        |       |                     |                         |           |                            | Random effect IVW       | 11        | 1.018 (0.916-1.133)        | 0.738        |
| Maximum likelihood     | 11    | 1.018 (0.904-1.147) |                         |           |                            | 0.764                   |           |                            |              |
| MR Egger               | 11    | 0.985 (0.723-1.343) |                         |           |                            | 0.927                   |           |                            |              |
| Weighted median        | 11    | 1.036 (0.886-1.211) |                         |           |                            | 0.660                   |           |                            |              |
| MR-PRESSO <sup>†</sup> |       | NA                  |                         |           |                            | NA                      |           |                            |              |

| OCD               |       |       |                        |    |                     |       |
|-------------------|-------|-------|------------------------|----|---------------------|-------|
| IOCDF-GC & OCGAS  | 0.157 | 0.906 | Fixed-effect IVW       | 11 | 0.927 (0.825-1.04)  | 0.198 |
|                   |       |       | Random effect IVW      | 11 | 0.927 (0.807-1.065) | 0.283 |
|                   |       |       | Maximum likelihood     | 11 | 0.922 (0.818-1.04)  | 0.187 |
|                   |       |       | MR Egger               | 11 | 0.946 (0.663-1.349) | 0.765 |
|                   |       |       | Weighted median        | 11 | 0.961 (0.813-1.136) | 0.642 |
|                   |       |       | MR-PRESSO <sup>†</sup> |    | NA                  | NA    |
| UK Biobank        | 0.518 | 0.136 | Fixed-effect IVW       | 11 | 1.196 (0.84-1.703)  | 0.320 |
|                   |       |       | Random effect IVW      | 11 | 1.196 (0.853-1.677) | 0.298 |
|                   |       |       | Maximum likelihood     | 11 | 1.212 (0.846-1.737) | 0.293 |
|                   |       |       | MR Egger               | 11 | 2.258 (0.977-5.219) | 0.089 |
|                   |       |       | Weighted median        | 11 | 1.163 (0.735-1.843) | 0.519 |
|                   |       |       | MR-PRESSO <sup>†</sup> |    | NA                  | NA    |
| IOCDF-GC & OCGAS  | 0.803 | 0.737 | Fixed-effect IVW       | 11 | 0.962 (0.849-1.09)  | 0.540 |
|                   |       |       | Random effect IVW      | 11 | 0.962 (0.872-1.061) | 0.435 |
|                   |       |       | Maximum likelihood     | 11 | 0.96 (0.846-1.091)  | 0.535 |
|                   |       |       | MR Egger               | 11 | 0.911 (0.655-1.268) | 0.594 |
|                   |       |       | Weighted median        | 11 | 0.996 (0.844-1.176) | 0.963 |
|                   |       |       | MR-PRESSO <sup>†</sup> |    | NA                  | NA    |
| Secondary outcome |       |       |                        |    |                     |       |
| Depression        |       |       |                        |    |                     |       |
| PGC & UK Biobank  | 0.916 | 0.608 | Fixed-effect IVW       | 11 | 0.996 (0.981-1.011) | 0.568 |
|                   |       |       | Random effect IVW      | 11 | 0.996 (0.986-1.006) | 0.400 |
|                   |       |       | Maximum likelihood     | 11 | 0.996 (0.981-1.011) | 0.565 |
|                   |       |       | MR Egger               | 11 | 1.004 (0.97-1.04)   | 0.815 |
|                   |       |       | Weighted median        | 11 | 0.999 (0.98-1.019)  | 0.920 |
|                   |       |       | MR-PRESSO <sup>†</sup> |    | NA                  | NA    |
| FinnGen           | 0.629 | 0.569 | Fixed-effect IVW       | 11 | 0.97 (0.943-0.998)  | 0.035 |
|                   |       |       | Random effect IVW      | 11 | 0.97 (0.946-0.995)  | 0.018 |
|                   |       |       | Maximum likelihood     | 11 | 0.97 (0.942-0.998)  | 0.036 |
|                   |       |       | MR Egger               | 11 | 0.95 (0.882-1.024)  | 0.212 |
|                   |       |       | Weighted median        | 11 | 0.98 (0.943-1.019)  | 0.314 |
|                   |       |       | MR-PRESSO <sup>†</sup> |    | NA                  | NA    |

The best causal estimation highlighted in bold.

AD, anxiety disorders; MDD, major depressive disorder; BIP, bipolar disorder; SCZ, schizophrenia; PTSD, post-traumatic stress disorder; OCD, obsessive-compulsive disorder; PGC, Psychiatric Genomics Consortium; ANGST, Anxiety NeuroGenetics Study; IOCDF-GC, International Obsessive-Compulsive Disorder Foundation Genetics Collaborative; OCGAS, OCD Collaborative Genetics Association Study.  $P_h$ ,  $P$ -value for heterogeneity;  $P_p$ ,  $P$ -value for pleiotropy; NA, not applicable;

\*: The ORs are scaled per 0.1 unit increase in log-transformed  $\alpha$ -tocopherol.

†: No significant outliers.

Table S11. The MR analysis results of the causal effects of  $\gamma$ -tocopherol metabolites on major mental disorders.

| Outcome          | $P_h$ | $P_p$ | MR method              | No. SNPs | OR (95% CI)         | $P$ -value |
|------------------|-------|-------|------------------------|----------|---------------------|------------|
| Primary outcome  |       |       |                        |          |                     |            |
| AD               |       |       |                        |          |                     |            |
| ANGST Consortium | 0.042 | 0.290 | Fixed-effect IVW       | 12       | 1.004 (0.953-1.058) | 0.884      |
|                  |       |       | Random effect IVW      | 12       | 1.004 (0.935-1.078) | 0.914      |
|                  |       |       | Maximum likelihood     | 12       | 1.004 (0.951-1.06)  | 0.881      |
|                  |       |       | MR Egger               | 12       | 0.915 (0.766-1.093) | 0.349      |
|                  |       |       | Weighted median        | 12       | 1.001 (0.925-1.084) | 0.978      |
|                  |       |       | MR-PRESSO <sup>†</sup> |          | NA                  | NA         |
| UK Biobank       | 0.066 | 0.048 | Fixed-effect IVW       | 13       | 1.003 (0.978-1.029) | 0.822      |
|                  |       |       | Random effect IVW      | 13       | 1.003 (0.97-1.036)  | 0.862      |
|                  |       |       | Maximum likelihood     | 13       | 1.003 (0.977-1.03)  | 0.815      |
|                  |       |       | MR Egger               | 13       | 0.941 (0.883-1.002) | 0.084      |
|                  |       |       | Weighted median        | 13       | 1.002 (0.966-1.04)  | 0.902      |
|                  |       |       | MR-PRESSO <sup>†</sup> |          | NA                  | NA         |
| FinnGen          | 0.122 | 0.770 | Fixed-effect IVW       | 13       | 0.997 (0.979-1.015) | 0.722      |
|                  |       |       | Random effect IVW      | 13       | 0.997 (0.975-1.019) | 0.770      |
|                  |       |       | Maximum likelihood     | 13       | 0.996 (0.978-1.016) | 0.717      |
|                  |       |       | MR Egger               | 13       | 1.003 (0.955-1.053) | 0.899      |
|                  |       |       | Weighted median        | 13       | 1.006 (0.978-1.034) | 0.686      |
|                  |       |       | MR-PRESSO <sup>†</sup> |          | NA                  | NA         |
| MDD              |       |       |                        |          |                     |            |
| PGC              | 0.545 | 0.116 | Fixed-effect IVW       | 13       | 0.985 (0.971-0.999) | 0.033      |
|                  |       |       | Random effect IVW      | 13       | 0.985 (0.972-0.998) | 0.025      |
|                  |       |       | Maximum likelihood     | 13       | 0.985 (0.971-0.999) | 0.031      |
|                  |       |       | MR Egger               | 13       | 0.963 (0.934-0.992) | 0.030      |
|                  |       |       | Weighted median        | 13       | 0.982 (0.963-1.001) | 0.063      |
|                  |       |       | MR-PRESSO <sup>†</sup> |          | NA                  | NA         |
| UK Biobank       | 0.149 | 0.190 | Fixed-effect IVW       | 13       | 0.878 (0.785-0.982) | 0.023      |
|                  |       |       | Random effect IVW      | 13       | 0.878 (0.769-1.003) | 0.056      |
|                  |       |       | Maximum likelihood     | 13       | 0.872 (0.772-0.984) | 0.026      |
|                  |       |       | MR Egger               | 13       | 1.051 (0.792-1.395) | 0.736      |
|                  |       |       | Weighted median        | 13       | 0.91 (0.77-1.075)   | 0.266      |
|                  |       |       | MR-PRESSO <sup>†</sup> |          | NA                  | NA         |
| BIP              |       |       |                        |          |                     |            |
| PGC              | 0.008 | 0.133 | Fixed-effect IVW       | 13       | 1.013 (0.997-1.029) | 0.102      |
|                  |       |       | Random effect IVW      | 13       | 1.013 (0.99-1.038)  | 0.273      |
|                  |       |       | Maximum likelihood     | 13       | 1.015 (0.998-1.033) | 0.090      |
|                  |       |       | MR Egger               | 13       | 0.979 (0.934-1.026) | 0.395      |
|                  |       |       | Weighted median        | 13       | 1.022 (0.997-1.047) | 0.090      |
|                  |       |       | MR-PRESSO              | 12       | 1.008 (0.992-1.025) | 0.333      |
| UK Biobank       | 0.078 | 0.301 | Fixed-effect IVW       | 13       | 0.992 (0.926-1.064) | 0.829      |
|                  |       |       | Random effect IVW      | 13       | 0.992 (0.908-1.084) | 0.865      |
|                  |       |       | Maximum likelihood     | 13       | 0.992 (0.922-1.067) | 0.825      |
|                  |       |       | MR Egger               | 13       | 1.092 (0.899-1.327) | 0.393      |

|                        |       |                     |                         |           |                            |                         |
|------------------------|-------|---------------------|-------------------------|-----------|----------------------------|-------------------------|
| FinnGen                | 0.768 | 0.578               | Weighted median         | 13        | 1.015 (0.922-1.118)        | 0.755                   |
|                        |       |                     | MR-PRESSO <sup>†</sup>  |           | NA                         | NA                      |
|                        |       |                     | <b>Fixed-effect IVW</b> | <b>13</b> | <b>1.016 (0.982-1.05)</b>  | <b>0.366</b>            |
|                        |       |                     | Random effect IVW       | 13        | 1.016 (0.988-1.044)        | 0.275                   |
|                        |       |                     | Maximum likelihood      | 13        | 1.016 (0.982-1.051)        | 0.373                   |
|                        |       |                     | MR Egger                | 13        | 1.034 (0.963-1.111)        | 0.371                   |
|                        |       |                     | Weighted median         | 13        | 1.025 (0.978-1.074)        | 0.311                   |
| <b>SCZ</b>             |       |                     |                         |           |                            |                         |
| PGC                    | 0.545 | 0.695               | <b>Fixed-effect IVW</b> | <b>13</b> | <b>1.001 (0.987-1.016)</b> | <b>0.851</b>            |
|                        |       |                     | Random effect IVW       | 13        | 1.001 (0.988-1.015)        | 0.843                   |
|                        |       |                     | Maximum likelihood      | 13        | 1.001 (0.987-1.017)        | 0.847                   |
|                        |       |                     | MR Egger                | 13        | 1.007 (0.976-1.039)        | 0.666                   |
|                        |       |                     | Weighted median         | 13        | 0.998 (0.978-1.018)        | 0.836                   |
|                        |       |                     | MR-PRESSO <sup>†</sup>  |           | NA                         | NA                      |
|                        |       |                     | UK Biobank              | 0.330     | 0.268                      | <b>Fixed-effect IVW</b> |
| Random effect IVW      | 13    | 0.985 (0.893-1.086) |                         |           |                            | 0.759                   |
| Maximum likelihood     | 13    | 0.984 (0.895-1.081) |                         |           |                            | 0.736                   |
| MR Egger               | 13    | 0.879 (0.709-1.089) |                         |           |                            | 0.262                   |
| Weighted median        | 13    | 0.93 (0.818-1.057)  |                         |           |                            | 0.266                   |
| MR-PRESSO <sup>†</sup> |       | NA                  |                         |           |                            | NA                      |
| FinnGen                | 0.858 | 0.358               |                         |           |                            | <b>Fixed-effect IVW</b> |
|                        |       |                     | Random effect IVW       | 13        | 1.009 (0.974-1.045)        | 0.627                   |
|                        |       |                     | Maximum likelihood      | 13        | 1.009 (0.963-1.057)        | 0.710                   |
|                        |       |                     | MR Egger                | 13        | 1.052 (0.954-1.16)         | 0.330                   |
|                        |       |                     | Weighted median         | 13        | 1.006 (0.945-1.07)         | 0.859                   |
|                        |       |                     | MR-PRESSO <sup>†</sup>  |           | NA                         | NA                      |
|                        |       |                     | <b>PTSD</b>             |           |                            |                         |
| PGC                    | 0.521 | 0.408               | <b>Fixed-effect IVW</b> | <b>13</b> | <b>1.014 (0.988-1.04)</b>  | <b>0.299</b>            |
|                        |       |                     | Random effect IVW       | 13        | 1.014 (0.989-1.039)        | 0.280                   |
|                        |       |                     | Maximum likelihood      | 13        | 1.014 (0.988-1.041)        | 0.308                   |
|                        |       |                     | MR Egger                | 13        | 0.993 (0.94-1.048)         | 0.793                   |
|                        |       |                     | Weighted median         | 13        | 1 (0.965-1.036)            | 0.992                   |
|                        |       |                     | MR-PRESSO <sup>†</sup>  |           | NA                         | NA                      |
|                        |       |                     | UK Biobank              | 0.754     | 0.749                      | <b>Fixed-effect IVW</b> |
| Random effect IVW      | 13    | 1.206 (1.039-1.4)   |                         |           |                            | 0.014                   |
| Maximum likelihood     | 13    | 1.21 (1.01-1.449)   |                         |           |                            | 0.039                   |
| MR Egger               | 13    | 1.279 (0.863-1.898) |                         |           |                            | 0.246                   |
| Weighted median        | 13    | 1.276 (1.013-1.609) |                         |           |                            | 0.039                   |
| MR-PRESSO <sup>†</sup> |       | NA                  |                         |           |                            | NA                      |
| FinnGen                | 0.610 | 0.369               |                         |           |                            | <b>Fixed-effect IVW</b> |
|                        |       |                     | Random effect IVW       | 13        | 1.002 (0.95-1.056)         | 0.951                   |
|                        |       |                     | Maximum likelihood      | 13        | 1.002 (0.944-1.063)        | 0.954                   |
|                        |       |                     | MR Egger                | 13        | 1.054 (0.933-1.191)        | 0.413                   |
|                        |       |                     | Weighted median         | 13        | 0.973 (0.894-1.058)        | 0.520                   |
|                        |       |                     | MR-PRESSO <sup>†</sup>  |           | NA                         | NA                      |

| OCD               |       |       |                        |    |                     |       |
|-------------------|-------|-------|------------------------|----|---------------------|-------|
| PGC               | 0.142 | 0.880 | Fixed-effect IVW       | 13 | 0.974 (0.921-1.031) | 0.365 |
|                   |       |       | Random effect IVW      | 13 | 0.974 (0.911-1.042) | 0.449 |
|                   |       |       | Maximum likelihood     | 13 | 0.973 (0.919-1.031) | 0.358 |
|                   |       |       | MR Egger               | 13 | 0.965 (0.835-1.114) | 0.634 |
|                   |       |       | Weighted median        | 13 | 0.976 (0.901-1.058) | 0.557 |
|                   |       |       | MR-PRESSO <sup>†</sup> |    | NA                  | NA    |
|                   |       |       |                        |    |                     |       |
| UK Biobank        | 0.853 | 0.355 | Fixed-effect IVW       | 13 | 0.983 (0.824-1.172) | 0.845 |
|                   |       |       | Random effect IVW      | 13 | 0.983 (0.859-1.125) | 0.799 |
|                   |       |       | Maximum likelihood     | 13 | 0.982 (0.822-1.174) | 0.845 |
|                   |       |       | MR Egger               | 13 | 0.828 (0.561-1.222) | 0.362 |
|                   |       |       | Weighted median        | 13 | 1.01 (0.799-1.279)  | 0.931 |
|                   |       |       | MR-PRESSO <sup>†</sup> |    | NA                  | NA    |
|                   |       |       |                        |    |                     |       |
| FinnGen           | 0.721 | 0.194 | Fixed-effect IVW       | 13 | 1.002 (0.942-1.065) | 0.960 |
|                   |       |       | Random effect IVW      | 13 | 1.002 (0.95-1.056)  | 0.953 |
|                   |       |       | Maximum likelihood     | 13 | 1.002 (0.941-1.066) | 0.960 |
|                   |       |       | MR Egger               | 13 | 1.085 (0.954-1.234) | 0.241 |
|                   |       |       | Weighted median        | 13 | 1.013 (0.931-1.102) | 0.771 |
|                   |       |       | MR-PRESSO <sup>†</sup> |    | NA                  | NA    |
|                   |       |       |                        |    |                     |       |
| Secondary outcome |       |       |                        |    |                     |       |
| Depression        |       |       |                        |    |                     |       |
| PGC & UK Biobank  | 0.051 | 0.197 | Fixed-effect IVW       | 12 | 0.997 (0.989-1.005) | 0.438 |
|                   |       |       | Random effect IVW      | 12 | 0.997 (0.987-1.007) | 0.561 |
|                   |       |       | Maximum likelihood     | 12 | 0.997 (0.989-1.005) | 0.419 |
|                   |       |       | MR Egger               | 12 | 0.984 (0.964-1.005) | 0.164 |
|                   |       |       | Weighted median        | 12 | 0.996 (0.984-1.007) | 0.465 |
|                   |       |       | MR-PRESSO <sup>†</sup> |    | NA                  | NA    |
|                   |       |       |                        |    |                     |       |
| FinnGen           | 0.240 | 0.492 | Fixed-effect IVW       | 13 | 1 (0.986-1.014)     | 0.989 |
|                   |       |       | Random effect IVW      | 13 | 1 (0.985-1.016)     | 0.990 |
|                   |       |       | Maximum likelihood     | 13 | 1 (0.986-1.015)     | 0.989 |
|                   |       |       | MR Egger               | 13 | 0.99 (0.957-1.023)  | 0.548 |
|                   |       |       | Weighted median        | 13 | 0.997 (0.977-1.018) | 0.805 |
|                   |       |       | MR-PRESSO <sup>†</sup> |    | NA                  | NA    |
|                   |       |       |                        |    |                     |       |

The best causal estimation highlighted in bold.

AD, anxiety disorders; MDD, major depressive disorder; BIP, bipolar disorder; SCZ, schizophrenia; PTSD, post-traumatic stress disorder; OCD, obsessive-compulsive disorder; PGC, Psychiatric Genomics Consortium; ANGST, Anxiety NeuroGenetics Study; IOCDF-GC, International Obsessive-Compulsive Disorder Foundation Genetics Collaborative; OCGAS, OCD Collaborative Genetics Association Study.  $P_h$ ,  $P$ -value for heterogeneity;  $P_p$ ,  $P$ -value for pleiotropy; NA, not applicable;

\*: The ORs are scaled per 0.1 unit increase in log-transformed  $\gamma$ -tocopherol.

†: No significant outliers.

**Table S12. The MR analysis results of the causal effects of ascorbate metabolites on major mental disorders.**

| Outcome          | $P_h$ | $P_p$ | MR method              | No. SNPs | OR (95% CI)         | $P$ -value |
|------------------|-------|-------|------------------------|----------|---------------------|------------|
| Primary outcome  |       |       |                        |          |                     |            |
| AD               |       |       |                        |          |                     |            |
| ANGST Consortium | 0.731 | 0.609 | Fixed-effect IVW       | 13       | 1.225 (0.965-1.556) | 0.095      |
|                  |       |       | Random effect IVW      | 13       | 1.225 (1-1.501)     | 0.050      |
|                  |       |       | Maximum likelihood     | 13       | 1.232 (0.963-1.578) | 0.097      |
|                  |       |       | MR Egger               | 13       | 1.095 (0.678-1.771) | 0.717      |
|                  |       |       | Weighted median        | 13       | 1.197 (0.866-1.655) | 0.276      |
|                  |       |       | MR-PRESSO <sup>†</sup> |          | NA                  | NA         |
| UK Biobank       | 0.592 | 0.969 | Fixed-effect IVW       | 14       | 1.029 (0.94-1.126)  | 0.533      |
|                  |       |       | Random effect IVW      | 14       | 1.029 (0.947-1.119) | 0.502      |
|                  |       |       | Maximum likelihood     | 14       | 1.03 (0.941-1.127)  | 0.527      |
|                  |       |       | MR Egger               | 14       | 1.032 (0.881-1.208) | 0.704      |
|                  |       |       | Weighted median        | 14       | 1.038 (0.918-1.174) | 0.550      |
|                  |       |       | MR-PRESSO <sup>†</sup> |          | NA                  | NA         |
| FinnGen          | 0.370 | 0.461 | Fixed-effect IVW       | 14       | 1.014 (0.942-1.091) | 0.714      |
|                  |       |       | Random effect IVW      | 14       | 1.014 (0.939-1.094) | 0.724      |
|                  |       |       | Maximum likelihood     | 14       | 1.014 (0.941-1.093) | 0.711      |
|                  |       |       | MR Egger               | 14       | 0.972 (0.85-1.111)  | 0.682      |
|                  |       |       | Weighted median        | 14       | 1.014 (0.92-1.119)  | 0.774      |
|                  |       |       | MR-PRESSO <sup>†</sup> |          | NA                  | NA         |
| MDD              |       |       |                        |          |                     |            |
| PGC              | 0.348 | 0.913 | Fixed-effect IVW       | 14       | 1.061 (1-1.126)     | 0.050      |
|                  |       |       | Random effect IVW      | 14       | 1.061 (0.997-1.13)  | 0.062      |
|                  |       |       | Maximum likelihood     | 14       | 1.063 (1.001-1.13)  | 0.047      |
|                  |       |       | MR Egger               | 14       | 1.055 (0.933-1.194) | 0.411      |
|                  |       |       | Weighted median        | 14       | 1.079 (0.995-1.17)  | 0.066      |
|                  |       |       | MR-PRESSO <sup>†</sup> |          | NA                  | NA         |
| UK Biobank       | 0.121 | 0.623 | Fixed-effect IVW       | 14       | 0.657 (0.442-0.976) | 0.037      |
|                  |       |       | Random effect IVW      | 14       | 0.657 (0.407-1.061) | 0.086      |
|                  |       |       | Maximum likelihood     | 14       | 0.657 (0.435-0.992) | 0.046      |
|                  |       |       | MR Egger               | 14       | 0.789 (0.332-1.872) | 0.601      |
|                  |       |       | Weighted median        | 14       | 0.555 (0.295-1.044) | 0.068      |
|                  |       |       | MR-PRESSO <sup>†</sup> |          | NA                  | NA         |
| BIP              |       |       |                        |          |                     |            |
| PGC              | 0.138 | 0.288 | Fixed-effect IVW       | 14       | 1.037 (0.974-1.105) | 0.258      |
|                  |       |       | Random effect IVW      | 14       | 1.037 (0.962-1.119) | 0.343      |
|                  |       |       | Maximum likelihood     | 14       | 1.039 (0.974-1.109) | 0.241      |
|                  |       |       | MR Egger               | 14       | 1.105 (0.966-1.264) | 0.171      |
|                  |       |       | Weighted median        | 14       | 1.05 (0.956-1.152)  | 0.307      |
|                  |       |       | MR-PRESSO <sup>†</sup> |          | NA                  | NA         |
| UK Biobank       | 0.927 | 0.742 | Fixed-effect IVW       | 14       | 0.883 (0.69-1.129)  | 0.320      |
|                  |       |       | Random effect IVW      | 14       | 0.883 (0.742-1.05)  | 0.159      |
|                  |       |       | Maximum likelihood     | 14       | 0.885 (0.689-1.137) | 0.339      |
|                  |       |       | MR Egger               | 14       | 0.938 (0.609-1.444) | 0.776      |

|             |       |       |                         |           |                            |              |
|-------------|-------|-------|-------------------------|-----------|----------------------------|--------------|
| FinnGen     | 0.847 | 0.881 | Weighted median         | 14        | 0.923 (0.643-1.325)        | 0.664        |
|             |       |       | MR-PRESSO <sup>†</sup>  |           | NA                         | NA           |
|             |       |       | <b>Fixed-effect IVW</b> | <b>14</b> | <b>1.045 (0.914-1.196)</b> | <b>0.517</b> |
|             |       |       | Random effect IVW       | 14        | 1.045 (0.941-1.161)        | 0.407        |
|             |       |       | Maximum likelihood      | 14        | 1.047 (0.914-1.201)        | 0.507        |
|             |       |       | MR Egger                | 14        | 1.061 (0.841-1.338)        | 0.626        |
|             |       |       | Weighted median         | 14        | 1.026 (0.827-1.273)        | 0.813        |
| <b>SCZ</b>  |       |       | MR-PRESSO <sup>†</sup>  |           | NA                         | NA           |
|             |       |       |                         |           |                            |              |
|             |       |       |                         |           |                            |              |
|             |       |       |                         |           |                            |              |
|             |       |       |                         |           |                            |              |
|             |       |       |                         |           |                            |              |
|             |       |       |                         |           |                            |              |
| PGC         | 0.348 | 0.450 | <b>Fixed-effect IVW</b> | <b>14</b> | <b>1.004 (0.948-1.064)</b> | <b>0.883</b> |
|             |       |       | Random effect IVW       | 14        | 1.004 (0.945-1.068)        | 0.889        |
|             |       |       | Maximum likelihood      | 14        | 1.005 (0.947-1.066)        | 0.881        |
|             |       |       | MR Egger                | 14        | 1.042 (0.932-1.164)        | 0.483        |
|             |       |       | Weighted median         | 14        | 1.008 (0.928-1.095)        | 0.845        |
|             |       |       | MR-PRESSO <sup>†</sup>  |           | NA                         | NA           |
|             |       |       |                         |           |                            |              |
| UK Biobank  | 0.485 | 0.919 | <b>Fixed-effect IVW</b> | <b>14</b> | <b>0.812 (0.585-1.125)</b> | <b>0.210</b> |
|             |       |       | Random effect IVW       | 14        | 0.812 (0.589-1.118)        | 0.202        |
|             |       |       | Maximum likelihood      | 14        | 0.814 (0.585-1.135)        | 0.225        |
|             |       |       | MR Egger                | 14        | 0.833 (0.464-1.493)        | 0.550        |
|             |       |       | Weighted median         | 14        | 0.788 (0.507-1.223)        | 0.288        |
|             |       |       | MR-PRESSO <sup>†</sup>  |           | NA                         | NA           |
|             |       |       |                         |           |                            |              |
| FinnGen     | 0.616 | 0.604 | <b>Fixed-effect IVW</b> | <b>14</b> | <b>1.121 (0.931-1.348)</b> | <b>0.227</b> |
|             |       |       | Random effect IVW       | 14        | 1.121 (0.946-1.328)        | 0.188        |
|             |       |       | Maximum likelihood      | 14        | 1.127 (0.926-1.372)        | 0.234        |
|             |       |       | MR Egger                | 14        | 1.044 (0.759-1.437)        | 0.796        |
|             |       |       | Weighted median         | 14        | 1.09 (0.842-1.41)          | 0.512        |
|             |       |       | MR-PRESSO <sup>†</sup>  |           | NA                         | NA           |
|             |       |       |                         |           |                            |              |
| <b>PTSD</b> |       |       |                         |           |                            |              |
|             |       |       |                         |           |                            |              |
|             |       |       |                         |           |                            |              |
|             |       |       |                         |           |                            |              |
|             |       |       |                         |           |                            |              |
|             |       |       |                         |           |                            |              |
|             |       |       |                         |           |                            |              |
| PGC         | 0.210 | 0.227 | <b>Fixed-effect IVW</b> | <b>14</b> | <b>0.972 (0.878-1.076)</b> | <b>0.588</b> |
|             |       |       | Random effect IVW       | 14        | 0.972 (0.866-1.091)        | 0.633        |
|             |       |       | Maximum likelihood      | 14        | 0.971 (0.875-1.076)        | 0.571        |
|             |       |       | MR Egger                | 14        | 0.871 (0.71-1.068)         | 0.208        |
|             |       |       | Weighted median         | 14        | 0.955 (0.825-1.105)        | 0.536        |
|             |       |       | MR-PRESSO <sup>†</sup>  |           | NA                         | NA           |
|             |       |       |                         |           |                            |              |
| UK Biobank  | 0.240 | 0.375 | <b>Fixed-effect IVW</b> | <b>14</b> | <b>0.814 (0.434-1.529)</b> | <b>0.523</b> |
|             |       |       | Random effect IVW       | 14        | 0.814 (0.403-1.644)        | 0.567        |
|             |       |       | Maximum likelihood      | 14        | 0.818 (0.434-1.541)        | 0.534        |
|             |       |       | MR Egger                | 14        | 0.505 (0.147-1.742)        | 0.301        |
|             |       |       | Weighted median         | 14        | 0.649 (0.275-1.529)        | 0.323        |
|             |       |       | MR-PRESSO <sup>†</sup>  |           | NA                         | NA           |
|             |       |       |                         |           |                            |              |
| FinnGen     | 0.089 | 0.997 | <b>Fixed-effect IVW</b> | <b>14</b> | <b>1.166 (0.927-1.469)</b> | <b>0.190</b> |
|             |       |       | Random effect IVW       | 14        | 1.166 (0.875-1.555)        | 0.294        |
|             |       |       | Maximum likelihood      | 14        | 1.173 (0.927-1.484)        | 0.183        |
|             |       |       | MR Egger                | 14        | 1.168 (0.696-1.958)        | 0.568        |
|             |       |       | Weighted median         | 14        | 1.189 (0.86-1.643)         | 0.295        |
|             |       |       | MR-PRESSO <sup>†</sup>  |           | NA                         | NA           |
|             |       |       |                         |           |                            |              |

| OCD               |       |       |                        |    |                     |       |
|-------------------|-------|-------|------------------------|----|---------------------|-------|
| IOCDF-GC & OCGAS  | 0.270 | 0.047 | Fixed-effect IVW       | 14 | 1.435 (1.121-1.837) | 0.004 |
|                   |       |       | Random effect IVW      | 14 | 1.435 (1.095-1.882) | 0.009 |
|                   |       |       | Maximum likelihood     | 14 | 1.492 (1.121-1.986) | 0.006 |
|                   |       |       | MR Egger               | 14 | 0.906 (0.563-1.459) | 0.692 |
|                   |       |       | Weighted median        | 14 | 1.153 (0.803-1.655) | 0.441 |
|                   |       |       | MR-PRESSO <sup>†</sup> |    | NA                  | NA    |
| UK Biobank        | 0.223 | 0.579 | Fixed-effect IVW       | 14 | 1.555 (0.835-2.897) | 0.164 |
|                   |       |       | Random effect IVW      | 14 | 1.555 (0.772-3.134) | 0.217 |
|                   |       |       | Maximum likelihood     | 14 | 1.566 (0.844-2.906) | 0.155 |
|                   |       |       | MR Egger               | 14 | 2.102 (0.596-7.411) | 0.271 |
|                   |       |       | Weighted median        | 14 | 1.78 (0.7-4.53)     | 0.226 |
|                   |       |       | MR-PRESSO <sup>†</sup> |    | NA                  | NA    |
| FinnGen           | 0.600 | 0.679 | Fixed-effect IVW       | 14 | 1.071 (0.836-1.372) | 0.588 |
|                   |       |       | Random effect IVW      | 14 | 1.071 (0.852-1.346) | 0.558 |
|                   |       |       | Maximum likelihood     | 14 | 1.075 (0.831-1.39)  | 0.582 |
|                   |       |       | MR Egger               | 14 | 0.993 (0.648-1.523) | 0.975 |
|                   |       |       | Weighted median        | 14 | 0.99 (0.699-1.403)  | 0.955 |
|                   |       |       | MR-PRESSO <sup>†</sup> |    | NA                  | NA    |
| Secondary outcome |       |       |                        |    |                     |       |
| Depression        |       |       |                        |    |                     |       |
| PGC & UK Biobank  | 0.041 | 0.084 | Fixed-effect IVW       | 14 | 1.003 (0.976-1.031) | 0.832 |
|                   |       |       | Random effect IVW      | 14 | 1.003 (0.967-1.04)  | 0.873 |
|                   |       |       | Maximum likelihood     | 14 | 1.003 (0.974-1.033) | 0.822 |
|                   |       |       | MR Egger               | 14 | 0.957 (0.902-1.015) | 0.171 |
|                   |       |       | Weighted median        | 14 | 1.003 (0.96-1.049)  | 0.882 |
|                   |       |       | MR-PRESSO <sup>†</sup> |    | NA                  | NA    |
| FinnGen           | 0.784 | 0.750 | Fixed-effect IVW       | 14 | 1.057 (1-1.117)     | 0.050 |
|                   |       |       | Random effect IVW      | 14 | 1.057 (1.01-1.106)  | 0.018 |
|                   |       |       | Maximum likelihood     | 14 | 1.059 (0.998-1.123) | 0.056 |
|                   |       |       | MR Egger               | 14 | 1.043 (0.948-1.148) | 0.402 |
|                   |       |       | Weighted median        | 14 | 1.043 (0.966-1.126) | 0.277 |
|                   |       |       | MR-PRESSO <sup>†</sup> |    | NA                  | NA    |

The best causal estimation highlighted in bold.

AD, anxiety disorders; MDD, major depressive disorder; BIP, bipolar disorder; SCZ, schizophrenia; PTSD, post-traumatic stress disorder; OCD, obsessive-compulsive disorder; PGC, Psychiatric Genomics Consortium; ANGST, Anxiety NeuroGenetics Study; IOCDF-GC, International Obsessive-Compulsive Disorder Foundation Genetics Collaborative; OCGAS, OCD Collaborative Genetics Association Study.  $P_h$ ,  $P$ -value for heterogeneity;  $P_p$ ,  $P$ -value for pleiotropy; NA, not applicable;

\*: The ORs are scaled per unit increase in log-transformed ascorbate.

†: No significant outliers.

Table S13. The MR analysis results of the causal effects of retinol metabolites on major mental disorders.

| Outcome          | $P_h$  | $P_p$ | MR method              | No. SNPs | OR (95% CI)         | $P$ -value |
|------------------|--------|-------|------------------------|----------|---------------------|------------|
| Primary outcome  |        |       |                        |          |                     |            |
| AD               |        |       |                        |          |                     |            |
| ANGST Consortium | <0.001 | 0.971 | Fixed-effect IVW       | 20       | 1.014 (0.937-1.097) | 0.730      |
|                  |        |       | Random effect IVW      | 20       | 1.014 (0.897-1.147) | 0.825      |
|                  |        |       | Maximum likelihood     | 20       | 1.016 (0.932-1.107) | 0.714      |
|                  |        |       | MR Egger               | 20       | 1.005 (0.621-1.628) | 0.984      |
|                  |        |       | Weighted median        | 20       | 1.018 (0.897-1.154) | 0.786      |
|                  |        |       | MR-PRESSO              | 19       | 0.989 (0.889-1.099) | 0.832      |
| UK Biobank       | 0.376  | 0.320 | Fixed-effect IVW       | 24       | 0.993 (0.959-1.028) | 0.699      |
|                  |        |       | Random effect IVW      | 24       | 0.993 (0.958-1.029) | 0.708      |
|                  |        |       | Maximum likelihood     | 24       | 0.993 (0.958-1.029) | 0.689      |
|                  |        |       | MR Egger               | 24       | 0.95 (0.865-1.043)  | 0.290      |
|                  |        |       | Weighted median        | 24       | 0.97 (0.923-1.019)  | 0.224      |
|                  |        |       | MR-PRESSO <sup>†</sup> |          | NA                  | NA         |
| FinnGen          | 0.058  | 0.617 | Fixed-effect IVW       | 25       | 0.972 (0.946-0.998) | 0.037      |
|                  |        |       | Random effect IVW      | 25       | 0.972 (0.941-1.004) | 0.087      |
|                  |        |       | Maximum likelihood     | 25       | 0.971 (0.944-0.999) | 0.044      |
|                  |        |       | MR Egger               | 25       | 0.992 (0.911-1.079) | 0.848      |
|                  |        |       | Weighted median        | 25       | 0.99 (0.951-1.031)  | 0.633      |
|                  |        |       | MR-PRESSO <sup>†</sup> |          | NA                  | NA         |
| MDD              |        |       |                        |          |                     |            |
| PGC              | 0.583  | 0.877 | Fixed-effect IVW       | 25       | 0.982 (0.963-1.001) | 0.067      |
|                  |        |       | Random effect IVW      | 25       | 0.982 (0.964-1)     | 0.056      |
|                  |        |       | Maximum likelihood     | 25       | 0.982 (0.962-1.002) | 0.074      |
|                  |        |       | MR Egger               | 25       | 0.986 (0.936-1.038) | 0.597      |
|                  |        |       | Weighted median        | 25       | 0.992 (0.964-1.021) | 0.570      |
|                  |        |       | MR-PRESSO <sup>†</sup> |          | NA                  | NA         |
| UK Biobank       | 0.015  | 0.573 | Fixed-effect IVW       | 24       | 0.901 (0.774-1.049) | 0.179      |
|                  |        |       | Random effect IVW      | 24       | 0.901 (0.737-1.101) | 0.309      |
|                  |        |       | Maximum likelihood     | 24       | 0.899 (0.764-1.058) | 0.200      |
|                  |        |       | MR Egger               | 24       | 1.041 (0.61-1.774)  | 0.885      |
|                  |        |       | Weighted median        | 24       | 0.904 (0.712-1.148) | 0.407      |
|                  |        |       | MR-PRESSO <sup>†</sup> |          | NA                  | NA         |
| BIP              |        |       |                        |          |                     |            |
| PGC              | 0.417  | 0.351 | Fixed-effect IVW       | 24       | 0.992 (0.97-1.015)  | 0.484      |
|                  |        |       | Random effect IVW      | 24       | 0.992 (0.969-1.015) | 0.491      |
|                  |        |       | Maximum likelihood     | 24       | 0.992 (0.969-1.015) | 0.478      |
|                  |        |       | MR Egger               | 24       | 1.02 (0.959-1.085)  | 0.536      |
|                  |        |       | Weighted median        | 24       | 1.003 (0.971-1.036) | 0.846      |
|                  |        |       | MR-PRESSO <sup>†</sup> |          | NA                  | NA         |
| UK Biobank       | 0.736  | 0.130 | Fixed-effect IVW       | 24       | 1.046 (0.951-1.15)  | 0.354      |
|                  |        |       | Random effect IVW      | 24       | 1.046 (0.961-1.138) | 0.300      |
|                  |        |       | Maximum likelihood     | 24       | 1.048 (0.951-1.155) | 0.345      |
|                  |        |       | MR Egger               | 24       | 1.257 (0.981-1.61)  | 0.084      |

|                        |       |                     |                          |           |                            |                         |
|------------------------|-------|---------------------|--------------------------|-----------|----------------------------|-------------------------|
| FinnGen                | 0.743 | 0.209               | Weighted median          | 24        | 1.007 (0.884-1.148)        | 0.912                   |
|                        |       |                     | MR-PRESSO <sup>†</sup>   |           | NA                         | NA                      |
|                        |       |                     | <b>Fixed-effect IVW</b>  | <b>25</b> | <b>0.943 (0.898-0.991)</b> | <b>0.020</b>            |
|                        |       |                     | Random effect IVW        | 25        | 0.943 (0.903-0.986)        | 0.009                   |
|                        |       |                     | Maximum likelihood       | 25        | 0.942 (0.896-0.991)        | 0.021                   |
|                        |       |                     | MR Egger                 | 25        | 1.018 (0.898-1.154)        | 0.787                   |
|                        |       |                     | Weighted median          | 25        | 0.938 (0.873-1.008)        | 0.081                   |
|                        |       |                     | MR-PRESSO <sup>†</sup>   |           | NA                         | NA                      |
| <b>SCZ</b>             |       |                     |                          |           |                            |                         |
| PGC                    | 0.003 | 0.799               | Fixed-effect IVW         | 24        | 0.994 (0.973-1.015)        | 0.561                   |
|                        |       |                     | <b>Random effect IVW</b> | <b>24</b> | <b>0.994 (0.965-1.024)</b> | <b>0.682</b>            |
|                        |       |                     | Maximum likelihood       | 24        | 0.993 (0.972-1.016)        | 0.561                   |
|                        |       |                     | MR Egger                 | 24        | 1.004 (0.925-1.089)        | 0.928                   |
|                        |       |                     | Weighted median          | 24        | 1.014 (0.982-1.047)        | 0.400                   |
|                        |       |                     | MR-PRESSO                | 22        | 1.007 (0.985-1.029)        | 0.546                   |
|                        |       |                     | UK Biobank               | 0.309     | 0.408                      | <b>Fixed-effect IVW</b> |
| Random effect IVW      | 24    | 0.975 (0.853-1.113) |                          |           |                            | 0.706                   |
| Maximum likelihood     | 24    | 0.973 (0.854-1.109) |                          |           |                            | 0.682                   |
| MR Egger               | 24    | 1.12 (0.79-1.589)   |                          |           |                            | 0.532                   |
| Weighted median        | 24    | 1.086 (0.902-1.308) |                          |           |                            | 0.385                   |
| MR-PRESSO <sup>†</sup> |       | NA                  |                          |           |                            | NA                      |
| FinnGen                | 0.785 | 0.758               |                          |           |                            | <b>Fixed-effect IVW</b> |
|                        |       |                     | Random effect IVW        | 25        | 0.978 (0.923-1.038)        | 0.469                   |
|                        |       |                     | Maximum likelihood       | 25        | 0.978 (0.913-1.048)        | 0.530                   |
|                        |       |                     | MR Egger                 | 25        | 0.954 (0.804-1.132)        | 0.597                   |
|                        |       |                     | Weighted median          | 25        | 1.009 (0.915-1.114)        | 0.854                   |
|                        |       |                     | MR-PRESSO <sup>†</sup>   |           | NA                         | NA                      |
|                        |       |                     | <b>PTSD</b>              |           |                            |                         |
| PGC                    | 0.400 | 1 0.6271677         | <b>Fixed-effect IVW</b>  | <b>23</b> | <b>0.994 (0.958-1.032)</b> | <b>0.760</b>            |
|                        |       |                     | Random effect IVW        | 23        | 0.994 (0.957-1.033)        | 0.765                   |
|                        |       |                     | Maximum likelihood       | 23        | 0.994 (0.956-1.033)        | 0.754                   |
|                        |       |                     | MR Egger                 | 23        | 0.969 (0.868-1.081)        | 0.578                   |
|                        |       |                     | Weighted median          | 23        | 1.01 (0.957-1.067)         | 0.712                   |
|                        |       |                     | MR-PRESSO <sup>†</sup>   |           | NA                         | NA                      |
|                        |       |                     | UK Biobank               | 0.661     | 0.751                      | <b>Fixed-effect IVW</b> |
| Random effect IVW      | 24    | 0.906 (0.724-1.134) |                          |           |                            | 0.388                   |
| Maximum likelihood     | 24    | 0.904 (0.704-1.16)  |                          |           |                            | 0.428                   |
| MR Egger               | 24    | 0.997 (0.529-1.879) |                          |           |                            | 0.993                   |
| Weighted median        | 24    | 0.88 (0.633-1.224)  |                          |           |                            | 0.449                   |
| MR-PRESSO <sup>†</sup> |       | NA                  |                          |           |                            | NA                      |
| FinnGen                | 0.417 | 0.783               |                          |           |                            | <b>Fixed-effect IVW</b> |
|                        |       |                     | Random effect IVW        | 25        | 0.962 (0.883-1.048)        | 0.378                   |
|                        |       |                     | Maximum likelihood       | 25        | 0.961 (0.881-1.048)        | 0.369                   |
|                        |       |                     | MR Egger                 | 25        | 0.935 (0.748-1.167)        | 0.557                   |
|                        |       |                     | Weighted median          | 25        | 0.997 (0.882-1.128)        | 0.962                   |
|                        |       |                     | MR-PRESSO <sup>†</sup>   |           | NA                         | NA                      |

| OCD               |       |       |                        |    |                     |       |
|-------------------|-------|-------|------------------------|----|---------------------|-------|
| IOCDF-GC & OCGAS  | 0.456 | 0.721 | Fixed-effect IVW       | 24 | 0.984 (0.905-1.07)  | 0.706 |
|                   |       |       | Random effect IVW      | 24 | 0.984 (0.905-1.07)  | 0.706 |
|                   |       |       | Maximum likelihood     | 24 | 0.983 (0.901-1.072) | 0.691 |
|                   |       |       | MR Egger               | 24 | 0.945 (0.745-1.198) | 0.643 |
|                   |       |       | Weighted median        | 24 | 0.98 (0.868-1.106)  | 0.742 |
|                   |       |       | MR-PRESSO <sup>†</sup> |    | NA                  | NA    |
| UK Biobank        | 0.373 | 0.377 | Fixed-effect IVW       | 24 | 0.955 (0.752-1.213) | 0.707 |
|                   |       |       | Random effect IVW      | 24 | 0.955 (0.746-1.223) | 0.716 |
|                   |       |       | Maximum likelihood     | 24 | 0.954 (0.745-1.222) | 0.710 |
|                   |       |       | MR Egger               | 24 | 1.259 (0.658-2.409) | 0.494 |
|                   |       |       | Weighted median        | 24 | 0.974 (0.687-1.383) | 0.884 |
|                   |       |       | MR-PRESSO <sup>†</sup> |    | NA                  | NA    |
| FinnGen           | 0.334 | 0.267 | Fixed-effect IVW       | 25 | 0.919 (0.84-1.006)  | 0.068 |
|                   |       |       | Random effect IVW      | 25 | 0.919 (0.836-1.011) | 0.081 |
|                   |       |       | Maximum likelihood     | 25 | 0.916 (0.834-1.007) | 0.069 |
|                   |       |       | MR Egger               | 25 | 1.045 (0.822-1.327) | 0.724 |
|                   |       |       | Weighted median        | 25 | 0.936 (0.824-1.063) | 0.311 |
|                   |       |       | MR-PRESSO <sup>†</sup> |    | NA                  | NA    |
| Secondary outcome |       |       |                        |    |                     |       |
| Depression        |       |       |                        |    |                     |       |
| PGC & UK Biobank  | 0.071 | 0.599 | Fixed-effect IVW       | 24 | 0.994 (0.984-1.005) | 0.285 |
|                   |       |       | Random effect IVW      | 24 | 0.994 (0.982-1.007) | 0.376 |
|                   |       |       | Maximum likelihood     | 24 | 0.994 (0.984-1.005) | 0.292 |
|                   |       |       | MR Egger               | 24 | 1.003 (0.97-1.036)  | 0.872 |
|                   |       |       | Weighted median        | 24 | 0.995 (0.98-1.01)   | 0.484 |
|                   |       |       | MR-PRESSO <sup>†</sup> |    | NA                  | NA    |
| FinnGen           | 0.051 | 0.309 | Fixed-effect IVW       | 25 | 0.971 (0.951-0.991) | 0.004 |
|                   |       |       | Random effect IVW      | 25 | 0.971 (0.947-0.995) | 0.019 |
|                   |       |       | Maximum likelihood     | 25 | 0.97 (0.949-0.991)  | 0.005 |
|                   |       |       | MR Egger               | 25 | 1.001 (0.94-1.067)  | 0.971 |
|                   |       |       | Weighted median        | 25 | 0.984 (0.953-1.017) | 0.347 |
|                   |       |       | MR-PRESSO <sup>†</sup> |    | NA                  | NA    |

The best causal estimation highlighted in bold.

AD, anxiety disorders; MDD, major depressive disorder; BIP, bipolar disorder; SCZ, schizophrenia; PTSD, post-traumatic stress disorder; OCD, obsessive-compulsive disorder; PGC, Psychiatric Genomics Consortium; ANGST, Anxiety NeuroGenetics Study; IOCDF-GC, International Obsessive-Compulsive Disorder Foundation Genetics Collaborative; OCGAS, OCD Collaborative Genetics Association Study.  $P_h$ ,  $P$ -value for heterogeneity;  $P_p$ ,  $P$ -value for pleiotropy; NA, not applicable;

\*: The ORs are scaled per unit increase in log-transformed retinol.

†: No significant outliers.

## References:

1. Major, J.M.; Yu, K.; Wheeler, W.; Zhang, H.; Cornelis, M.C.; Wright, M.E.; Yeager, M.; Snyder, K.; Weinstein, S.J.; Mondul, A.; et al. Genome-wide association study identifies common variants associated with circulating vitamin E levels. *Hum Mol Genet* **2011**, *20*, 3876-3883.
2. Zheng, J.S.; Luan, J.; Sofianopoulou, E.; Imamura, F.; Stewart, I.D.; Day, F.R.; Pietzner, M.; Wheeler, E.; Lotta, L.A.; Gundersen, T.E.; et al. Plasma Vitamin C and Type 2 Diabetes: Genome-Wide Association Study and Mendelian Randomization Analysis in European Populations. *Diabetes Care* **2021**, *44*, 98-106.
3. Mondul, A.M.; Yu, K.; Wheeler, W.; Zhang, H.; Weinstein, S.J.; Major, J.M.; Cornelis, M.C.; Männistö, S.; Hazra, A.; Hsing, A.W.; et al. Genome-wide association study of circulating retinol levels. *Hum Mol Genet* **2011**, *20*, 4724-4731.
4. Hendrickson, S.J.; Hazra, A.; Chen, C.; Eliassen, A.H.; Kraft, P.; Rosner, B.A.; Willett, W.C.  $\beta$ -Carotene 15,15'-monooxygenase 1 single nucleotide polymorphisms in relation to plasma carotenoid and retinol concentrations in women of European descent. *Am J Clin Nutr* **2012**, *96*, 1379-1389.
5. D'Adamo, C.R.; D'Urso, A.; Ryan, K.A.; Yerges-Armstrong, L.M.; Semba, R.D.; Steinle, N.I.; Mitchell, B.D.; Shuldiner, A.R.; McArdle, P.F. A Common Variant in the SETD7 Gene Predicts Serum Lycopene Concentrations. *Nutrients* **2016**, *8*, 82.
6. Otowa, T.; Hek, K.; Lee, M.; Byrne, E.M.; Mirza, S.S.; Nivard, M.G.; Bigdeli, T.; Aggen, S.H.; Adkins, D.; Wolen, A.; et al. Meta-analysis of genome-wide association studies of anxiety disorders. *Mol Psychiatry* **2016**, *21*, 1391-1399.
7. Kurki, M.I.; Karjalainen, J.; Palta, P.; Sipilä, T.P.; Kristiansson, K.; Donner, K.; Reeve, M.P.; Laivuori, H.; Aavikko, M.; Kaunisto, M.A.; et al. FinnGen: Unique genetic insights from combining isolated population and national health register data. *medRxiv* **2022**, 2022.03.03.22271360.
8. Wray, N.R.; Ripke, S.; Mattheisen, M.; Trzaskowski, M.; Byrne, E.M.; Abdellaoui, A.; Adams, M.J.; Agerbo, E.; Air, T.M.; Andlauer, T.M.F.; et al. Genome-wide association analyses identify 44 risk variants and refine the genetic architecture of major depression. *Nat Genet* **2018**, *50*, 668-681.
9. Mullins, N.; Forstner, A.J.; O'Connell, K.S.; Coombes, B.; Coleman, J.R.I.; Qiao, Z.; Als, T.D.; Bigdeli, T.B.; Børte, S.; Bryois, J.; et al. Genome-wide association study of more than 40,000 bipolar disorder cases provides new insights into the underlying biology. *Nat Genet* **2021**, *53*, 817-829.
10. Trubetskoy, V.; Pardiñas, A.F.; Qi, T.; Panagiotaropoulou, G.; Awasthi, S.; Bigdeli, T.B.; Bryois, J.; Chen, C.Y.; Dennison, C.A.; Hall, L.S.; et al. Mapping genomic loci implicates genes and synaptic biology in schizophrenia. *Nature* **2022**, *604*, 502-508.
11. Nievergelt, C.M.; Maihofer, A.X.; Klengel, T.; Atkinson, E.G.; Chen, C.Y.; Choi, K.W.; Coleman, J.R.I.; Dalvie, S.; Duncan, L.E.; Gelernter, J.; et al. International meta-analysis of PTSD genome-wide association studies identifies sex- and ancestry-specific genetic risk loci. *Nat Commun* **2019**, *10*, 4558.
12. International Obsessive Compulsive Disorder Foundation Genetics Collaborative (IOCDF-GC) and OCD Collaborative Genetics Association Studies (OC GAS). Revealing the complex genetic architecture of obsessive-compulsive disorder using meta-analysis. *Mol Psychiatry* **2018**, *23*, 1181-1188.
13. Howard, D.M.; Adams, M.J.; Clarke, T.K.; Hafferty, J.D.; Gibson, J.; Shirali, M.; Coleman, J.R.I.; Hagenaars, S.P.; Ward, J.; Wigmore, E.M.; et al. Genome-wide meta-analysis of depression identifies 102 independent variants and highlights the importance of the prefrontal brain regions. *Nat Neurosci* **2019**, *22*, 343-352.
